# Supplementary material for: Hydrogen-Bonding Interactions Trigger a Spin-Flip in Iron(III) Porphyrin Complexes
Source: PubMed Central journal article supplement (PMC4687417; doi:10.1002/anie.201411399), 2015-01-30
Supplement: anie0054-4796-sd1.pdf [file anie0054-4796-sd1.pdf]

Supporting Information

**Hydrogen-Bonding Interactions Trigger a Spin-Flip in Iron(III) Porphyrin Complexes\*\***

*Dipankar Sahoo, Matthew G. Quesne, Sam P. de Visser,\* and Sankar Prasad Rath\**

anie\_201411399\_sm\_miscellaneous\_information.pdf

## **Supporting Information**

### **Instrumentation.**

UV-vis spectra were recorded on a PerkinElmer UV/vis spectrometer. Electron paramagnetic resonance (EPR) spectra were obtained on a Bruker EMX EPR spectrometer. Elemental (C, H, and N) analyses were performed on a Perkin-Elmer 2400II elemental analyzer.  $^1\text{H}$  NMR spectra were recorded on a JEOL 500 MHz instrument. The spectra for paramagnetic molecules were recorded over a 100- kHz bandwidth with 64 K data points and a 5-ms  $90^\circ$  pulse. For a typical spectrum between 2000 and 3000 transients were accumulated with a 50- $\mu\text{s}$  delay time. The residual  $^1\text{H}$  resonances of the solvents were used as a secondary reference.  $^{57}\text{Fe}$  Mössbauer spectra were recorded using a Wissel 1200 spectrometer and a proportional counter.  $^{57}\text{Co}(\text{Rh})$  in a constant acceleration mode was used as the radioactive source. Isomer shifts ( $\delta$ ) are given related to  $\alpha$ -iron foil at room temperature. Magnetic susceptibility data were collected using a Quantum Design MPMS SQUID magnetometer over the temperature range 5 to 300K.

### **X-ray Structure Solution and Refinement.**

Single-crystal X-ray data were collected at 100 K on a Bruker SMART APEX CCD diffractometer equipped with CRYO Industries low temperature apparatus and intensity data were collected using graphite-monochromated Mo  $K\alpha$  radiation ( $\lambda = 0.71073 \text{ \AA}$ ). The data integration and reduction were processed with SAINT software.<sup>[1]</sup> An absorption correction was applied.<sup>[2]</sup> The structure was solved by the direct method using SHELXS-97 and was refined on F<sup>2</sup> by full-matrix least-squares technique using the SHELXL-2014 program package.<sup>[3]</sup> Non-hydrogen atoms were refined anisotropically. In the refinement, hydrogens were treated as riding atoms using SHELXL default parameters. Crystal data and data collection parameters are given in Table S1. X-ray structure of **1** contains severely disordered solvent molecules (twelve cyclohexane and eight water molecules in the unit cell) which could not be modeled properly due to weakly diffracting nature of the crystal. SQUEEZE<sup>[4]</sup> routine of PLATON was therefore used to remove such unbound and highly disordered solvent molecules but the reported formula includes the solvents.

### **Computational Details.**

Calculations were initiated from the crystal structure coordinates reported in this paper. Complex **1** represents  $[\text{Fe}^{\text{III}}(\text{TDMOETPP})\text{Cl}]$ , TDMOETPP=3,5-Dimethyl-2,3,7,8,12,13,17,18-octaethyl-5,10,15,20-tetraphenylporphyrin. Hydrogen atoms were added to this complex to give the molecular formula  $\text{C}_{68}\text{H}_{76}\text{N}_4\text{FeCl}$  and a total atom count of 150. The second structure **2** uses  $[\text{Fe}^{\text{III}}(\text{TDMOETPP})\text{Cl}]$  in complex with two molecules of phenol, acting as the H-bond donors in the system. After adding the hydrogen atoms to crystal

structure **2**, we were therefore left with a system that has the molecular formula  $C_{80}H_{88}N_4O_2FeCl$  and an atom count of 176. The crystal structure **4** has two aniline molecules in place of the phenol groups of structure **2** and therefore has the molecular formula  $C_{86}H_{102}N_6FeCl$  with a total atom count of 178. All structures were optimized using the Jaguar 7.9 software package.<sup>[5]</sup> No constraints were placed on complex **1** with the H donor bonding distances being maintained for complexes **2** and **4**. Analytical frequencies were also carried out on all optimised structures using the Gaussian-09 software package.<sup>[6]</sup> Free energies were taken from the Gaussian frequencies and contain, zero-point, thermal and entropic corrections to the energy at 298.15 K and 1 atm.

Initial geometry optimisations were carried out on the doublet, quartet and sextet spin states for each structure using both the unrestricted hybrid density functional method B3LYP,<sup>[7]</sup> as well as the pure density functional method BP86.<sup>[8]</sup> A basis set containing the 6-31G+ double- $\zeta$  basis set on all atoms except for the iron were a double- $\zeta$  LACVP basis set, that includes an effective core potential, was used (basis set BS1).<sup>[9]</sup> Using the optimised structures for each spin state in complex **2** a geometry scan was run to increase the Cl---HOPh bond lengths from close to 2 Å to close to 3 Å, by moving the phenol molecules away in steps of 0.1 Å. All scan energies and geometries for the structure **2** complex were obtained using BS1 and energies were corrected using data from the vibrational frequencies. Additional gas phase, solvent corrected and dispersion corrected calculations were done with the triple- $\zeta$  LACV3P+ basis set on iron (with core potential) and 6-311+G\* on the rest of the atoms (basis set BS2).

All three systems were also optimised using a slightly improved initial basis set (BS3) containing the polarised double- $\zeta$  basis 6-31G+\* on all atoms except for the iron were the double- $\zeta$  basis with an effective core potential LACVP\* was used. After crystal structure coordinate were optimized in BS3, using the same protocol as for BS1, a four basis set (BS4) were the triple- $\zeta$  LACV3P+\*\*\* basis set on iron (with core potential) and 6-311++G\*\* on the rest of the atoms was used. Single point gas phase, solvent corrected and dispersion corrected calculation were run applying the BS4 energies to BS3 optimisations.

The hydrogen bond strengths of the phenol and aniline bound complexes were determined from the reaction energies for equations 1 and 2 at UB3LYP/BS3 and include zero-point energies.

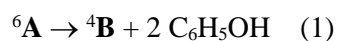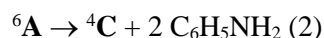

## Experimental Section:

### Materials:

Porphyrin free base 3,5-dimethyl-2,3,7,8,12,13,17,18-octaethyl-5,10,15,20-tetraphenylporphyrin was prepared from 3,5-dimethyl benzaldehyde and the diethyl pyrrole using a literature procedure.<sup>[10]</sup> Reagents and solvents were purchased from commercial sources and purified by standard procedures before use.

### Synthesis of 1:

3,5-Dimethyl-2,3,7,8,12,13,17,18-octaethyl-5,10,15,20-tetraphenylporphyrin (100 mg, 0.105 mmol) was dissolved in 100 mL N, N-dimethylformamide. Excess FeCl<sub>2</sub> (66 mg, 0.51 mmol) was added and reflux for 2.5 hours under nitrogen. The resulting solution was then cooled to room temperature and transferred into a separatory funnel. 100 mL chloroform was added to the solution which was then washed well with 0.2(N) HCl (2×100 mL). Organic layer was separated and dried over anhydrous Na<sub>2</sub>SO<sub>4</sub>. The resulting solution was evaporated to dryness and purified by column chromatography using silica gel. The major fraction eluted with chloroform was collected and vacuum dried to obtain brown solid. Yield: 70 mg (64%). Anal. Calcd (found) for C<sub>74</sub>H<sub>90</sub>N<sub>4</sub>OFeCl: C, 77.77 (78.00); H, 7.94 (8.22); N, 4.90 (5.11). UV-vis (benzene) [ $\lambda_{\max}$ , nm ( $\epsilon$ , M<sup>-1</sup> cm<sup>-1</sup>): 443(2.4×10<sup>4</sup>), 401(2.2 ×10<sup>4</sup>), 578(2.0×10<sup>1</sup>); <sup>1</sup>H NMR (CDCl<sub>3</sub>, 295K): *o*-H, 10.72, 9.48; *p*-H, 8.21; H-CH<sub>3</sub>(*m*), 3.81, 3.41; -CH<sub>2</sub>-, 45.43, 37.65, 34.47 and 23.52 ppm. EPR data: in solid (77 K),  $g_{\perp}$  = 5.78 and  $g_{\parallel}$  = 1.99; in toluene (77 K),  $g_{\perp}$  = 5.75 and  $g_{\parallel}$  = 1.99.

### Synthesis of 2:

Compound **1** (100 mg, 0.096 mmol) was dissolved in chloroform (10 mL); phenol (45 mg, 0.48 mmol) was added and the mixture was stirred for 15 min under nitrogen atmosphere. The resulting solution was then carefully layered with n-hexane and kept for slow diffusion. On standing for 6–8 days in air at room temperature, dark-purple crystals were formed, which was collected by filtration, washed thoroughly with the mother liquor, and dried under vacuum. Yield: 71 mg (60%). Anal. Calcd (found) for C<sub>94</sub>H<sub>102</sub>N<sub>4</sub>O<sub>4</sub>FeCl<sub>7</sub>: C, 68.18 (68.40); H, 6.21 (6.43); N, 3.38 (3.57). UV-vis (benzene) [ $\lambda_{\max}$ , nm ( $\epsilon$ , M<sup>-1</sup> cm<sup>-1</sup>): 440 (3.2×10<sup>4</sup>), 581 (2.2 ×10<sup>1</sup>). <sup>1</sup>H NMR (CDCl<sub>3</sub>, 295 K): *o*-H, 10.83, 10.29; *p*-H, 7.51; -CH<sub>2</sub>-, 49.29, 24.93, 24.13 and 13.13 ppm. EPR data: in solid (77 K),  $g_{\perp}$  = 4.16 and  $g_{\parallel}$  = 2.01; in toluene (77 K),  $g_{\perp}$  = 4.18 and  $g_{\parallel}$  = 2.00.

### Synthesis of 3:

Compound **1** (100 mg, 0.096 mmol) was dissolved in chloroform (10 mL); 2-isopropyl aniline (64 mg, 0.48 mmol) was added and the mixture was stirred for 15 min under nitrogen atmosphere. The resulting solution was then carefully layered with n-hexane and kept for slow diffusion in air at room temperature. On standing for 6–8 days, dark-purple crystals were formed, which was collected by filtration, washed thoroughly with the mother liquor, and dried under vacuum. Yield: 70 mg (55%). Anal. Calcd (found) for C<sub>92</sub>H<sub>109</sub>N<sub>7</sub>FeCl: C, 78.69 (78.44); H, 7.82 (8.05); N, 6.98 (6.74). UV-vis (benzene) [ $\lambda_{\max}$ , nm ( $\epsilon$ , M<sup>-1</sup> cm<sup>-1</sup>): 437(2.1×10<sup>4</sup>). <sup>1</sup>H NMR (CDCl<sub>3</sub>, 295 K): *o*-H, 11.01, 10.23; *p*-

H, 8.99; -CH<sub>2</sub>-, 50.07, 25.07, 24.09 and 13.41 ppm. EPR data: in toluene (77 K), g<sub>⊥</sub> = 4.19 and g<sub>∥</sub> = 1.96.

#### References:

- [1] SAINT+, 6.02 ed., Bruker AXS, Madison, WI, **1999**.
- [2] G.M. Sheldrick, SADABS 2.0, **2000**.
- [3] G. M. Sheldrick, *SHELXL-2014: Program for Crystal Structure Refinement*; University of Göttingen: Göttingen, Germany, **2014**.
- [4] A. L. Spek, *J. Appl. Crystallogr.* **2003**, 36, 7.
- [5] *Jaguar*, version 7.9, Schrodinger, LLC, New York, NY, 2011.
- [6] M. J. Frisch et al Gaussian 09, revision C.01; Gaussian, Inc., Wallingford, CT, 2010.
- [7] (a) A. D. Becke, *J. Chem. Phys.* **1993**, 98, 5648–5652. (b) C. Lee, W. Yang, R. G. Parr, *Phys. Rev. B* **1988**, 37, 785–789.
- [8] A. D. Becke, *Phys. Rev. A* **1988**, 38, 3098–3100. (b) J. P. Perdew, *Phys. Rev. B* **1986**, 33, 8822–8824.
- [9] P. J. Hay, W. R. Wadt, W. R. *J. Chem. Phys.* **1985**, 82, 270–283.
- [10] K. M. Barkigia, M. Dolores Berber, J. Fajer, C. J. Medforth, M. W. Renner, K. M. Smith, *J. Am. Chem. Soc.* **1990**, 112, 8851-8857.

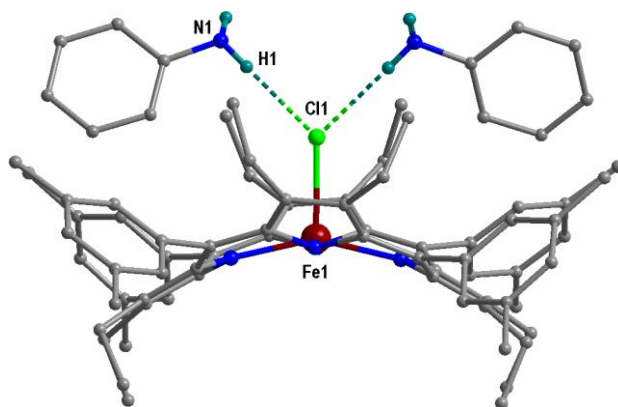

**Figure S1.** Molecular structures (at 100 K) of **4** (all the H atoms except for the aniline have been omitted for clarity). Selected bond distances (Å) and angle (deg) for **4**: Fe1–N1, 1.997(5); Fe1–N2, 1.976(4); Fe1–Cl1, 2.312(3); N1–Fe1–N2, 88.74(19); N1–Fe1–Cl1, 103.18(14); N2–Fe1–Cl1, 95.77(15). H-bonding interactions: N1L···Cl1, 3.318(7); N2L···N1L, 3.147(9).

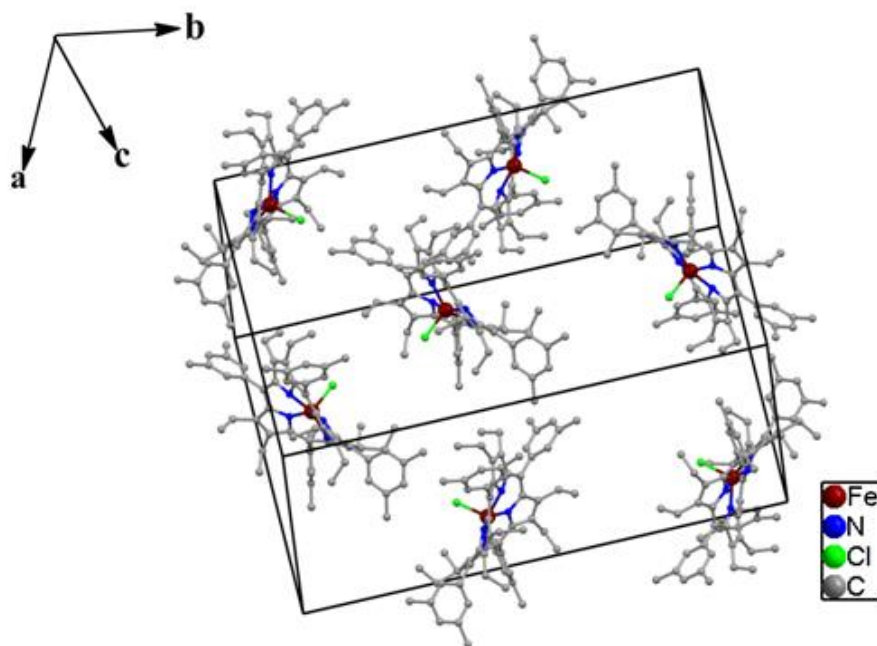

**Figure S2.** Diagram illustrating the packing of complex **1** in the unit cell (H atoms have been omitted for clarity).

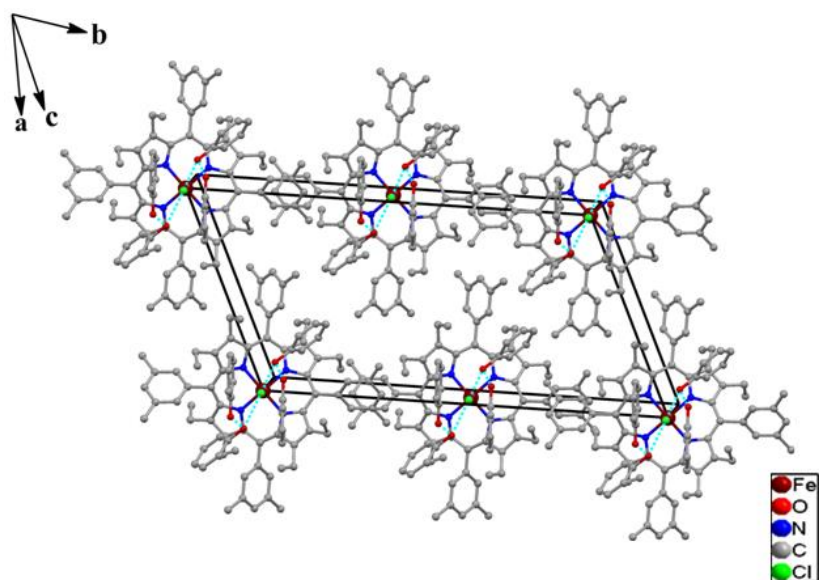

**Figure S3.** Diagram illustrating the packing of complex **2** in the unit cell (H atoms and  $\text{CHCl}_3$  have been omitted for clarity).

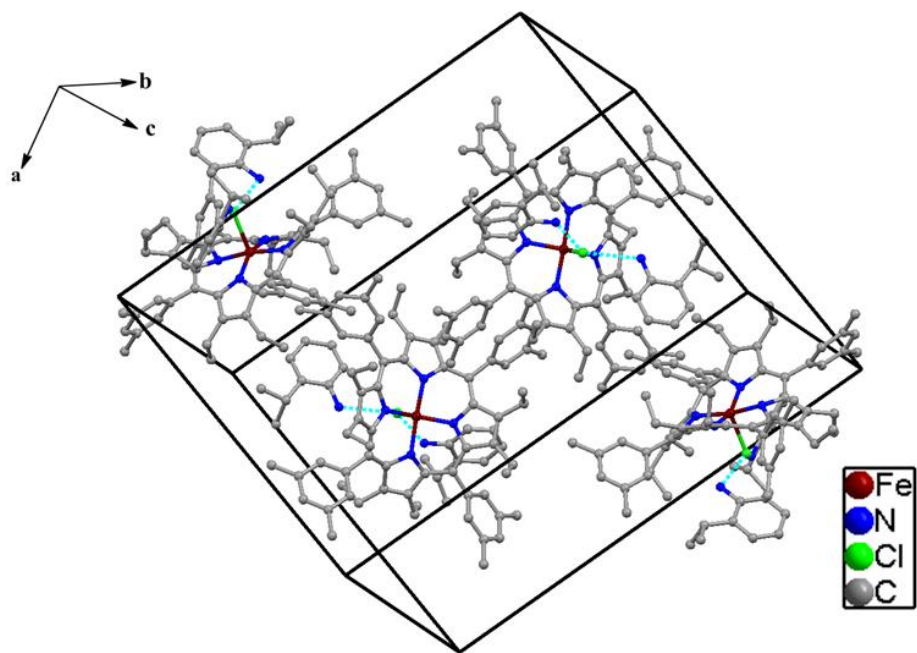

**Figure S4.** Diagram illustrating the packing of complex **3** in the unit cell (H atoms have been omitted for clarity)

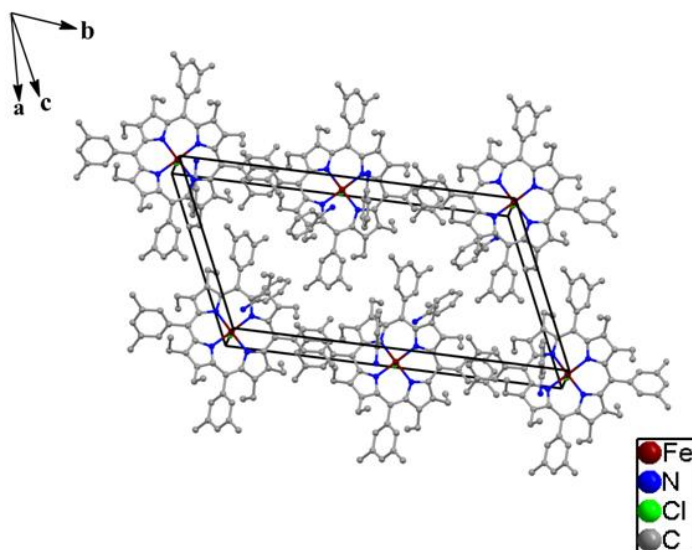

**Figure S5.** Diagram illustrating the packing of complex **4** in the unit cell ( $\text{CH}_2\text{Cl}_2$  and H atoms have been omitted for clarity)



**Table S1.** Crystal data and data collection parameters.

|                                                     | <b>1</b>                                               | <b>2</b>                                                                          | <b>3</b>                                              | <b>4</b>                                                           |
|-----------------------------------------------------|--------------------------------------------------------|-----------------------------------------------------------------------------------|-------------------------------------------------------|--------------------------------------------------------------------|
| Formula                                             | C <sub>77</sub> H <sub>96</sub> Cl N <sub>4</sub> Fe O | C <sub>94</sub> H <sub>102</sub> Cl <sub>7</sub> N <sub>4</sub> O <sub>4</sub> Fe | C <sub>92</sub> H <sub>109</sub> Cl Fe N <sub>7</sub> | C <sub>94</sub> H <sub>108</sub> Cl <sub>5</sub> Fe N <sub>8</sub> |
| <i>T</i> , (K)                                      | 100(2)                                                 | 100(2)                                                                            | 100(2)                                                | 100(2)                                                             |
| Formula weight                                      | 1184.87                                                | 1655.79                                                                           | 1404.16                                               | 1582.98                                                            |
| Crystal system                                      | Orthorombic                                            | Monoclinic                                                                        | Monoclinic                                            | Monoclinic                                                         |
| Space group                                         | <i>Pbca</i>                                            | <i>C 2</i>                                                                        | <i>P 21/c</i>                                         | <i>C 2</i>                                                         |
| <i>a</i> , Å                                        | 19.510(5)                                              | 26.129(5)                                                                         | 16.617(7)                                             | 26.066(5)                                                          |
| <i>b</i> , Å                                        | 24.761(5)                                              | 12.607(5)                                                                         | 19.957(9)                                             | 12.554(5)                                                          |
| <i>c</i> , Å                                        | 31.415(5)                                              | 13.960(5)                                                                         | 25.419(11)                                            | 13.936(5)                                                          |
| <i>α</i> , deg                                      | 90.000(5)                                              | 90.000(5)                                                                         | 90                                                    | 90.000(5)                                                          |
| <i>β</i> , deg                                      | 90.000(5)                                              | 114.586(5)                                                                        | 108.342(9)                                            | 114.244(5)                                                         |
| <i>γ</i> , deg                                      | 90.000(5)                                              | 90.000(5)                                                                         | 90                                                    | 90.000(5)                                                          |
| <i>V</i> , Å <sup>3</sup>                           | 15176(6)                                               | 4182(2)                                                                           | 8001(6)                                               | 4158(2)                                                            |
| Radiation (λ, Å)                                    | Mo Kα (0.71073)                                        | Mo Kα (0.71073)                                                                   | Mo Kα (0.71073)                                       | Mo Kα (0.71073)                                                    |
| <i>Z</i>                                            | 8                                                      | 2                                                                                 | 4                                                     | 2                                                                  |
| <i>d</i> <sub>calcd</sub> , g.cm <sup>-3</sup>      | 1.037                                                  | 1.315                                                                             | 1.166                                                 | 1.264                                                              |
| <i>F</i> (000)                                      | 5096                                                   | 1742                                                                              | 3012                                                  | 1678                                                               |
| <i>μ</i> , mm <sup>-1</sup>                         | 0.275                                                  | 0.459                                                                             | 0.272                                                 | 0.394                                                              |
| No. of unique data                                  | 13322                                                  | 6310                                                                              | 15658                                                 | 7496                                                               |
| No. of parameters, refined                          | 684                                                    | 511                                                                               | 895                                                   | 507                                                                |
| GOF on <i>F</i> <sup>2</sup>                        | 0.899                                                  | 1.048                                                                             | 0.982                                                 | 1.036                                                              |
| <i>R</i> <sup>1a</sup> [ <i>I</i> > 2σ( <i>I</i> )] | 0.0734                                                 | 0.0802                                                                            | 0.1114                                                | 0.0610                                                             |
| <i>R</i> <sup>1a</sup> (all data)                   | 0.1259                                                 | 0.0914                                                                            | 0.3061                                                | 0.0702                                                             |
| <i>wR</i> <sup>2b</sup> (all data)                  | 0.2077                                                 | 0.2332                                                                            | 0.3746                                                | 0.1732                                                             |

$${}^a R1 = \frac{\sum ||F_o| - |F_c||}{\sum |F_o|}; \quad {}^b wR2 = \sqrt{\frac{\sum [w(F_o^2 - F_c^2)^2]}{\sum [w(F_o^2)]}}$$

**Table S2.** Selected Bond Distance (Å) and Angles (°) for **1**, **2**, **3** and **4**.

|                  | <b>1</b>   | <b>2</b> | <b>3</b> | <b>4</b>   |
|------------------|------------|----------|----------|------------|
| Fe(1)-N(1)       | 2.040(3)   | 1.997(6) | 1.965(7) | 1.997(5)   |
| Fe(1)-N(2)       | 2.044(3)   | 1.960(5) | 1.970(7) | 1.976(4)   |
| Fe(1)-N(3)       | 2.031(3)   |          | 1.937(7) |            |
| Fe(1)-N(4)       | 2.046(3)   |          | 1.968(7) |            |
| Fe(1)-Cl(1)      | 2.2287(12) | 2.384(4) | 2.357(3) | 2.312(3)   |
| N(1)-Fe(1)-N(2)  | 87.05(12)  | 89.5 (2) | 89.2(3)  | 88.74(19)  |
| N(1)-Fe(1)-N(4)  | 87.17(12)  |          | 88.5(3)  |            |
| N(2)-Fe(1)-N(4)  | 145.46(12) |          | 155.7(3) |            |
| N(3)-Fe(1)-N(1)  | 159.09(12) |          | 169.9(3) |            |
| N(3)-Fe(1)-N(2)  | 86.61(12)  |          | 87.9(3)  |            |
| N(3)-Fe(1)-N(4)  | 86.82(11)  |          | 90.2(3)  |            |
| N(1)-Fe(1)-Cl(1) | 100.26(9)  | 102.3(2) | 95.6(2)  | 103.18(14) |
| N(2)-Fe(1)-Cl(1) | 107.27(9)  | 94.6(2)  | 100.8(2) | 95.77(15)  |
| N(3)-Fe(1)-Cl(1) | 100.66(9)  |          | 94.4(2)  |            |
| N(4)-Fe(1)-Cl(1) | 107.27(9)  |          | 103.5(2) |            |

Table S3. Selected structural parameters for [Fe<sup>III</sup>(TDMOETPP)Cl], **1** and related species

| Complex                                 | Fe-N <sub>p</sub> <sup>a</sup> | Fe-Cl      | $\Delta_{4N}^{Fe}$ <sup>b</sup> | $\Delta_{24}^{Fe}$ <sup>c</sup> | $\Delta_{24}^d$ | Ref |
|-----------------------------------------|--------------------------------|------------|---------------------------------|---------------------------------|-----------------|-----|
| <b>1</b>                                | 2.040(3)                       | 2.2287(12) | 0.49                            | 0.52                            | 0.52            | tw  |
| <b>2</b>                                | 1.978(6)                       | 2.384(4)   | 0.29                            | 0.27                            | 0.56            | tw  |
| <b>3</b>                                | 1.960(7)                       | 2.357(3)   | 0.29                            | 0.30                            | 0.56            | tw  |
| <b>4</b>                                | 1.986(5)                       | 2.312(3)   | 0.32                            | 0.31                            | 0.56            | tw  |
| [Fe <sup>III</sup> (OMTPP)Cl]           | 2.034(6)                       | 2.24 (3)   | 0.46                            | 0.51                            | 0.51            | 9   |
| [Fe <sup>III</sup> (OETPP)Cl]           | 2.031(5)                       | 2.2418(23) | 0.47                            | 0.43                            | 0.56            | 9   |
| [Fe <sup>III</sup> (detpp)Cl]           | 2.075(4)                       | 2.220(2)   | 0.491                           | 0.54                            | 0.14            | 10  |
| [Fe <sup>III</sup> (trans-tetpp)Cl]     | 2.064(3)                       | 2.219(1)   | 0.494                           | 0.54                            | 0.35            | 10  |
| [Fe <sup>III</sup> (cis-tetpp)Cl]       | 2.065(1)                       | 2.226(1)   | 0.477                           | 0.52                            | 0.34            | 10  |
| [Fe <sup>III</sup> (hetpp)Cl]           | 2.053(2)                       | 2.239(1)   | 0.490                           | 0.52                            | 0.45            | 10  |
| [Fe <sup>III</sup> (DPP)Cl]             | 2.056(5)                       | 2.238(2)   | 0.514                           | 0.57                            | 0.47            | 11  |
| [Fe <sup>III</sup> ( <i>tn</i> -OEP)Cl] | 2.067(3)                       | 2.1918(10) | 0.46                            | 0.47                            | 0.41            | 12  |
| [Fe <sup>III</sup> (OEP)Cl]             | 2.065(3)                       | 2.243(13)  | 0.468                           | 0.518                           | 0.047           | 13  |
| [Fe <sup>III</sup> (TEtP)(Cl)]          | 2.053(3)                       | 2.2644(13) | 0.47                            | 0.45                            | 0.027           | 14  |

<sup>a</sup>Average value in Å. <sup>b</sup>Displacement of iron from mean plane containing four porphyrinic nitrogen. <sup>c</sup>Displacement of iron from mean plane containing C<sub>20</sub>N<sub>4</sub> porphyrinic core. <sup>d</sup>Average displacement of the 24 atoms from the least-squares plane of the porphyrin.

[9] R. J. Cheng, P.Y. Chen, P. R. Gau, C. C. Chen, S. M. Peng, *J. Am. Chem. Soc.* **1997**, *119*, 2563-2569.

[10] R. Weiss, J. Fischer, V. Bulach, J. A. Shelnutt, *C. R. Chimie.* **2002**, *5*, 405-416.

[11] R. Weiss, J. Fischer, V. Bulach, V. Schünemann, M. Gerdan, A. X. Trautwein, J. A. Shelnutt, C. P. Gros, A. Tabard, R. Guilard, *Inorg. Chim. Acta.* **2002**, *337*, 223-232.

[12] R. Patra, A. Chaudhary, S. K. Ghosh S. P. Rath, *Inorg. Chem.* **2008**, *47*, 8324-8335.

[13] M. K. Safo, K. E. Buentello, A. G. Oliver, W. R. Scheidt, *Acta Cryst. E.* **2010**, *66*, m733.

[14] M. Li, T. J. Neal, N. Ehlinger, C. E. Schulz, W. R. Scheidt, *J.Porphyrins Phthalocyanines* **2010**, *14*, 115.

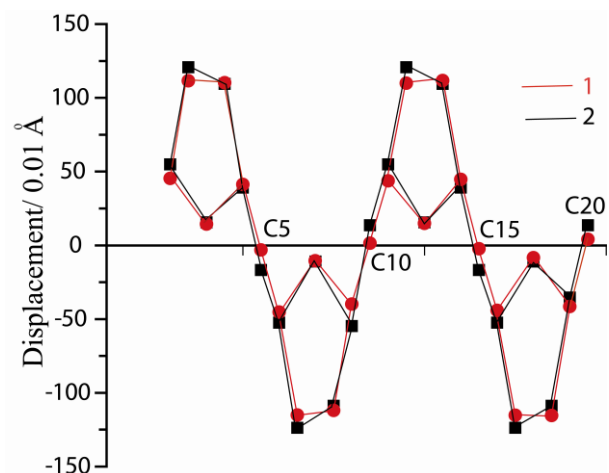

Figure S6. Atom deviations (in units of  $0.01 \text{ \AA}$ ) from the least-squares plane of the  $\text{C}_{20}\text{N}_4$  porphyrinato core of **1** and **2**. The horizontal axis represents the atom number in the macrocycle showing the bond connectivity between atoms.

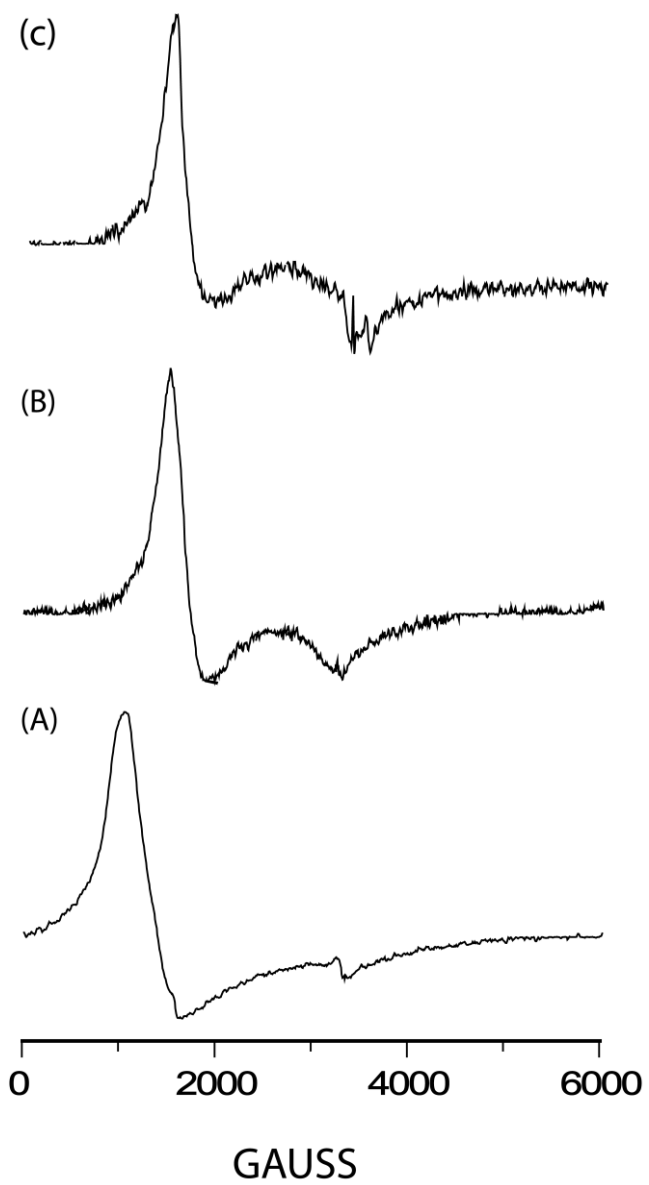

**Figure S7.** EPR spectra of (A) **1**, (B) **2** and (C) **3** in solid at 77 K.

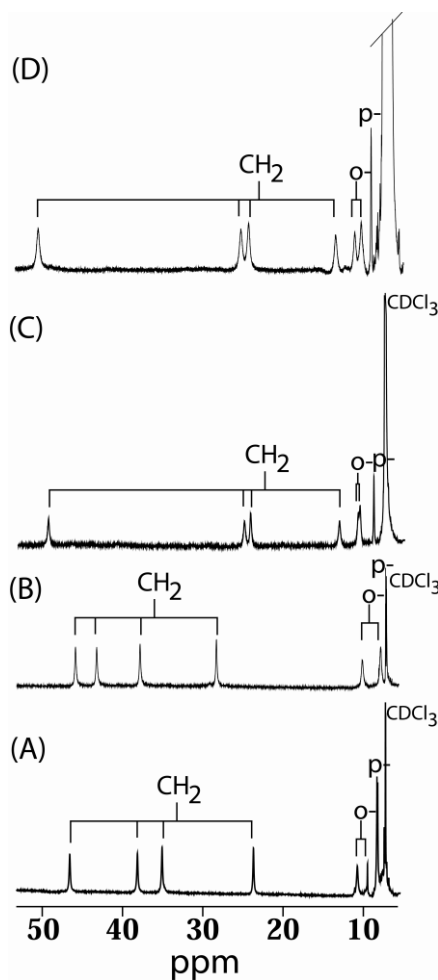

**Figure S8.**  $^1\text{H}$  NMR (at 295 K in  $\text{CDCl}_3$ ) spectra of (A) **1** and (B) five-coordinate phenolato iron(III)octaethyltetraarylporphyrin, (C) **2** and (D) **3**.

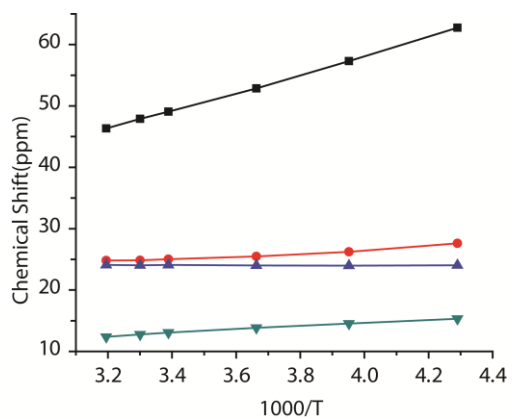

**Figure S9.** Curie plots (chemical shift versus  $1000/T$ ) of the methylene proton signals for complex **2**.

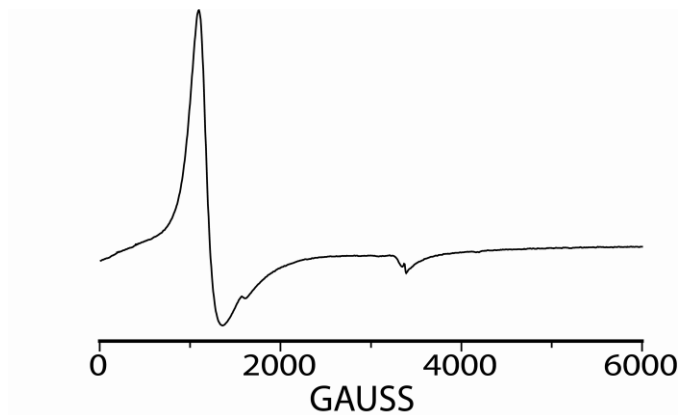

**Figure S10.** EPR spectrum of five-coordinate phenolato iron(III)octaethyltetraarylporphyrin in solid at 77 K. Simulation of the spectra gives the following values:  $g_{\perp}=5.91$  and  $g_{\parallel}=1.97$ .

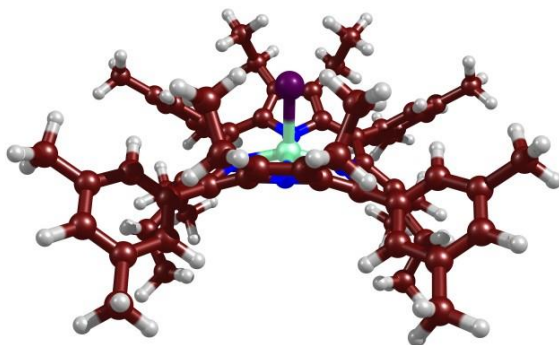

$\text{Fe,Cl} = 2.344 \{2.405\} [2.347]$   
 $\text{Fe,N}_{\text{ave}} = 1.965 \{1.975\} [2.066]$   
 $\Delta^{\text{Fe}} = 0.266 \{0.306\} [0.273]$

${}^2\text{A} \{ {}^4\text{A} \} [ {}^6\text{A} ]$

**Figure S11.** Bonding data of the complex **1** with no H bond donor calculated at B3LYP/BS1.

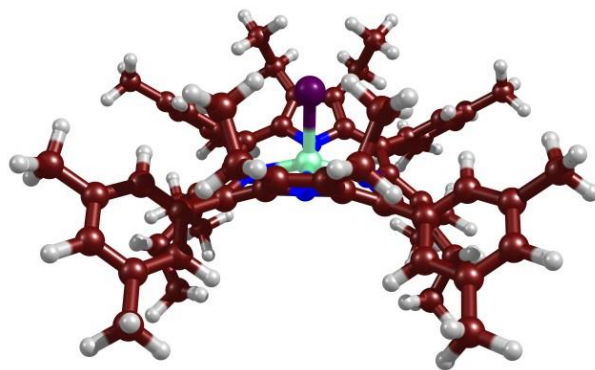

Fe,Cl = 2.290 {2.351} [2.294]  
Fe,N<sub>ave</sub> = 1.975 {1.994} [2.081]  
 $\Delta^{\text{Fe}} = 0.273$  {0.326} [0.513]

${}^2\text{A}$  { ${}^4\text{A}$ } [ ${}^6\text{A}$ ]

**Figure S12.** Bonding data of the complex **1** with no H bond donor calculated at UB3LYP/BS3.

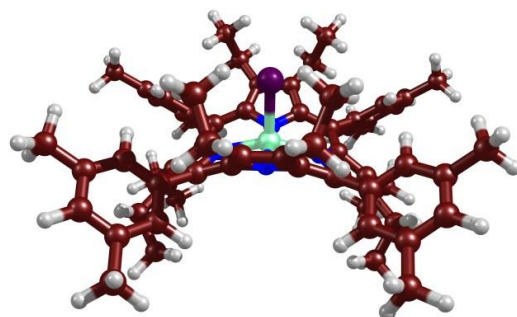

Fe,Cl = 2.320 {2.399} [2.329]  
Fe,N<sub>ave</sub> = 1.951 {1.967} [2.081]  
 $\Delta^{\text{Fe}} = 0.240$  {0.284} [0.500]

${}^2\text{A}$  { ${}^4\text{A}$ } [ ${}^6\text{A}$ ]

**Figure S13.** Bonding data of the complex **1** with no H bond donor calculated at BP86/BS1.



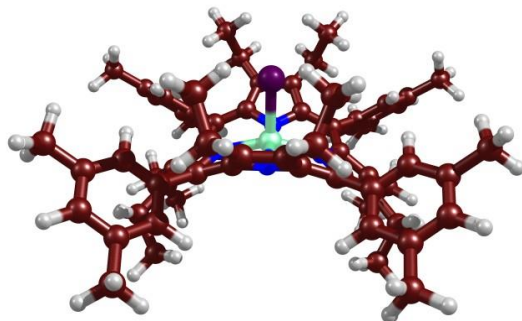

$\text{Fe,Cl} = 2.262 \{2.371\} [2.292]$   
 $\text{Fe,N}_{\text{ave}} = 1.966 \{1.973\} [2.086]$   
 $\Delta^{\text{Fe}} = 0.243 \{0.277\} [0.496]$

${}^2\text{A} \{ {}^4\text{A} \} [ {}^6\text{A} ]$

**Figure S14.** Bonding data of the complex **1** with no H bond donor calculated at BP86/BS1.

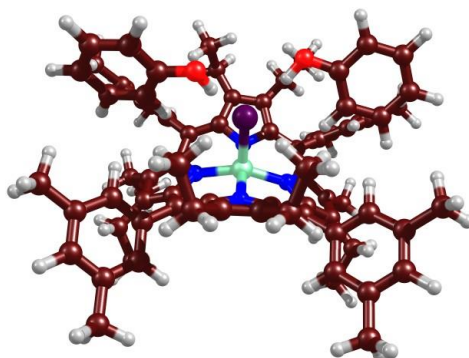

$\text{Fe,Cl} = 2.450 \{2.511\} [2.438]$   
 $\text{Fe,N}_{\text{ave}} = 1.963 \{1.963\} [2.054]$   
 $\Delta^{\text{Fe}} = 0.268 \{0.259\} [0.426]$

${}^2\text{B} \{ {}^4\text{B} \} [ {}^6\text{B} ]$

**Figure S15.** Bonding data of the complex **2** with two phenol H Donor molecules calculated at UB3LYP/BS1.

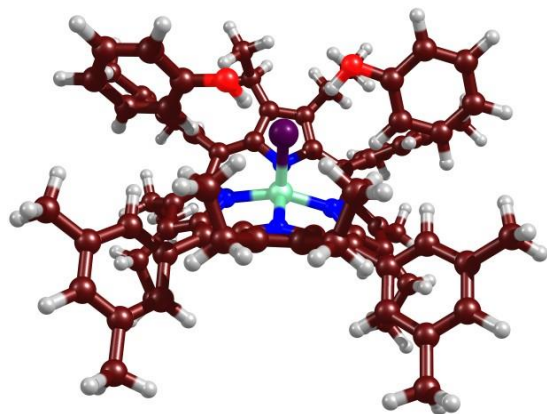

Fe,Cl = 2.554 {2.485} [2.392]  
Fe,N<sub>ave</sub> = 1.986 {1.975} [2.070]  
 $\Delta^{Fe} = 0.193$  {0.253} [0.452]

${}^2B$  { ${}^4B$ } [ ${}^6B$ ]

**Figure S16.** Bonding data of the complex **2** with two phenol H Donors added as calculated at UB3LYP/BS3.

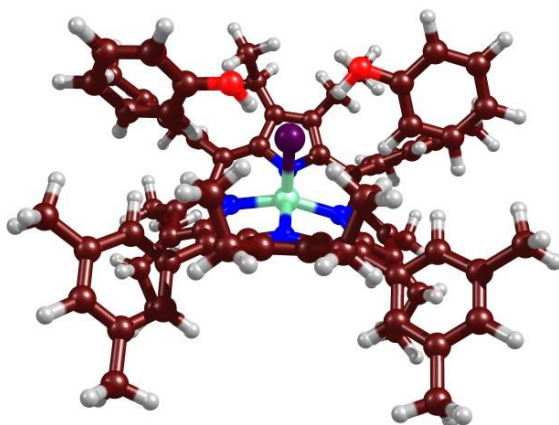

$\text{Fe,Cl} = 2.420 \{2.523\} [2.440]$   
 $\text{Fe,N}_{\text{ave}} = 1.945 \{1.946\} [2.057]$   
 $\Delta^{\text{Fe}} = 0.247 \{0.239\} [0.411]$

${}^2\text{B} \{ {}^4\text{B} \} [ {}^6\text{B} ]$

**Figure S17.** Bonding data of the complex **2** with two hydrogen bonded phenol molecules as calculated at BP86/BS1.

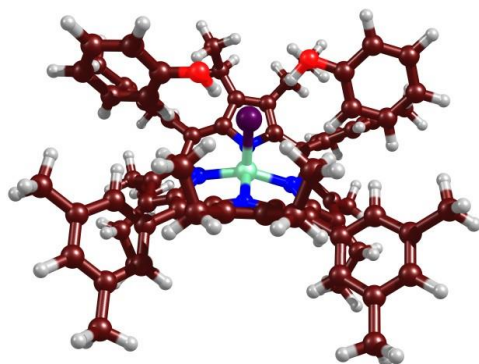

$\text{Fe,Cl} = 2.375 \{2.471\} [2.398]$   
 $\text{Fe,N}_{\text{ave}} = 1.962 \{1.969\} [2.069]$   
 $\Delta^{\text{Fe}} = 0.249 \{0.233\} [0.448]$

${}^2\text{B} \{ {}^4\text{B} \} [ {}^6\text{B} ]$

**Figure S18.** Bonding data of the complex **2** with two hydrogen bonded phenol molecules added, as calculated at UBP86/BS3.

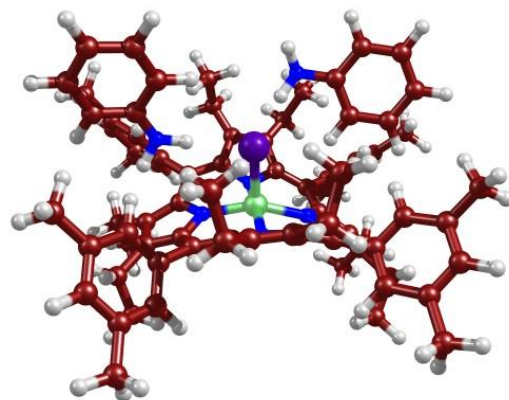

$\text{Fe,Cl} = 2.400 \{2.472\} [2.482]$   
 $\text{Fe,N}_{\text{ave}} = 1.966 \{1.967\} [1.975]$   
 $\Delta^{\text{Fe}} = 0.251 \{0.271\} [0.250]$

${}^2\text{A} \{ {}^4\text{A} \} [ {}^6\text{A} ]$

**Figure S19.** Bonding data of the complex **4** with two hydrogen bonded aniline molecules added, as calculated at UB3LYP/BS1.

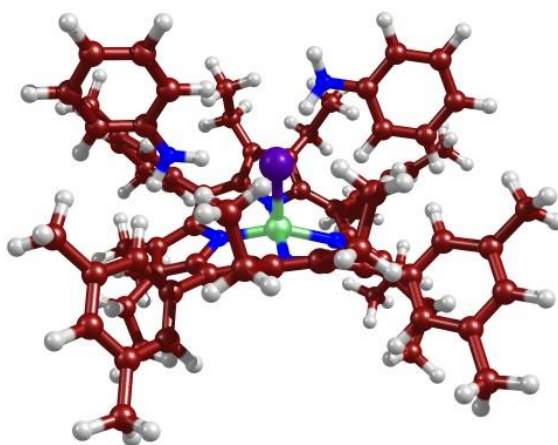

$\text{Fe,Cl} = 2.360 \{2.440\} [2.359]$   
 $\text{Fe,N}_{\text{ave}} = 1.978 \{1.983\} [2.071]$   
 $\Delta^{\text{Fe}} = 0.257 \{0.273\} [0.441]$

${}^2\text{A} \{ {}^4\text{A} \} [ {}^6\text{A} ]$

**Figure S20.** Bonding data of the complex **4** with two hydrogen bonded aniline molecules added, as calculated at UB3LYP/BS3.

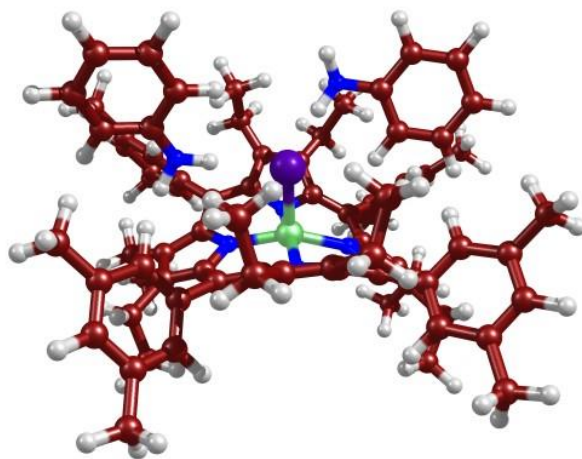

$\text{Fe,Cl} = 2.372 \{2.474\} [2.508]$   
 $\text{Fe,N}_{\text{ave}} = 1.953 \{1.956\} [1.962]$   
 $\Delta^{\text{Fe}} = 0.240 \{0.242\} [0.229]$

${}^2\text{A} \{ {}^4\text{A} \} [ {}^6\text{A} ]$

**Figure S21.** Bonding data of the complex **4** with two hydrogen bonded aniline molecules added, as calculated at UBP86/BS1.

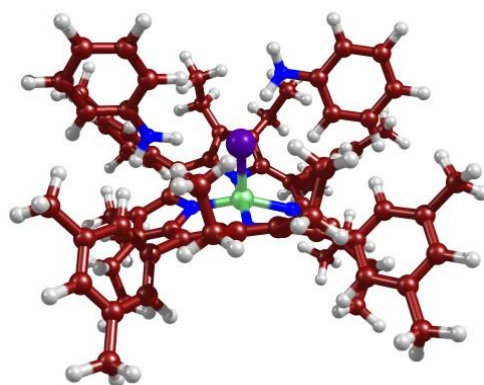

$\text{Fe,Cl} = 2.327 \{2.448\} [2.469]$   
 $\text{Fe,N}_{\text{ave}} = 1.967 \{1.970\} [1.969]$   
 $\Delta^{\text{Fe}} = 0.237 \{0.237\} [0.219]$

${}^2\text{A} \{ {}^4\text{A} \} [ {}^6\text{A} ]$

**Figure S22.** Bonding data of the complex **4** with two hydrogen bonded aniline molecules added, as calculated at UBP86/BS3.

**Table S4:** Optimized geometries of <sup>2,4,6</sup>1, <sup>2,4,6</sup>2 and <sup>2,4,6</sup>4 using different computational methods and basis sets.

|                          |       |         |               |                |       |         |               |
|--------------------------|-------|---------|---------------|----------------|-------|---------|---------------|
| <b>BS1<sub>OPT</sub></b> |       |         |               |                |       |         |               |
| <b>B3LYP</b>             | Fe,Cl | Fe,N    | $\Delta_{Fe}$ | <b>BP86</b>    | Fe,Cl | Fe,Nave | $\Delta_{Fe}$ |
| <sup>2</sup> 1           | 2.344 | 1.965   | 0.266         | <sup>2</sup> 1 | 2.320 | 1.951   | 0.240         |
| <sup>4</sup> 1           | 2.405 | 1.975   | 0.306         | <sup>4</sup> 1 | 2.400 | 1.967   | 0.284         |
| <sup>6</sup> 1           | 2.347 | 2.066   | 0.273         | <sup>6</sup> 1 | 2.329 | 2.081   | 0.500         |
| <sup>2</sup> 2           | 2.450 | 1.963   | 0.268         | <sup>2</sup> 2 | 2.420 | 1.950   | 0.247         |
| <sup>4</sup> 2           | 2.511 | 1.963   | 0.259         | <sup>4</sup> 2 | 2.523 | 1.953   | 0.239         |
| <sup>6</sup> 2           | 2.438 | 2.054   | 0.426         | <sup>6</sup> 2 | 2.440 | 2.057   | 0.411         |
| <sup>2</sup> 4           | 2.400 | 1.966   | 0.251         | <sup>2</sup> 4 | 2.372 | 1.953   | 0.240         |
| <sup>4</sup> 4           | 2.472 | 1.967   | 0.271         | <sup>4</sup> 4 | 2.474 | 1.956   | 0.242         |
| <sup>6</sup> 4           | 2.482 | 1.975   | 0.250         | <sup>6</sup> 4 | 2.508 | 1.962   | 0.229         |
| <b>BS3<sub>OPT</sub></b> |       |         |               |                |       |         |               |
| <b>B3LYP</b>             | Fe,Cl | Fe,Nave | $\Delta_{Fe}$ | <b>BP86</b>    | Fe,Cl | Fe,Nave | $\Delta_{Fe}$ |
| <sup>2</sup> 1           | 2.289 | 1.975   | 0.273         | <sup>2</sup> 1 | 2.262 | 1.966   | 0.243         |
| <sup>4</sup> 1           | 2.351 | 1.994   | 0.326         | <sup>4</sup> 1 | 2.371 | 1.973   | 0.277         |
| <sup>6</sup> 1           | 2.294 | 2.081   | 0.513         | <sup>6</sup> 1 | 2.292 | 2.086   | 0.496         |
| <sup>2</sup> 2           | 2.554 | 1.986   | 0.193         | <sup>2</sup> 2 | 2.375 | 1.962   | 0.249         |
| <sup>4</sup> 2           | 2.485 | 1.975   | 0.253         | <sup>4</sup> 2 | 2.471 | 1.969   | 0.233         |
| <sup>6</sup> 2           | 2.392 | 2.070   | 0.452         | <sup>6</sup> 2 | 2.398 | 2.069   | 0.448         |
| <sup>2</sup> 4           | 2.360 | 1.978   | 0.257         | <sup>2</sup> 4 | 2.327 | 1.967   | 0.237         |
| <sup>4</sup> 4           | 2.440 | 1.983   | 0.273         | <sup>4</sup> 4 | 2.448 | 1.970   | 0.237         |
| <sup>6</sup> 4           | 2.359 | 2.071   | 0.441         | <sup>6</sup> 4 | 2.469 | 1.969   | 0.219         |

**Table S5.** Absolute energies B3LYP/BS1 optimised

|                       | E<br>BS1  | Zero-<br>point<br>BS1 | Gibbs<br>BS1 | E<br>BS2  | E <sub>solv</sub><br>(Kcal/mol)<br>BS2 | E <sub>D3</sub><br>BS2 |
|-----------------------|-----------|-----------------------|--------------|-----------|----------------------------------------|------------------------|
| <sup>2</sup> <b>1</b> | -3439.123 | 1.282                 | -3437.965    | -3440.458 | -16.110                                | -0.221                 |
| <sup>4</sup> <b>1</b> | -3439.141 | 1.282                 | -3437.978    | -3440.477 | -18.015                                | -0.221                 |
| <sup>6</sup> <b>1</b> | -3439.130 | 1.281                 | -3437.974    | -3440.475 | -16.727                                | -0.220                 |
| <sup>2</sup> <b>2</b> | -4053.930 | 1.495                 | -4052.569    | -4055.560 | -20.126                                | -0.273                 |
| <sup>4</sup> <b>2</b> | -4053.952 | 1.495                 | -4052.594    | -4055.584 | -19.979                                | -0.271                 |
| <sup>6</sup> <b>2</b> | -4053.935 | 1.494                 | -4052.576    | -4055.575 | -20.364                                | -0.270                 |
| <sup>2</sup> <b>4</b> | -4014.215 | 1.521                 | -4012.829    | -4015.808 | -18.666                                | -0.264                 |
| <sup>4</sup> <b>4</b> | -4014.235 | 1.521                 | -4012.856    | -4015.829 | -19.771                                | -0.264                 |
| <sup>6</sup> <b>4</b> | -4014.176 | 1.517                 | -4012.797    | -4015.771 | -18.264                                | -0.262                 |

**Table S6.** Absolute energies B3LYP/BS3 optimised

|                       | E<br>BS3  | zero<br>BS3 | Gibbs<br>BS3 | E<br>BS4  | E <sub>solv</sub><br>BS4 | E <sub>D3</sub><br>BS4 |
|-----------------------|-----------|-------------|--------------|-----------|--------------------------|------------------------|
| <sup>2</sup> <b>1</b> | -3439.770 | 1.275       | -3438.613    | -3440.567 | -15.887                  | -0.223                 |
| <sup>4</sup> <b>1</b> | -3439.787 | 1.275       | -3438.629    | -3440.585 | -17.602                  | -0.223                 |
| <sup>6</sup> <b>1</b> | -3439.778 | 1.273       | -3438.626    | -3440.583 | -15.034                  | -0.222                 |
| <sup>2</sup> <b>2</b> | -4054.716 | 1.485       | -4053.369    | -4055.695 | -14.182                  | -0.275                 |
| <sup>4</sup> <b>2</b> | -4054.741 | 1.487       | -4053.389    | -4055.726 | -14.080                  | -0.273                 |
| <sup>6</sup> <b>2</b> | -4054.720 | 1.486       | -4053.371    | -4055.715 | -18.244                  | -0.270                 |
| <sup>2</sup> <b>4</b> | -4014.979 | 1.513       | -4013.604    | -4015.948 | -15.120                  | -0.281                 |
| <sup>4</sup> <b>4</b> | -4014.999 | 1.513       | -4013.623    | -4015.970 | -15.486                  | -0.280                 |
| <sup>6</sup> <b>4</b> | -4014.985 | 1.511       | -4013.618    | -4015.964 | -16.036                  | -0.275                 |

**Table S7.** Relative energies B3LYP/BS1 optimised

|                | $\Delta E$<br>[BS1] | $\Delta E_{\text{ZPE}}$<br>[BS1] | $\Delta E$<br>[BS2] | $\Delta E_{\text{ZPE}}$<br>[BS2] | $\Delta G$<br>[BS1] | $\Delta G$<br>[BS2] | $\Delta E_{\text{S+ZPE}}$<br>[BS2] | $\Delta G_{\text{S}}$<br>[BS2] | $\Delta E_{\text{D3+ZPE}}$<br>[BS2] | $\Delta G_{\text{D3}}$<br>[BS2] |
|----------------|---------------------|----------------------------------|---------------------|----------------------------------|---------------------|---------------------|------------------------------------|--------------------------------|-------------------------------------|---------------------------------|
| <sup>2</sup> 1 | 0.00                | 0.00                             | 0.00                | 0.00                             | 0.00                | 0.00                | 0.00                               | 0.00                           | 0.00                                | 0.00                            |
| <sup>4</sup> 1 | -11.29              | -11.36                           | -12.01              | -12.08                           | -8.26               | -8.98               | -13.99                             | -10.88                         | -11.78                              | -8.68                           |
| <sup>6</sup> 1 | -4.43               | -5.37                            | -10.35              | -11.29                           | -5.72               | -11.63              | -11.90                             | -12.25                         | -10.60                              | -10.94                          |
| <sup>2</sup> 2 | 0.00                | 0.00                             | 0.00                | 0.00                             | 0.00                | 0.00                | 0.00                               | 0.00                           | 0.00                                | 0.00                            |
| <sup>4</sup> 2 | -14.04              | -14.04                           | -14.62              | -14.62                           | -15.29              | -15.87              | -14.48                             | -15.72                         | -13.72                              | -14.97                          |
| <sup>6</sup> 2 | -3.24               | -4.20                            | -9.11               | -10.08                           | -4.14               | -10.01              | -10.32                             | -10.25                         | -8.42                               | -8.36                           |
| <sup>2</sup> 4 | 0.00                | 0.00                             | 0.00                | 0.00                             | 0.00                | 0.00                | 0.00                               | 0.00                           | 0.00                                | 0.00                            |
| <sup>4</sup> 4 | -12.89              | -12.57                           | -13.21              | -12.89                           | -16.85              | -17.17              | -14.00                             | -18.27                         | -12.51                              | -16.78                          |
| <sup>6</sup> 4 | 24.15               | 22.08                            | 22.95               | 20.87                            | 19.79               | 18.58               | 21.27                              | 18.99                          | 22.12                               | 19.84                           |

**Table S8.** Relative energies B3LYP/BS3 optimised

|                | $\Delta E$<br>[BS3] | $\Delta E_{\text{ZPE}}$<br>[BS3] | $\Delta E$<br>[BS4] | $\Delta E_{\text{ZPE}}$<br>[BS4] | $\Delta G$<br>[BS4] | $\Delta G$<br>[BS4] | $\Delta E_{\text{S+ZPE}}$<br>[BS4] | $\Delta G_{\text{S}}$<br>[BS4] | $\Delta E_{\text{D3+ZPE}}$<br>[BS4] | $\Delta G_{\text{D3}}$<br>[BS4] |
|----------------|---------------------|----------------------------------|---------------------|----------------------------------|---------------------|---------------------|------------------------------------|--------------------------------|-------------------------------------|---------------------------------|
| <sup>2</sup> 1 | 0.00                | 0.00                             | 0.00                | 0.00                             | 0.00                | 0.00                | 0.00                               | 0.00                           | 0.00                                | 0.00                            |
| <sup>4</sup> 1 | -10.68              | -10.69                           | -11.74              | -11.76                           | -9.83               | -10.89              | -13.47                             | -12.61                         | -11.54                              | -10.67                          |
| <sup>6</sup> 1 | -5.26               | -6.18                            | -10.49              | -11.40                           | -8.05               | -13.27              | -10.55                             | -12.42                         | -11.08                              | -12.95                          |
| <sup>2</sup> 2 | 0.00                | 0.00                             | 0.00                | 0.00                             | 0.00                | 0.00                | 0.00                               | 0.00                           | 0.00                                | 0.00                            |
| <sup>4</sup> 2 | -15.19              | -14.40                           | -19.53              | -18.74                           | -12.31              | -16.64              | -18.64                             | -16.54                         | -17.37                              | -15.27                          |
| <sup>6</sup> 2 | -2.25               | -2.00                            | -12.51              | -12.26                           | -1.40               | -11.66              | -16.32                             | -15.72                         | -8.94                               | -8.34                           |
| <sup>2</sup> 4 | 0.00                | 0.00                             | 0.00                | 0.00                             | 0.00                | 0.00                | 0.00                               | 0.00                           | 0.00                                | 0.00                            |
| <sup>4</sup> 4 | -12.71              | -12.81                           | -14.13              | -14.23                           | -11.51              | -12.93              | -14.59                             | -13.29                         | -14.12                              | -12.82                          |
| <sup>6</sup> 4 | -3.89               | -5.07                            | -10.35              | -11.52                           | -8.51               | -14.96              | -12.44                             | -15.88                         | -8.04                               | -11.48                          |



**Table S9.** Group spin densities and charges obtained from the UB3LYP/BS2/Gas-phase calculations.

| Spin           | charge |       |       |       |       |      |       |      |       |       |
|----------------|--------|-------|-------|-------|-------|------|-------|------|-------|-------|
|                | Fe     | Cl    | lig   | HD1   | HD1   | Fe   | Cl    | lig  | HD1   | HD1   |
| <sup>2</sup> 1 | 1.22   | -0.07 | -0.14 |       |       | 0.18 | -0.31 | 0.13 |       |       |
| <sup>4</sup> 1 | 2.75   | 0.25  | -0.01 |       |       | 0.20 | -0.36 | 0.16 |       |       |
| <sup>6</sup> 1 | 4.12   | 0.27  | 0.61  |       |       | 0.22 | -0.27 | 0.05 |       |       |
| <sup>2</sup> 2 | 1.31   | -0.07 | -0.23 | -0.01 | 0.00  | 0.43 | -0.46 | 0.19 | -0.08 | -0.08 |
| <sup>4</sup> 2 | 2.82   | 0.15  | 0.02  | 0.01  | 0.01  | 0.44 | -0.49 | 0.22 | -0.09 | -0.09 |
| <sup>6</sup> 2 | 4.13   | 0.16  | 0.69  | 0.01  | 0.01  | 0.51 | -0.37 | 0.04 | -0.08 | -0.09 |
| <sup>2</sup> 4 | 1.29   | -0.08 | -0.21 | 0.00  | -0.01 | 0.35 | -0.40 | 0.52 | -0.43 | -0.04 |
| <sup>4</sup> 4 | 2.80   | 0.17  | 0.01  | 0.01  | 0.01  | 0.37 | -0.44 | 0.58 | -0.45 | -0.05 |

**Table S10.** Group spin densities and charges obtained from the UBP86/BS2/Gas-phase calculations.

| Spin           | charge |       |       |       |       |       |       |      |       |       |
|----------------|--------|-------|-------|-------|-------|-------|-------|------|-------|-------|
|                | Fe     | Cl    | lig   | HD1   | HD1   | Fe    | Cl    | lig  | HD1   | HD1   |
| <sup>2</sup> 1 | 1.04   | 0.00  | -0.04 |       |       | -0.02 | -0.26 | 0.28 |       |       |
| <sup>4</sup> 1 | 2.58   | 0.31  | 0.10  |       |       | 0.01  | -0.31 | 0.29 |       |       |
| <sup>6</sup> 1 | 4.00   | 0.32  | 0.68  |       |       | 0.02  | -0.23 | 0.21 |       |       |
| <sup>2</sup> 2 | 1.04   | -0.03 | -0.01 | -0.01 | 0.00  | 0.23  | -0.42 | 0.35 | -0.08 | -0.08 |
| <sup>4</sup> 2 | 2.62   | 0.16  | 0.20  | 0.01  | 0.01  | 0.25  | -0.49 | 0.40 | -0.08 | -0.08 |
| <sup>6</sup> 2 | 4.02   | 0.17  | 0.79  | 0.01  | 0.01  | 0.35  | -0.37 | 0.18 | -0.07 | -0.08 |
| <sup>2</sup> 4 | 1.04   | -0.02 | -0.02 | 0.01  | -0.01 | 0.13  | -0.35 | 0.72 | -0.44 | -0.06 |
| <sup>4</sup> 4 | 2.61   | 0.20  | 0.18  | 0.01  | 0.01  | 0.19  | -0.39 | 0.78 | -0.51 | -0.07 |

**Table S11.** Group spin densities and charges obtained from the UB3LYP/BS2/Solvent calculations.

| Spin           | Charge |       |       |       |       | Charge |       |      |       |       |
|----------------|--------|-------|-------|-------|-------|--------|-------|------|-------|-------|
|                | Fe     | Cl    | lig   | HD1   | HD1   | Fe     | Cl    | lig  | HD1   | HD1   |
| <sup>2</sup> 1 | 1.19   | -0.06 | -0.13 |       |       | 0.27   | -0.48 | 0.21 |       |       |
| <sup>4</sup> 1 | 2.81   | 0.19  | 0.00  |       |       | 0.32   | -0.54 | 0.22 |       |       |
| <sup>6</sup> 1 | 4.13   | 0.23  | 0.64  |       |       | 0.33   | -0.42 | 0.10 |       |       |
| <sup>2</sup> 2 | 1.25   | -0.06 | -0.18 | -0.01 | 0.00  | 0.46   | -0.48 | 0.21 | -0.10 | -0.09 |
| <sup>4</sup> 2 | 2.85   | 0.13  | 0.01  | 0.01  | 0.01  | 0.50   | -0.53 | 0.23 | -0.10 | -0.10 |
| <sup>6</sup> 2 | 4.14   | 0.15  | 0.69  | 0.01  | 0.01  | 0.55   | -0.39 | 0.05 | -0.10 | -0.11 |
| <sup>2</sup> 4 | 1.23   | -0.07 | -0.16 | 0.00  | -0.01 | 0.40   | -0.41 | 0.52 | -0.46 | -0.04 |
| <sup>4</sup> 4 | 2.82   | 0.16  | 0.00  | 0.01  | 0.01  | 0.41   | -0.46 | 0.59 | -0.48 | -0.06 |

**Table S12.** Group spin densities and charges obtained from the UB3LYP/BS2/Solvent calculations.

| Spin           | Charge |       |       |       |       | Charge |       |      |       |       |
|----------------|--------|-------|-------|-------|-------|--------|-------|------|-------|-------|
|                | Fe     | Cl    | lig   | HD1   | HD1   | Fe     | Cl    | lig  | HD1   | HD1   |
| <sup>2</sup> 1 | 1.04   | -0.01 | -0.03 |       |       | 0.06   | -0.42 | 0.36 |       |       |
| <sup>4</sup> 1 | 2.63   | 0.24  | 0.14  |       |       | 0.11   | -0.51 | 0.39 |       |       |
| <sup>6</sup> 1 | 4.00   | 0.26  | 0.73  |       |       | 0.11   | -0.38 | 0.27 |       |       |
| <sup>2</sup> 2 | 1.04   | -0.03 | -0.01 | -0.01 | 0.00  | 0.28   | -0.46 | 0.38 | -0.10 | -0.10 |
| <sup>4</sup> 2 | 2.64   | 0.14  | 0.20  | 0.01  | 0.01  | 0.30   | -0.52 | 0.43 | -0.10 | -0.10 |
| <sup>6</sup> 2 | 4.02   | 0.16  | 0.80  | 0.01  | 0.01  | 0.39   | -0.40 | 0.20 | -0.09 | -0.10 |
| <sup>2</sup> 4 | 1.04   | -0.02 | -0.02 | 0.01  | -0.01 | 0.15   | -0.36 | 0.75 | -0.48 | -0.06 |
| <sup>4</sup> 4 | 2.62   | 0.18  | 0.18  | 0.01  | 0.01  | 0.22   | -0.41 | 0.81 | -0.53 | -0.09 |

**Table S13. Group spin densities and charges obtained from the UB3LYP/BS4/Gas-phase calculations.**

| Spin           | charge |       |       |      |      | charge |       |       |       |       |
|----------------|--------|-------|-------|------|------|--------|-------|-------|-------|-------|
|                | Fe     | Cl    | Lig   | HD1  | HD2  | Fe     | Cl    | lig   | HD1   | HD2   |
| <sup>2</sup> 1 | 1.21   | -0.05 | -0.16 |      |      | 0.24   | -0.34 | 0.11  |       |       |
| <sup>4</sup> 1 | 2.78   | 0.26  | -0.05 |      |      | 0.23   | -0.39 | 0.15  |       |       |
| <sup>6</sup> 1 | 4.10   | 0.29  | 0.61  |      |      | 0.25   | -0.29 | 0.04  |       |       |
| <sup>2</sup> 2 | 1.95   | -0.02 | -0.93 | 0.00 | 0.00 | 0.35   | -0.46 | 0.23  | -0.06 | -0.05 |
| <sup>4</sup> 2 | 2.83   | 0.14  | 0.02  | 0.00 | 0.00 | 0.35   | -0.42 | 0.19  | -0.06 | -0.07 |
| <sup>6</sup> 2 | 4.12   | 0.17  | 0.70  | 0.01 | 0.01 | 0.51   | -0.31 | -0.06 | -0.07 | -0.07 |
| <sup>2</sup> 4 | 1.32   | -0.07 | -0.25 | 0.00 | 0.00 | 0.33   | -0.34 | 0.34  | -0.27 | -0.05 |
| <sup>4</sup> 4 | 2.83   | 0.18  | -0.02 | 0.01 | 0.00 | 0.35   | -0.41 | 0.38  | -0.28 | -0.04 |
| <sup>6</sup> 4 | 4.12   | 0.20  | 0.67  | 0.01 | 0.00 | 0.46   | -0.29 | 0.15  | -0.27 | -0.04 |

**Table S14. Group spin densities and charges obtained from UB3LYP/BS4/Gas-phase calculations.**

| Spin Multiplicity | Charge |       |       |      |      | Charge |       |      |       |       |
|-------------------|--------|-------|-------|------|------|--------|-------|------|-------|-------|
|                   | Fe     | Cl    | lig   | HD1  | HD2  | Fe     | Cl    | lig  | HD1   | HD2   |
| <sup>2</sup> 1    | 1.04   | 0.02  | -0.06 |      |      | 0.06   | -0.31 | 0.25 |       |       |
| <sup>4</sup> 1    | 2.59   | 0.33  | 0.08  |      |      | 0.07   | -0.33 | 0.25 |       |       |
| <sup>6</sup> 1    | 3.99   | 0.34  | 0.67  |      |      | 0.09   | -0.26 | 0.17 |       |       |
| <sup>2</sup> 2    | 1.07   | -0.03 | -0.04 | 0.00 | 0.00 | 0.16   | -0.36 | 0.23 | -0.02 | 0.00  |
| <sup>4</sup> 2    | 2.64   | 0.18  | 0.17  | 0.01 | 0.01 | 0.26   | -0.44 | 0.27 | -0.04 | -0.05 |
| <sup>6</sup> 2    | 4.00   | 0.18  | 0.80  | 0.01 | 0.01 | 0.30   | -0.34 | 0.14 | -0.06 | -0.04 |
| <sup>2</sup> 4    | 1.06   | -0.02 | -0.04 | 0.00 | 0.00 | 0.16   | -0.28 | 0.49 | -0.30 | -0.07 |
| <sup>4</sup> 4    | 2.63   | 0.21  | 0.14  | 0.01 | 0.01 | 0.17   | -0.34 | 0.51 | -0.30 | -0.04 |

**Table S15. Group spin densities and charges obtained from UB3LYP/BS4/Solvent calculations.**

| Spin           |      |       |       |      |      | Charge |       |       |       |       |
|----------------|------|-------|-------|------|------|--------|-------|-------|-------|-------|
|                | Fe   | Cl    | lig   | HD1  | HD2  | Fe     | Cl    | lig   | HD1   | HD2   |
| <sup>2</sup> 1 | 1.19 | -0.04 | -0.15 |      |      | 0.33   | -0.50 | 0.17  |       |       |
| <sup>4</sup> 1 | 2.83 | 0.21  | -0.04 |      |      | 0.36   | -0.56 | 0.21  |       |       |
| <sup>6</sup> 1 | 4.11 | 0.24  | 0.65  |      |      | 0.35   | -0.42 | 0.07  |       |       |
| <sup>2</sup> 2 | 1.94 | -0.02 | -0.92 | 0.00 | 0.00 | 0.41   | -0.48 | 0.20  | -0.07 | -0.06 |
| <sup>4</sup> 2 | 2.85 | 0.14  | 0.00  | 0.00 | 0.00 | 0.41   | -0.43 | 0.14  | -0.06 | -0.07 |
| <sup>6</sup> 2 | 4.13 | 0.16  | 0.70  | 0.01 | 0.01 | 0.55   | -0.33 | -0.05 | -0.08 | -0.09 |
| <sup>2</sup> 4 | 1.27 | -0.06 | -0.20 | 0.00 | 0.00 | 0.37   | -0.36 | 0.37  | -0.32 | -0.06 |
| <sup>4</sup> 4 | 2.84 | 0.18  | -0.03 | 0.01 | 0.00 | 0.40   | -0.43 | 0.40  | -0.33 | -0.04 |
| <sup>6</sup> 4 | 4.14 | 0.20  | 0.65  | 0.01 | 0.00 | 0.50   | -0.30 | 0.17  | -0.32 | -0.05 |

**Table S16. Group spin densities and charges obtained from UBP86/BS4/Solvent calculations.**

| Spin           |      |       |       |      |      | Charge |       |      |       |       |
|----------------|------|-------|-------|------|------|--------|-------|------|-------|-------|
|                | Fe   | Cl    | lig   | HD1  | HD2  | Fe     | Cl    | lig  | HD1   | HD2   |
| <sup>2</sup> 1 | 1.05 | 0.01  | -0.06 |      |      | 0.15   | -0.46 | 0.31 |       |       |
| <sup>4</sup> 1 | 2.62 | 0.26  | 0.12  |      |      | 0.17   | -0.51 | 0.34 |       |       |
| <sup>6</sup> 1 | 3.99 | 0.29  | 0.73  |      |      | 0.18   | -0.40 | 0.22 |       |       |
| <sup>2</sup> 2 | 1.24 | -0.03 | -0.21 | 0.00 | 0.00 | 0.20   | -0.37 | 0.22 | -0.04 | -0.02 |
| <sup>4</sup> 2 | 2.66 | 0.15  | 0.17  | 0.01 | 0.01 | 0.32   | -0.47 | 0.29 | -0.06 | -0.07 |
| <sup>6</sup> 2 | 4.01 | 0.17  | 0.81  | 0.01 | 0.01 | 0.34   | -0.36 | 0.14 | -0.07 | -0.05 |
| <sup>2</sup> 4 | 1.05 | -0.02 | -0.03 | 0.00 | 0.00 | 0.18   | -0.29 | 0.52 | -0.35 | -0.07 |
| <sup>4</sup> 4 | 2.64 | 0.20  | 0.14  | 0.01 | 0.01 | 0.23   | -0.36 | 0.53 | -0.35 | -0.05 |

**Table S17. Bonding data for complex 2 throughout scan, whereby the Cl–HO distance is fixed.**

| <b><sup>2</sup>B3LYP</b> | Fe,Cl | Fe,H <sub>Sub</sub> | Fe,N <sub>ave</sub> | Δ <sub>Fe</sub> | <b><sup>2</sup>BP86</b> | Fe,Cl | Fe,H <sub>Sub</sub> | Fe,N <sub>ave</sub> | Δ <sub>Fe</sub> |
|--------------------------|-------|---------------------|---------------------|-----------------|-------------------------|-------|---------------------|---------------------|-----------------|
| scan01                   | 2.436 | 2.284               | 1.964               | 0.261           | scan01                  | 2.41  | 2.28                | 1.95                | 0.25            |
| scan02                   | 2.435 | 2.384               | 1.964               | 0.261           | scan02                  | 2.41  | 2.38                | 1.95                | 0.25            |
| scan03                   | 2.428 | 2.484               | 1.966               | 0.259           | scan03                  | 2.40  | 2.48                | 1.95                | 0.25            |
| scan04                   | 2.419 | 2.584               | 1.965               | 0.258           | scan04                  | 2.39  | 2.58                | 1.95                | 0.25            |
| scan05                   | 2.417 | 2.684               | 1.964               | 0.260           | scan05                  | 2.38  | 2.68                | 1.95                | 0.25            |
| scan06                   | 2.410 | 2.784               | 1.964               | 0.259           | scan06                  | 2.38  | 2.78                | 1.95                | 0.25            |
| scan07                   | 2.405 | 2.884               | 1.966               | 0.258           | scan07                  | 2.38  | 2.88                | 1.95                | 0.25            |
| scan08                   | 2.399 | 2.984               | 1.966               | 0.257           | scan08                  | 2.38  | 2.98                | 1.95                | 0.25            |
| <b><sup>4</sup>B3LYP</b> | Fe,Cl | Fe,H <sub>Sub</sub> | Fe,N <sub>ave</sub> | Δ <sub>Fe</sub> | <b><sup>4</sup>BP86</b> | Fe,Cl | Fe,H <sub>Sub</sub> | Fe,N <sub>ave</sub> | Δ <sub>Fe</sub> |
| scan01                   | 2.50  | 2.28                | 1.96                | 0.27            | scan01                  | 2.51  | 2.28                | 1.95                | 0.24            |
| scan02                   | 2.49  | 2.38                | 1.96                | 0.27            | scan02                  | 2.50  | 2.38                | 1.95                | 0.25            |
| scan03                   | 2.49  | 2.48                | 1.97                | 0.27            | scan03                  | 2.50  | 2.48                | 1.96                | 0.25            |
| scan04                   | 2.48  | 2.58                | 1.97                | 0.27            | scan04                  | 2.49  | 2.58                | 1.96                | 0.25            |
| scan05                   | 2.48  | 2.68                | 1.97                | 0.28            | scan05                  | 2.48  | 2.68                | 1.96                | 0.25            |
| scan06                   | 2.47  | 2.78                | 1.97                | 0.28            | scan06                  | 2.48  | 2.78                | 1.96                | 0.25            |
| scan07                   | 2.47  | 2.88                | 1.97                | 0.28            | scan07                  | 2.47  | 2.88                | 1.96                | 0.26            |
| scan08                   | 2.46  | 2.98                | 1.97                | 0.28            | scan08                  | 2.47  | 2.98                | 1.96                | 0.26            |
| <b><sup>6</sup>B3LYP</b> | Fe,Cl | Fe,H <sub>Sub</sub> | Fe,N <sub>ave</sub> | Δ <sub>Fe</sub> | <b><sup>6</sup>BP86</b> | Fe,Cl | Fe,H <sub>Sub</sub> | Fe,N <sub>ave</sub> | Δ <sub>Fe</sub> |
| scan01                   | 2.430 | 2.284               | 2.055               | 0.429           | scan01                  | 2.430 | 2.281               | 2.058               | 0.417           |
| scan02                   | 2.424 | 2.384               | 2.056               | 0.432           | scan02                  | 2.424 | 2.381               | 2.061               | 0.428           |
| scan03                   | 2.419 | 2.484               | 2.057               | 0.442           | scan03                  | 2.418 | 2.481               | 2.063               | 0.428           |
| scan04                   | 2.413 | 2.584               | 2.057               | 0.437           | scan04                  | 2.413 | 2.581               | 2.065               | 0.427           |
| scan05                   | 2.409 | 2.684               | 2.058               | 0.444           | scan05                  | 2.407 | 2.681               | 2.064               | 0.432           |
| scan06                   | 2.404 | 2.784               | 2.058               | 0.443           | scan06                  | 2.405 | 2.781               | 2.067               | 0.432           |
| scan07                   | 2.401 | 2.884               | 2.060               | 0.444           | scan07                  | 2.400 | 2.881               | 2.068               | 0.433           |
| scan08                   | 2.397 | 2.984               | 2.061               | 0.443           | scan08                  | 2.395 | 2.981               | 2.068               | 0.429           |

**Table S18. Orbital energies for  ${}^4,6_1$ ,  ${}^4,6_2$  and  ${}^4,6_4$  (in au) as obtained from UB3LYP/BS3.**

|                    | ${}^6_1$ |         | ${}^6_2$ |         | ${}^6_4$ |         | ${}^4_1$ |         | ${}^4_2$ |         | ${}^4_4$ |         |
|--------------------|----------|---------|----------|---------|----------|---------|----------|---------|----------|---------|----------|---------|
|                    | alpha    | beta    | alpha    | beta    | alpha    | beta    | alpha    | beta    | alpha    | beta    | alpha    | beta    |
| $\delta_{xy}$      | -0.3103  | -0.0938 | -0.3865  | -0.1062 | -0.3866  | -0.1035 | -0.3027  | -0.2421 | -0.3120  | -0.2561 | -0.3127  | -0.2568 |
| $\sigma^*_{z2}$    | -0.2680  | -0.0895 | -0.2888  | -0.1152 | -0.2819  | -0.1066 | -0.2106  | -0.0642 | -0.2668  | -0.0871 | -0.2637  | -0.0848 |
| $\pi^*_{yz}$       | -0.2479  | -0.0827 | -0.2751  | -0.0957 | -0.2680  | -0.0934 | -0.2242  | -0.0525 | -0.2544  | -0.0933 | -0.2475  | -0.0941 |
| $\pi^*_{xz}$       | -0.2476  | -0.0964 | -0.2756  | -0.1101 | -0.2700  | -0.1084 | -0.2221  | -0.0466 | -0.2597  | -0.0985 | -0.2502  | -0.0980 |
| $\sigma^*_{x2-y2}$ | -0.2328  | -0.0469 | -0.2430  | -0.0541 | -0.2393  | -0.0518 | -0.0782  | -0.0071 | -0.0858  | -0.0103 | -0.0886  | -0.0123 |
| $a_{1u}$           | -0.1780  |         | -0.1885  |         | -0.1860  |         | -0.1786  |         | -0.1841  |         | -0.1883  |         |
| $a_{2u}$           | -0.1701  |         | -0.1823  |         | -0.1779  |         | -0.1753  |         | -0.1820  |         | -0.1840  |         |

# Cartesians

## ${}^2_1\{B3LYP\}_{optB51}$

|    |              |              |               |
|----|--------------|--------------|---------------|
| 6  | 8.164658670  | 30.097718357 | 31.142833509  |
| 6  | 7.654562539  | 30.090199747 | 29.721589063  |
| 1  | 6.784003660  | 29.063998845 | 29.337251640  |
| 1  | 6.610499014  | 30.402721463 | 29.677215166  |
| 6  | 8.485335331  | 30.989701685 | 28.775988320  |
| 1  | 6.090047827  | 30.941894440 | 29.753841965  |
| 1  | 8.455878425  | 32.034457008 | 29.103456815  |
| 1  | 9.534767238  | 30.674867278 | 28.752801638  |
| 6  | 9.528534975  | 27.924918356 | 30.967220119  |
| 1  | 8.89036183   | 27.715402634 | 30.102202595  |
| 6  | 10.981006097 | 28.118762370 | 30.470888731  |
| 1  | 11.324702817 | 27.229050229 | 29.929486525  |
| 1  | 11.056388080 | 28.980164533 | 29.797717529  |
| 6  | 9.594582353  | 32.205940404 | 31.234472306  |
| 6  | 5.614344737  | 33.113385424 | 30.168163730  |
| 6  | 6.598191491  | 33.847921012 | 30.007385541  |
| 6  | 4.703468447  | 33.081043411 | 29.310219470  |
| 6  | 3.703528163  | 32.122429709 | 29.543189493  |
| 1  | 2.840493672  | 32.085457742 | 28.882733316  |
| 6  | 3.791585317  | 31.207754029 | 30.600533568  |
| 6  | 4.919494842  | 31.255182221 | 31.446084047  |
| 6  | 4.575625857  | 30.074640375 | 28.174180307  |
| 1  | 5.554908940  | 34.334628017 | 27.578654000  |
| 1  | 3.956771894  | 33.677002178 | 27.362703716  |
| 1  | 4.108209840  | 35.009162743 | 27.561412447  |
| 6  | 2.682160754  | 30.208045996 | 30.858289578  |
| 1  | 1.895822862  | 30.639875375 | 31.492710254  |
| 1  | 2.207911897  | 29.892029153 | 30.922414315  |
| 1  | 3.056823570  | 29.314372622 | 31.368166342  |
| 6  | 10.082004782 | 24.579236661 | 33.840305664  |
| 1  | 10.124455041 | 23.494527535 | 33.775689158  |
| 1  | 12.617096071 | 24.609339916 | 33.718885090  |
| 1  | 13.015912165 | 24.377117020 | 34.711788383  |
| 1  | 12.532842163 | 23.663070659 | 33.173642673  |
| 6  | 7.550640212  | 24.404281754 | 33.959306320  |
| 1  | 7.741905352  | 23.351834192 | 31.916956842  |
| 1  | 7.048989027  | 24.441007225 | 32.982812198  |
| 6  | 9.599218443  | 23.233787814 | 34.456865208  |
| 7  | 8.560915660  | 33.632118135 | 33.544148120  |
| 6  | 8.885877976  | 30.903466345 | 33.198377708  |
| 7  | 10.742072136 | 30.853343589 | 35.244633587  |
| 7  | 10.885795560 | 33.611857565 | 35.030452925  |
| 17 | 8.122280202  | 32.233052199 | 36.276715770  |
| 6  | 8.527690409  | 34.955268745 | 33.978141083  |
| 6  | 7.164247069  | 35.462629247 | 33.868274895  |
| 6  | 6.410022316  | 34.468042640 | 32.26265346   |
| 6  | 7.315387015  | 33.357700687 | 32.861331141  |
| 6  | 7.125993044  | 32.245643432 | 32.145152128  |
| 6  | 8.035996907  | 31.168443148 | 32.125414054  |
| 6  | 8.991705309  | 29.132351628 | 33.698179552  |
| 6  | 9.362080937  | 29.600690610 | 33.029543664  |
| 6  | 9.915425492  | 28.866492264 | 34.097289952  |
| 6  | 10.400014846 | 29.502804361 | 35.255775000  |
| 6  | 10.761168112 | 28.929021548 | 36.546877371  |
| 6  | 11.419752451 | 29.919700055 | 37.262067221  |
| 6  | 11.482514558 | 31.096783706 | 36.402056050  |
| 6  | 12.270962618 | 32.252468726 | 36.529403825  |
| 6  | 12.086324846 | 33.375144844 | 35.693139389  |
| 6  | 12.972587470 | 34.518741957 | 35.490454973  |
| 6  | 12.241109894 | 35.487093394 | 34.823028760  |
| 6  | 10.898435827 | 34.948115142 | 34.628351588  |
| 6  | 9.711654698  | 35.638240128 | 34.310229998  |
| 6  | 6.605203093  | 36.740679629 | 34.446899273  |
| 1  | 5.660369372  | 36.978842695 | 35.944033501  |
| 1  | 7.268306101  | 37.585082053 | 34.329373940  |
| 6  | 6.345733323  | 36.646474794 | 35.969637041  |
| 1  | 5.933702183  | 37.590454381 | 36.347452415  |
| 1  | 5.637598208  | 35.843635967 | 36.200395403  |
| 1  | 7.272798882  | 36.434500527 | 36.511213624  |
| 6  | 4.908284912  | 34.492366828 | 33.106910853  |
| 1  | 4.55687329   | 35.527157178 | 33.190014883  |
| 1  | 4.605191318  | 34.149413007 | 32.116058867  |
| 6  | 4.181719696  | 33.637808547 | 34.173593229  |
| 1  | 3.094719900  | 33.705938321 | 34.041865715  |
| 1  | 4.471148845  | 32.585037393 | 34.096823971  |
| 1  | 4.429789327  | 33.974919283 | 35.185342356  |
| 1  | 9.488158386  | 27.033270551 | 31.594075147  |
| 1  | 11.661973862 | 28.289472789 | 31.311688264  |
| 6  | 10.364790700 | 27.581638189 | 37.101476963  |
| 1  | 10.513204846 | 26.793469958 | 36.362268401  |
| 1  | 11.022368558 | 27.333108842 | 37.942774536  |
| 6  | 8.897786811  | 27.538238564 | 37.591657359  |
| 1  | 8.657634311  | 26.546628865 | 37.994739352  |
| 1  | 8.721565690  | 28.281508341 | 36.772676735  |
| 1  | 8.204248639  | 27.752190568 | 36.772013291  |
| 6  | 11.814782485 | 29.819981176 | 38.715965807  |
| 1  | 11.871217090 | 28.763032292 | 39.000999374  |
| 1  | 12.810504890 | 30.232047500 | 38.887011348  |
| 6  | 10.812232957 | 30.532073117 | 39.656411320  |
| 1  | 11.124484429 | 30.420849918 | 40.702144133  |
| 1  | 10.751344415 | 31.600659803 | 39.4427632491 |
| 1  | 9.805693611  | 30.114579257 | 39.549216541  |
| 6  | 14.451610452 | 34.596641709 | 35.789476401  |
| 1  | 14.763610299 | 35.647478048 | 35.781107348  |
| 1  | 14.673663892 | 34.225751863 | 36.791318921  |
| 6  | 15.313674653 | 33.818353239 | 34.767476505  |

|   |              |              |              |
|---|--------------|--------------|--------------|
| 1 | 16.379106130 | 33.914126043 | 35.009860336 |
| 1 | 15.058610620 | 32.753144732 | 34.771057672 |
| 1 | 15.158189124 | 34.191711573 | 35.750877442 |
| 6 | 12.806822188 | 36.765191679 | 34.253670549 |
| 1 | 12.154293461 | 37.615200045 | 34.462107943 |
| 1 | 13.759683817 | 36.988243131 | 34.747578236 |
| 6 | 13.048354095 | 36.688161322 | 32.727576362 |
| 1 | 13.481579759 | 37.625441610 | 32.358064593 |
| 1 | 13.735133158 | 35.871317069 | 32.478409538 |
| 1 | 12.109446222 | 36.512886777 | 32.191631592 |
| 1 | 5.015372950  | 30.548887338 | 32.259802831 |
| 6 | 9.973167755  | 27.372469455 | 34.005092163 |
| 6 | 8.792814766  | 26.611911150 | 34.025726554 |
| 1 | 7.837064633  | 27.121645457 | 34.104735385 |
| 6 | 8.832386143  | 25.210236619 | 33.948880951 |
| 6 | 11.279998974 | 25.314135747 | 33.812878098 |
| 6 | 11.210353649 | 26.712457329 | 33.900646807 |
| 1 | 12.123829842 | 27.299907003 | 33.888695396 |
| 1 | 13.360703997 | 25.230057422 | 33.207884790 |
| 6 | 13.337542358 | 32.306855700 | 37.579122551 |
| 6 | 13.210250326 | 33.184276509 | 38.667445313 |
| 1 | 12.330546958 | 33.817507508 | 38.735919770 |
| 6 | 14.197858394 | 33.250312939 | 39.664929773 |
| 1 | 15.325013675 | 42.262807022 | 39.548240073 |
| 6 | 16.096249453 | 32.466168788 | 40.314046774 |
| 6 | 15.481652321 | 31.536602781 | 38.466920104 |
| 6 | 14.477208750 | 31.488644506 | 37.490249503 |
| 1 | 14.573652631 | 30.804281056 | 36.651044504 |
| 6 | 16.698021977 | 30.639189739 | 38.380441083 |
| 1 | 16.623598624 | 29.799992818 | 39.085170655 |
| 1 | 16.812172163 | 30.217345417 | 37.377005228 |
| 1 | 17.616842557 | 31.185170156 | 38.624326556 |
| 6 | 14.055024604 | 34.213959671 | 40.824274371 |
| 1 | 13.013492332 | 34.286365414 | 41.156301351 |
| 1 | 14.662709478 | 33.903010514 | 41.680733097 |
| 1 | 14.376829230 | 35.225962734 | 40.542695906 |
| 6 | 9.708044390  | 37.134663007 | 34.350883290 |
| 6 | 9.538608485  | 37.878630323 | 33.168745257 |
| 1 | 9.404989387  | 37.354029232 | 32.727671031 |
| 6 | 9.529644589  | 39.280112796 | 33.189109759 |
| 6 | 9.683877228  | 39.934769627 | 34.424616359 |
| 6 | 9.851330583  | 39.219918543 | 35.620830391 |
| 6 | 9.864827455  | 37.815583886 | 35.568659626 |
| 1 | 9.991958000  | 37.242823319 | 36.482170723 |
| 1 | 6.842518586  | 24.791202342 | 34.700726232 |
| 6 | 10.035100258 | 39.942962322 | 36.939168127 |
| 1 | 11.098545707 | 40.060633276 | 37.183313753 |
| 1 | 9.592556928  | 40.943621108 | 36.911574323 |
| 1 | 9.572962934  | 39.389806509 | 34.350858086 |
| 6 | 9.359190742  | 40.772515515 | 31.913996613 |
| 1 | 8.526479021  | 40.978236942 | 32.000367719 |
| 1 | 10.256461935 | 40.655413990 | 31.675151537 |
| 1 | 9.143808121  | 39.424285231 | 31.061089689 |
| 1 | 9.667065487  | 41.022029868 | 34.454820633 |

## ${}^2_1\{B3LYP\}_{optB53}$

|    |              |              |              |
|----|--------------|--------------|--------------|
| 6  | 8.182144198  | 30.062120308 | 31.176253065 |
| 6  | 7.701205577  | 30.032484056 | 29.745178374 |
| 1  | 7.711453850  | 28.996718728 | 29.388439375 |
| 1  | 6.665433527  | 30.363584057 | 29.669149990 |
| 6  | 8.570415286  | 30.887406924 | 28.801921164 |
| 1  | 8.195147045  | 30.829030136 | 27.772512804 |
| 1  | 8.562320316  | 31.93995743  | 29.105516897 |
| 1  | 9.612722597  | 30.547388953 | 28.804478637 |
| 6  | 9.553086113  | 27.895688446 | 31.054701493 |
| 1  | 9.849868315  | 27.687679126 | 30.165080399 |
| 6  | 11.019046220 | 28.085856659 | 36.180816066 |
| 1  | 11.383305519 | 27.194586998 | 30.092181052 |
| 1  | 11.123975727 | 28.945201615 | 29.945891345 |
| 6  | 6.004519870  | 32.213821352 | 31.168599211 |
| 6  | 5.960516918  | 33.118847964 | 30.099317220 |
| 1  | 6.771575492  | 33.833652796 | 29.978041700 |
| 6  | 4.898578042  | 33.112827936 | 29.188562556 |
| 6  | 3.868651104  | 32.182016019 | 29.372175510 |
| 1  | 3.038717812  | 32.163569927 | 28.666670522 |
| 6  | 3.877658255  | 31.271708650 | 30.436962854 |
| 6  | 4.959182922  | 31.293442515 | 31.324304004 |
| 6  | 4.854612810  | 34.104482498 | 28.046963664 |
| 1  | 5.858332072  | 34.320221577 | 27.663734523 |
| 1  | 4.247214349  | 33.731565221 | 27.214669211 |
| 1  | 4.418160268  | 35.060502124 | 28.367098011 |
| 6  | 2.738570737  | 30.298901817 | 30.623895508 |
| 1  | 1.965319039  | 30.721536222 | 31.291610393 |
| 1  | 2.251404163  | 30.051534876 | 29.681462429 |
| 1  | 3.077873587  | 29.365250291 | 31.093167195 |
| 6  | 9.953579847  | 24.601739866 | 33.977781491 |
| 1  | 9.970361427  | 23.513429760 | 33.930812625 |
| 6  | 12.482804204 | 24.565832022 | 33.834109845 |
| 1  | 12.890732535 | 24.355744983 | 34.832039114 |
| 6  | 12.369251049 | 23.604481886 | 33.320789956 |
| 6  | 7.423743108  | 24.488788983 | 34.124402485 |
| 1  | 7.589426677  | 23.435228997 | 34.373670984 |
| 1  | 6.913779381  | 24.522362512 | 33.152154586 |
| 26 | 9.571652211  | 32.240244653 | 34.486822499 |
| 6  | 8.545044194  | 33.632399868 | 35.536516693 |
| 7  | 8.859529362  | 30.889484176 | 33.231943136 |

|    |              |              |              |
|----|--------------|--------------|--------------|
| 7  | 10.744360747 | 30.867289770 | 35.264738742 |
| 7  | 8.843635015  | 33.641292109 | 35.086934364 |
| 17 | 8.122119804  | 32.231006289 | 36.258992271 |
| 6  | 8.478949325  | 34.939210669 | 33.976872480 |
| 6  | 7.120491795  | 35.438615787 | 33.835289110 |
| 6  | 6.396005745  | 34.439738675 | 33.216117745 |
| 6  |              |              |              |





6<sub>1</sub>{B3LYP}optBS1

|    |              |              |               |
|----|--------------|--------------|---------------|
| 1  | 9.527837765  | 41.014355352 | 34.604863737  |
| 6  | 8.167565783  | 30.070667871 | 31.128567828  |
| 7  | 6.998986482  | 30.046579823 | 29.692699579  |
| 1  | 7.722138368  | 29.014275483 | 29.325327931  |
| 1  | 6.660302666  | 30.370035623 | 29.610262196  |
| 6  | 8.568986836  | 30.920699318 | 28.758739016  |
| 1  | 8.202773679  | 30.863235753 | 27.726569660  |
| 1  | 8.545525639  | 31.970474141 | 29.070107353  |
| 1  | 9.613827908  | 30.591208379 | 28.770517275  |
| 6  | 9.469141700  | 27.856838498 | 31.02589529   |
| 1  | 8.829710838  | 27.638737283 | 30.162333451  |
| 1  | 10.928247971 | 28.006936179 | 30.531853961  |
| 1  | 11.256280929 | 27.094708848 | 30.018258316  |
| 1  | 11.024464586 | 28.846518742 | 29.833798219  |
| 6  | 5.985143317  | 32.200566747 | 31.119644345  |
| 6  | 5.868180641  | 33.046686781 | 30.005743460  |
| 1  | 6.647044187  | 33.778428093 | 29.811415770  |
| 6  | 4.765130766  | 32.955975858 | 29.139535840  |
| 3  | 3.772743023  | 32.002110454 | 29.13634927   |
| 1  | 2.916658035  | 31.922081669 | 28.747110074  |
| 6  | 3.858758446  | 31.145540102 | 30.526035688  |
| 6  | 4.974131015  | 31.253128873 | 31.367489803  |
| 6  | 4.642121893  | 33.886080077 | 27.950671359  |
| 1  | 5.620627691  | 34.097986142 | 27.50577513   |
| 1  | 4.001878419  | 33.457871414 | 27.172438057  |
| 1  | 4.202798894  | 34.849710974 | 28.243155130  |
| 6  | 2.769872178  | 30.129228447 | 30.800053446  |
| 1  | 1.803472684  | 30.617774463 | 30.978945512  |
| 1  | 2.634998403  | 29.448719514 | 29.949792511  |
| 3  | 3.003827242  | 29.522646793 | 31.680097169  |
| 6  | 9.967303274  | 24.565831400 | 33.959147173  |
| 1  | 9.988483206  | 23.479271287 | 33.918260718  |
| 6  | 12.50055887  | 24.545256519 | 33.797447363  |
| 1  | 12.911384959 | 24.328836956 | 34.793070404  |
| 1  | 12.389932860 | 23.588291646 | 33.276131516  |
| 6  | 7.435648955  | 24.441342381 | 34.127035919  |
| 1  | 7.613180034  | 23.388027703 | 34.362718645  |
| 1  | 6.909019377  | 24.476719953 | 33.163592316  |
| 26 | 9.454148411  | 32.254842569 | 34.608175881  |
| 7  | 8.555019506  | 33.712325265 | 33.447812239  |
| 7  | 8.841637756  | 30.885455459 | 33.919216763  |
| 7  | 10.806124885 | 30.826639432 | 35.248957267  |
| 7  | 10.874693406 | 33.667389750 | 35.10430121   |
| 17 | 7.910361797  | 32.160759958 | 36.37344797   |
| 6  | 8.512363402  | 35.024808888 | 33.906988978  |
| 6  | 7.152995438  | 35.539534634 | 33.730529563  |
| 6  | 6.425908636  | 34.555722647 | 33.073027039  |
| 6  | 7.336409404  | 33.433813672 | 32.839584523  |
| 6  | 7.165289168  | 32.281181789 | 32.039606673  |
| 6  | 8.043780026  | 31.167151293 | 32.087745136  |
| 6  | 8.953973565  | 29.093289296 | 31.723810166  |
| 6  | 9.311889354  | 29.579997416 | 33.055670404  |
| 6  | 9.885780962  | 28.860623267 | 33.13255831   |
| 6  | 10.432015015 | 29.488204651 | 35.275521399  |
| 6  | 10.820717667 | 28.916574799 | 36.565015942  |
| 6  | 11.517707445 | 29.901677187 | 37.23549097   |
| 6  | 11.568465791 | 31.077154387 | 36.385083393  |
| 6  | 12.334853039 | 32.257805904 | 36.501613164  |
| 6  | 12.102342808 | 33.409762803 | 35.70928906   |
| 6  | 12.974094029 | 34.565343245 | 35.507294751  |
| 6  | 12.213703438 | 35.546123286 | 34.884288161  |
| 6  | 10.870018893 | 34.999428587 | 34.702758833  |
| 6  | 9.682063496  | 35.685605913 | 34.341897681  |
| 6  | 6.563020038  | 36.809386967 | 34.297051121  |
| 1  | 5.643492295  | 37.051970512 | 35.715407636  |
| 1  | 7.232951335  | 37.658683228 | 34.147610676  |
| 6  | 6.228319227  | 36.698153118 | 35.806128237  |
| 1  | 5.791175555  | 37.635824398 | 36.168870933  |
| 1  | 5.515011819  | 35.889053176 | 35.992923426  |
| 1  | 7.128477708  | 36.489031779 | 36.390555617  |
| 6  | 4.935864747  | 34.605166522 | 32.830520108  |
| 1  | 4.603428701  | 35.649533358 | 32.854544339  |
| 1  | 4.684672681  | 34.232209712 | 31.836611641  |
| 4  | 4.126630963  | 33.806404087 | 33.880742519  |
| 1  | 3.052064636  | 33.886509402 | 33.675694089  |
| 1  | 4.399719165  | 32.746683395 | 33.863690817  |
| 1  | 4.313655460  | 34.180524582 | 34.892688628  |
| 1  | 9.405723693  | 26.982392391 | 31.673928273  |
| 1  | 11.608656451 | 28.188801774 | 31.370860375  |
| 6  | 10.410965780 | 27.585340761 | 37.148304574  |
| 1  | 10.518761543 | 26.785378863 | 36.415124966  |
| 1  | 11.087460170 | 27.331652909 | 37.972916087  |
| 6  | 8.958286770  | 27.581123791 | 37.18212678   |
| 1  | 8.708765986  | 26.599973547 | 38.104342074  |
| 1  | 8.821263811  | 28.337212501 | 38.462083663  |
| 1  | 8.245460253  | 27.800192601 | 36.880365947  |
| 1  | 11.956007207 | 29.800916999 | 38.695059077  |
| 1  | 12.013197394 | 28.744005515 | 38.979915178  |
| 1  | 12.960280096 | 30.203956797 | 38.831879411  |
| 6  | 10.992218168 | 30.522193904 | 39.679588816  |
| 1  | 11.336424899 | 30.405726751 | 40.702956019  |
| 1  | 10.936899170 | 31.592221517 | 39.444084375  |
| 1  | 9.978079895  | 30.116120584 | 39.593450409  |
| 6  | 14.463464550 | 34.647294914 | 35.745960933  |
| 1  | 14.769914763 | 35.699657437 | 35.744778182  |
| 1  | 14.727918881 | 34.258994665 | 36.705900001  |
| 1  | 15.287850593 | 33.892913404 | 34.675740795  |
| 1  | 16.361460276 | 33.992186312 | 34.8761749770 |
| 1  | 15.039958523 | 32.826055723 | 34.670597939  |
| 1  | 15.089140071 | 34.288189129 | 33.673216111  |
| 1  | 12.756517402 | 36.847902164 | 34.345114440  |
| 1  | 12.088738855 | 37.678724412 | 34.579584737  |
| 1  | 13.704960590 | 37.075846883 | 34.844895710  |
| 6  | 13.000396795 | 36.813103479 | 32.817494149  |

|   |              |              |              |
|---|--------------|--------------|--------------|
| 1 | 13.405690084 | 37.771341534 | 32.470637018 |
| 1 | 13.711383356 | 36.023214842 | 32.549199755 |
| 1 | 12.067647745 | 36.622224617 | 32.276057701 |
| 1 | 5.067580622  | 30.595672477 | 32.26466631  |
| 6 | 9.913405818  | 27.363858692 | 34.064412957 |
| 6 | 8.719344452  | 26.626432368 | 34.119859394 |
| 1 | 7.774760272  | 27.155918475 | 34.203853541 |
| 6 | 8.731646343  | 25.22623051  | 34.074139839 |
| 6 | 11.178426249 | 25.277151066 | 33.896323885 |
| 6 | 11.136334293 | 26.677828896 | 33.955459543 |
| 1 | 12.060312871 | 27.247575948 | 33.917508155 |
| 1 | 13.246999593 | 25.139922680 | 33.260108227 |
| 6 | 13.442976501 | 32.297420127 | 37.507982632 |
| 6 | 13.367956614 | 33.162583009 | 38.611115061 |
| 1 | 12.497623154 | 33.802858205 | 38.723045731 |
| 6 | 14.393528992 | 33.204930279 | 39.570827440 |
| 6 | 15.505136840 | 32.365463251 | 39.401710283 |
| 1 | 16.302758666 | 32.386757378 | 40.140956595 |
| 6 | 15.611190781 | 31.492922940 | 38.303241869 |
| 6 | 14.568526291 | 31.464619800 | 37.367193935 |
| 1 | 14.622365230 | 30.798472070 | 36.519520293 |
| 6 | 16.831112940 | 30.611371927 | 38.138688881 |
| 1 | 17.091047189 | 30.109423216 | 39.078488901 |
| 1 | 16.666558832 | 29.840590728 | 37.379535707 |
| 1 | 17.70905470  | 31.197054403 | 37.831810986 |
| 6 | 14.304309363 | 34.152430543 | 40.748711576 |
| 1 | 13.277515234 | 32.247784060 | 41.123413920 |
| 1 | 14.943522729 | 33.824683959 | 41.575139671 |
| 1 | 14.622573481 | 35.166062402 | 40.468816311 |
| 6 | 9.670030529  | 37.179671843 | 34.457201587 |
| 6 | 9.557178898  | 37.991854952 | 33.314646335 |
| 1 | 9.471970462  | 37.523609711 | 33.338830986 |
| 6 | 9.547894049  | 39.390751140 | 33.417345580 |
| 6 | 9.644387188  | 39.971081954 | 34.694128664 |
| 6 | 9.751466489  | 39.186709892 | 35.853848314 |
| 6 | 9.768756681  | 37.788694968 | 35.719820886 |
| 1 | 9.854378697  | 37.162864578 | 36.603146583 |
| 1 | 6.754807005  | 24.850041748 | 34.882296756 |
| 6 | 9.869534759  | 39.833137480 | 37.218222555 |
| 1 | 10.920449797 | 39.997050413 | 37.492383593 |
| 1 | 9.370596249  | 40.807834871 | 37.243252583 |
| 1 | 9.424957563  | 39.204466272 | 37.996790352 |
| 6 | 9.403947794  | 40.260055494 | 32.185704282 |
| 1 | 8.367000922  | 40.599426963 | 32.057556975 |
| 1 | 10.031641708 | 41.156082875 | 32.252067538 |
| 1 | 9.685365586  | 39.716446821 | 31.278233591 |
| 1 | 9.632277593  | 41.054836452 | 34.786360109 |

6<sub>1</sub>{B3LYP}optBS1

|    |              |              |              |
|----|--------------|--------------|--------------|
| 6  | 8.140485437  | 30.046498789 | 31.181135125 |
| 6  | 7.672996774  | 29.997124575 | 29.745667656 |
| 1  | 7.680631398  | 28.955801141 | 29.405759602 |
| 6  | 6.639807960  | 30.331383065 | 29.635666479 |
| 6  | 8.556174269  | 30.828977657 | 28.794660686 |
| 1  | 8.184374898  | 30.760146547 | 27.764743451 |
| 1  | 8.561025846  | 31.885604725 | 29.082823890 |
| 1  | 9.593811923  | 40.376634915 | 28.806227897 |
| 6  | 9.435974570  | 27.835140432 | 31.103940339 |
| 1  | 8.794952403  | 27.605463808 | 30.245790751 |
| 6  | 10.886575894 | 27.989502469 | 30.605237032 |
| 1  | 11.220428606 | 27.073238837 | 30.102790550 |
| 1  | 10.976491635 | 28.819467457 | 29.895392813 |
| 6  | 6.028909331  | 32.225426091 | 31.095611908 |
| 6  | 5.986953300  | 33.039803671 | 29.958446497 |
| 1  | 6.806510608  | 33.729897671 | 29.770140352 |
| 6  | 4.912944936  | 32.974265553 | 29.601299471 |
| 6  | 3.870497287  | 32.081731423 | 29.332340304 |
| 1  | 3.031328822  | 32.020689869 | 28.640379936 |
| 6  | 3.877314322  | 31.261578743 | 30.469401894 |
| 6  | 4.969781181  | 31.337405302 | 31.336664474 |
| 1  | 4.875967138  | 33.866206274 | 27.840375722 |
| 1  | 5.862817846  | 33.942779309 | 27.369707536 |
| 1  | 4.171851954  | 33.489893419 | 27.090811841 |
| 1  | 4.563401698  | 34.886166274 | 28.102356043 |
| 6  | 2.720645008  | 30.329347953 | 30.752447435 |
| 1  | 1.856440218  | 30.879093699 | 31.150011466 |
| 1  | 2.385638050  | 29.816393018 | 29.846645450 |
| 1  | 2.992474957  | 29.567439178 | 31.490445355 |
| 6  | 9.986096050  | 24.597715199 | 34.011359866 |
| 1  | 10.02020598  | 23.509716624 | 33.971140959 |
| 6  | 12.507732582 | 24.606515043 | 33.768901717 |
| 1  | 12.954752409 | 24.420856846 | 34.751295968 |
| 1  | 12.392262624 | 23.643168958 | 33.259173025 |
| 6  | 7.468171717  | 24.43824227  | 34.256466336 |
| 1  | 7.665321894  | 23.390224021 | 34.505127217 |
| 1  | 6.920112190  | 24.453857425 | 33.304847798 |
| 26 | 9.408819977  | 32.26040715  | 34.673439260 |
| 7  | 8.549079707  | 33.711571576 | 33.460239953 |
| 7  | 8.800636443  | 30.87675063  | 33.235795038 |
| 7  | 7.799793387  | 30.838182745 | 35.269447184 |
| 7  | 7.837280459  | 33.69061044  | 35.186523665 |
| 17 | 7.896393378  | 32.163729493 | 36.395509426 |
| 6  | 8.491562303  | 35.009332054 | 33.914589234 |
| 6  | 7.149295221  | 35.541211517 | 33.696936952 |
| 6  | 6.439133733  | 34.564565238 | 33.027061737 |
| 6  | 7.350991305  | 33.440965865 | 32.833816874 |
| 6  | 7.179829531  | 32.282092676 | 32.048152440 |
| 6  | 8.028295750  | 31.149057965 | 32.130153462 |
| 6  | 8.916254350  | 29.07793661  | 31.787602129 |
| 6  | 9.265036577  | 29.586067310 | 33.107748636 |
| 6  | 9.85         |              |              |

|   |              |              |              |   |               |              |              |    |              |              |               |
|---|--------------|--------------|--------------|---|---------------|--------------|--------------|----|--------------|--------------|---------------|
| 6 | 9.482439295  | 5.305603958  | 9.418841469  | 6 | 9.634569417   | 8.687481315  | 17.119511967 | 1  | 5.103055296  | 4.566074754  | 8.595268648   |
| 6 | 8.382756514  | 6.086707435  | 9.972093411  | 1 | 10.688527495  | 8.899848022  | 17.330777546 | 6  | 5.245453578  | 4.66296029   | 6.441335921   |
| 6 | 7.261330320  | 6.634118218  | 9.320581885  | 1 | 9.253643458   | 8.155186637  | 17.991969502 | 6  | 5.873770448  | 5.317939550  | 5.373030659   |
| 6 | 11.658774198 | 4.298090576  | 10.341403094 | 6 | 8.878332189   | 10.030308820 | 16.982617544 | 1  | 5.627842180  | 5.023793011  | 4.353136788   |
| 1 | 12.535094337 | 4.790575102  | 10.763171890 | 1 | 8.989125641   | 10.628155322 | 17.895301600 | 6  | 6.812068498  | 6.335869836  | 5.578051411   |
| 1 | 11.895767038 | 4.106433497  | 9.288882406  | 1 | 7.809104212   | 9.862755111  | 16.813867754 | 6  | 7.139829519  | 6.689482266  | 6.893399778   |
| 1 | 11.457710789 | 2.939177934  | 11.055709592 | 1 | 9.263565166   | 10.616446331 | 16.140439422 | 1  | 7.883677553  | 7.461906888  | 7.076155736   |
| 1 | 12.357261212 | 2.320341332  | 10.954130529 | 6 | 11.879789917  | 8.399651310  | 14.963104131 | 6  | 4.232488823  | 3.567999243  | 6.187630425   |
| 1 | 10.612432236 | 2.389018353  | 10.630135060 | 1 | 12.672745691  | 7.732897006  | 14.640305151 | 1  | 4.618970477  | 2.823577799  | 5.480330443   |
| 1 | 11.259825449 | 3.078956042  | 12.122995670 | 1 | 12.110674381  | 8.660511903  | 16.002110142 | 1  | 3.309627777  | 3.974464477  | 5.752332584   |
| 6 | 9.552002269  | 4.610362331  | 8.079990238  | 1 | 6.193730459   | 9.686591583  | 14.106853555 | 1  | 3.963093770  | 3.047926179  | 7.112176513   |
| 1 | 10.601379735 | 4.392565594  | 7.849740122  | 1 | 12.926012051  | 10.155041976 | 14.182610836 | 6  | 7.452080556  | 7.004802621  | 6.404870238   |
| 1 | 9.200402009  | 5.263236352  | 7.280566960  | 1 | 11.187732743  | 10.414515717 | 14.437596581 | 1  | 4.878226797  | 7.354034192  | 4.632571734   |
| 6 | 8.751845030  | 3.287039326  | 8.035024371  | 1 | 11.746354236  | 9.464829108  | 13.051324921 | 1  | 6.892677503  | 7.949978241  | 4.133658969   |
| 1 | 8.886210947  | 2.796326523  | 7.063567123  | 6 | 7.307667129   | 6.676600557  | 17.602186177 | 1  | 7.480985487  | 6.402475931  | 3.517770797   |
| 1 | 7.682286408  | 3.465812722  | 8.175591582  | 6 | 8.184128956   | 5.819562419  | 18.290876969 | 6  | 2.428067410  | 8.85531809   | 13.255611556  |
| 1 | 9.073733091  | 2.593073220  | 8.817541405  | 1 | 8.186167282   | 5.141203259  | 17.727365565 | 6  | 1.659026085  | 5.963024610  | 12.944362183  |
| 6 | 4.886946661  | 8.665924639  | 8.288836999  | 6 | 8.234165471   | 5.809333565  | 19.693034004 | 1  | 2.166896539  | 5.921125400  | 11.807367999  |
| 1 | 3.833313770  | 8.883841541  | 8.081911900  | 6 | 7.399593159   | 6.691342894  | 20.400967244 | 6  | 0.270435119  | 5.910465444  | 12.638134289  |
| 1 | 5.258903440  | 8.124532266  | 7.418007590  | 1 | 7.427546856   | 6.691065455  | 21.488394986 | 6  | -0.339650101 | 6.787457663  | 13.546333420  |
| 6 | 5.651842711  | 10.005042651 | 8.401799141  | 6 | 6.521179027   | 7.566277555  | 19.739421652 | 1  | -1.421109813 | 6.750204453  | 13.672576533  |
| 1 | 5.537734678  | 10.597191083 | 7.494817567  | 6 | 6.477496945   | 7.540713543  | 18.335248826 | 6  | 14.044533545 | 8.7872513750 | 11.147491970  |
| 6 | 6.721242832  | 9.832975662  | 8.572738366  | 1 | 5.790339313   | 8.194369520  | 17.806146465 | 6  | 12.656822636 | 7.803157726  | 11.314892927  |
| 1 | 5.275722019  | 10.599103014 | 2.515952925  | 6 | 9.170807965   | 4.871731217  | 20.425385133 | 1  | 12.010437177 | 8.472784660  | 10.751180467  |
| 6 | 2.641933460  | 8.388458745  | 10.447933562 | 1 | 8.664250576   | 4.374897002  | 21.261220299 | 6  | -0.554670493 | 4.934040736  | 11.829332864  |
| 1 | 1.849476537  | 7.713555154  | 10.77712317  | 1 | 10.029153924  | 5.414140036  | 20.843790439 | 1  | 0.063207895  | 4.113112546  | 11.063191324  |
| 1 | 2.410471064  | 8.645081041  | 9.408061948  | 1 | 9.560397923   | 4.097374327  | 19.757683552 | 1  | -1.028756137 | 5.429336589  | 10.970804562  |
| 6 | 2.584333686  | 9.679047335  | 11.298828775 | 6 | 5.654256804   | 6.526831277  | 20.525765756 | 1  | -1.358374173 | 4.494383105  | 12.431494781  |
| 1 | 1.595268704  | 10.146646660 | 11.22278023  | 1 | 4.771808053   | 8.828738998  | 19.953418506 | 6  | 14.661958235 | 8.899346874  | 10.224042678  |
| 1 | 3.333253580  | 10.405760757 | 10.659383651 | 1 | 6.206260518   | 9.441058943  | 20.789500117 | 1  | 15.626298148 | 8.557132571  | 9.832549549   |
| 1 | 2.767773567  | 9.462030204  | 12.355087982 | 1 | 5.312118222   | 8.078628631  | 21.465334741 | 1  | 14.840313233 | 9.849317384  | 10.746244155  |
| 6 | 7.211063471  | 6.653736329  | 7.823352414  | 6 | 12.121899566  | 6.163304624  | 12.813130462 | 1  | 14.007920281 | 9.115850297  | 9.371934355   |
| 6 | 6.337068098  | 5.786581225  | 7.143377274  | 1 | 12.635897594  | 5.229162079  | 13.731136406 | 8  | 9.455074583  | 8.830867547  | 10.444705388  |
| 1 | 5.710345963  | 5.108760046  | 7.713851343  | 1 | 11.949697711  | 4.652048154  | 14.341603657 | 6  | 10.195108280 | 2.696510022  | 14.540111028  |
| 6 | 6.282125372  | 5.766401947  | 5.742605450  | 6 | 14.016498950  | 5.010304328  | 13.845172697 | 6  | 9.827390065  | 1.544567755  | 8.823790065   |
| 6 | 7.108348582  | 6.658003245  | 5.026375818  | 6 | 14.883463687  | 7.599465280  | 13.029703311 | 1  | 8.909855596  | 1.552356525  | 13.241918705  |
| 1 | 7.075932837  | 6.644176233  | 3.933931384  | 1 | 15.956469006  | 5.598458708  | 13.107333782 | 6  | 10.629356692 | 4.07735002   | 13.689339328  |
| 6 | 7.982439897  | 7.535601658  | 5.08219326   | 6 | 0.123593656   | 6.691216453  | 13.306859463 | 1  | 10.330451253 | 4.077893050  | 13.324986632  |
| 6 | 8.032512659  | 7.518395729  | 7.678277749  | 6 | 1.511721820   | 6.883961738  | 13.414210227 | 6  | 11.805685035 | 0.393923421  | 11.4349035783 |
| 1 | 8.717214713  | 8.180585245  | 7.605601911  | 1 | 1.902717321   | 7.598171442  | 14.113309285 | 1  | 12.426393077 | 4.947795650  | 14.670588073  |
| 6 | 5.357934945  | 4.810554998  | 5.06647456   | 6 | 14.563314439  | 3.982380543  | 18.414085337 | 6  | 12.174116793 | 1.543240174  | 15.373208339  |
| 1 | 5.902703140  | 4.224256835  | 4.266346141  | 1 | 13.758737376  | 3.481329758  | 15.360413719 | 1  | 13.089017919 | 1.550518176  | 15.029168002  |
| 1 | 4.561259792  | 5.350161793  | 4.48793562   | 1 | 15.235444941  | 4.443590127  | 15.549232964 | 6  | 11.380747639 | 2.688982957  | 15.293672166  |
| 1 | 4.884439262  | 4.109796654  | 5.710595471  | 1 | 15.140278953  | 3.210255895  | 14.289629243 | 1  | 11.661404021 | 3.590138277  | 15.832841669  |
| 6 | 8.839701702  | 8.499717666  | 4.88627467   | 6 | -0.835834531  | 7.495134597  | 14.159656968 | 1  | 8.669766659  | 3.778108965  | 13.974886524  |
| 1 | 9.759528275  | 8.753208377  | 5.429212968  | 1 | -1.759895553  | 6.939572685  | 14.252289862 | 26 | 7.257273382  | 6.493172360  | 12.739750382  |
| 1 | 8.305244449  | 9.439858390  | 4.69069756   | 1 | -1.116921791  | 8.435403259  | 13.666293244 | 17 | 7.181558118  | 3.940481034  | 12.715811454  |
| 1 | 9.120032177  | 8.078020285  | 3.913806739  | 1 | -0.389640849  | 7.755747407  | 15.125423062 | 7  | 8.766898338  | 6.812480093  | 13.966623366  |
| 6 | 2.404224092  | 6.160711268  | 12.607607531 | 6 | 7.821767710   | 1.629311872  | 14.782507679 | 7  | 6.011142447  | 6.534477166  | 14.306350483  |
| 1 | 1.896440616  | 5.225464070  | 11.687301686 | 6 | 8.903283267   | 1.865344386  | 15.603754261 | 6  | 6.898871449  | 6.943918594  | 15.318100183  |
| 1 | 2.586729076  | 4.652733115  | 11.077233877 | 6 | 9.583896625   | 3.095501044  | 15.642719967 | 6  | 9.891919736  | 7.621366525  | 15.818936199  |
| 6 | 0.517078619  | 5.001702976  | 11.569639663 | 6 | 9.272022827   | 3.905486579  | 14.991034626 | 6  | 10.719277545 | 7.809173849  | 14.734903850  |
| 6 | -0.354471077 | 5.746990302  | 12.384005111 | 6 | 10.655575733  | 3.262976038  | 16.531688218 | 6  | 10.045464526 | 7.198924978  | 15.589188577  |
| 1 | -1.426696614 | 5.582374665  | 12.303011757 | 6 | 11.170045576  | 4.219520264  | 16.567906374 | 6  | 10.602549570 | 6.806870002  | 12.367509268  |
| 6 | 14.399511695 | 6.703076236  | 12.108793493 | 6 | 4.11060232149 | 2.217846514  | 17.373360329 | 6  | 4.6812035745 | 6.275475160  | 14.285236622  |
| 6 | 13.010421446 | 6.890626576  | 12.005305947 | 1 | 11.892293703  | 2.353157307  | 18.057235068 | 6  | 4.226075907  | 5.439164614  | 15.1093173828 |
| 1 | 12.615309298 | 7.603611735  | 11.287361915 | 6 | 10.378565261  | 0.991925882  | 17.313858190 | 6  | 5.322912050  | 5.239638440  | 16.284286340  |
| 6 | -0.024232858 | 3.972722253  | 10.598911124 | 1 | 10.684437283  | 0.172174771  | 17.961779001 | 6  | 6.414999714  | 6.002454479  | 15.523614672  |
| 1 | 0.781020365  | 3.493604059  | 10.034387090 | 6 | 9.306206350   | 0.813304840  | 16.442813496 | 6  | 6.165146220  | 6.333684736  | 16.079518915  |
| 1 | -0.717913927 | 4.427406748  | 9.880094670  | 1 | 8.765791884   | -0.124591286 | 16.387422001 | 6  | 2.889295259  | 4.761713608  | 15.487718254  |
| 1 | -0.576333323 | 3.183419790  | 11.124696168 | 1 | 7.621502599   | 2.379788188  | 17.110592609 | 1  | 2.068200472  | 5.417661639  | 15.201565726  |
| 6 | 15.353993441 | 7.510717239  | 11.254091449 | 6 | 7.570525427   | 6.853578759  | 11.518166835 | 1  | 2.751244729  | 4.561038561  | 16.565620850  |
| 1 | 16.279098537 | 6.958041597  | 11.058061507 | 6 | 8.499763535   | 6.537230509  | 11.719307801 | 6  | 3.4325290984 | 3.433281483  | 14.715312854  |
| 1 | 15.633930219 | 8.451262615  | 11.747568482 | 7 | 5.820116080   | 7.010885373  | 10.169340108 | 1  | 1.767939386  | 2.999476045  | 14.856751002  |
| 1 | 14.904300375 | 7.771051737  | 10.289895937 | 6 | 6.436676532   | 7.714057375  | 9.683252830  | 1  | 3.504851015  | 2.702778041  | 14.7384674836 |
| 8 | 6.602426843  | 1.577200648  | 10.455537874 | 6 | 3.810270784   | 7.886776827  | 10.717243873 | 1  | 2.922794379  | 3.580889017  | 13.642761218  |
| 6 | 5.512385000  | 1.826743431  | 9.648989654  | 6 | 3.477166148   | 7.248485217  | 11.903362559 | 6  | 5.382978350  | 4.249936235  | 17.247590174  |
| 6 | 4.830347346  | 3.056499392  | 9.641813085  | 6 | 3.913264561   | 6.826987749  | 13.113638350 | 1  | 4.362599250  | 4.015114950  | 17.570276788  |
| 1 | 5.149676057  | 3.852776758  | 10.665557514 | 6 | 6.477166148   | 7.248485217  | 11.903362559 | 1  | 5.886547084  | 6.069473377  | 18.119117455  |
| 6 | 3.748089283  | 3.239873244  | 8.769605236  | 6 | 3.913264561   | 6.826987749  | 13.113638350 | 6  | 6.082729527  | 2.935971318  | 16.845324330  |
| 1 | 3.232714577  | 4.196477006  | 8.785386136  | 6 | 9.830747880   | 6.281865028  | 11.283813298 | 6  | 16.26539257  | 2.247717933  | 17.169876352  |
| 6 | 3.335428261  | 2.210797040  | 7.912119824  | 6 | 10.288945322  | 5.491351060  | 10.441601060 | 1  | 7.111619255  | 3.119653165  | 16.507482627  |
| 1 | 2.495333466  | 2.358117055  | 7.240747660  | 6 | 9.191969426   | 5.312407053  | 9.3          |    |              |              |               |

|   |              |              |               |
|---|--------------|--------------|---------------|
| 1 | 12.461794761 | 5.283826416  | 13.591560813  |
| 6 | 14.300762174 | 6.033128985  | 12.743853266  |
| 4 | 14.847656095 | 6.977570210  | 11.865374624  |
| 1 | 15.928349478 | 7.013124487  | 11.732361490  |
| 6 | 0.401684007  | 7.00551512   | 14.305208077  |
| 6 | 1.794941460  | 7.715015790  | 14.159402301  |
| 2 | 2.394661055  | 8.392558606  | 14.763785730  |
| 6 | 15.185610005 | 5.045321241  | 13.470519247  |
| 1 | 14.768298475 | 4.775108580  | 14.464414620  |
| 1 | 16.192749633 | 5.446681717  | 13.627495563  |
| 1 | 15.288359414 | 4.115138902  | 12.896720920  |
| 6 | -0.282654835 | 8.651433709  | 15.261992966  |
| 1 | -1.251332606 | 8.259723794  | 15.590637799  |
| 1 | -0.466547715 | 9.627042017  | 14.791737703  |
| 1 | 0.329248232  | 8.832375067  | 11.5612866590 |
| 8 | 4.475027590  | 3.970543156  | 11.037282210  |
| 6 | 3.967676665  | 2.731557665  | 10.788327913  |
| 6 | 4.570458767  | 1.557152148  | 11.259250116  |
| 1 | 5.481074324  | 1.623881883  | 11.847860581  |
| 6 | 3.992445564  | 0.322083692  | 10.963650338  |
| 4 | 4.466476166  | -0.584962244 | 11.335478904  |
| 6 | 2.820725357  | 0.238817894  | 10.211051737  |
| 2 | 2.377184080  | -0.727705665 | 9.988013165   |
| 6 | 2.226544640  | 1.414039896  | 9.744004800   |
| 1 | 1.314475585  | 1.364503294  | 9.152680168   |
| 6 | 2.792127755  | 2.056290554  | 10.026945471  |
| 1 | 2.342666166  | 3.578228347  | 9.663704155   |
| 1 | 5.303178306  | 3.913288255  | 11.569121245  |

### $4_2\{B3LYP\}_{optBS1}$

|    |              |              |              |
|----|--------------|--------------|--------------|
| 7  | 5.904156535  | 6.649153561  | 11.333873619 |
| 7  | 8.641341637  | 6.297826929  | 11.315709397 |
| 6  | 6.165775532  | 7.050515739  | 10.020036647 |
| 6  | 5.024746250  | 7.805928197  | 9.524588265  |
| 4  | 4.027337867  | 7.721443145  | 10.490478016 |
| 6  | 4.561852351  | 6.933616573  | 11.590116426 |
| 6  | 3.875107856  | 6.358599810  | 12.681475544 |
| 6  | 9.956148064  | 5.892082598  | 11.575328616 |
| 10 | 10.452165228 | 5.137179390  | 10.433333091 |
| 6  | 9.488245951  | 5.224981734  | 9.435196191  |
| 6  | 8.386896347  | 6.012253669  | 9.971130211  |
| 6  | 7.278520672  | 6.563582763  | 9.304478177  |
| 11 | 11.685134036 | 4.268570682  | 10.369707446 |
| 1  | 12.548891338 | 4.775670235  | 10.799820434 |
| 1  | 11.936332302 | 4.078563534  | 9.319944017  |
| 1  | 11.494893492 | 2.909877435  | 11.087449486 |
| 1  | 12.404307225 | 2.303341905  | 10.999871735 |
| 1  | 10.662416972 | 2.345901370  | 10.624780734 |
| 1  | 11.280804706 | 3.051888402  | 12.151449780 |
| 6  | 9.542867187  | 4.490314338  | 8.117332866  |
| 10 | 10.584174706 | 4.223419855  | 7.903807200  |
| 1  | 9.222416678  | 5.133082118  | 7.295470725  |
| 6  | 8.689138250  | 3.199802129  | 8.106071191  |
| 1  | 8.812184232  | 2.673100978  | 7.152312408  |
| 1  | 7.626488113  | 3.426287666  | 8.230119809  |
| 1  | 8.976021515  | 2.519036981  | 8.913467036  |
| 6  | 4.960151125  | 8.660311309  | 8.282246612  |
| 1  | 3.913251124  | 8.902429132  | 8.067483298  |
| 1  | 5.329277248  | 8.116476890  | 7.411893521  |
| 6  | 5.753963370  | 9.980886700  | 8.420787135  |
| 1  | 5.658868745  | 10.582853740 | 7.509172228  |
| 1  | 6.818164438  | 9.782471553  | 8.587565528  |
| 1  | 5.386095467  | 10.576190514 | 9.264299814  |
| 6  | 2.707368831  | 8.452004549  | 10.442739371 |
| 1  | 1.892150343  | 7.805230395  | 10.769896938 |
| 1  | 2.482817087  | 8.718928002  | 9.835855467  |
| 6  | 2.698689689  | 9.741619409  | 11.227246600 |
| 1  | 1.727612606  | 10.245814898 | 11.291572222 |
| 1  | 3.474026881  | 10.441225419 | 10.964432984 |
| 1  | 2.882560980  | 9.513680280  | 12.352761280 |
| 6  | 7.255916609  | 6.597671005  | 7.807941038  |
| 6  | 6.359120722  | 5.780284022  | 7.808404727  |
| 1  | 5.691756998  | 5.122438529  | 7.645947143  |
| 6  | 6.330584944  | 5.784654478  | 5.695118158  |
| 6  | 7.212609199  | 6.636525628  | 5.008789962  |
| 1  | 7.202124183  | 6.645835598  | 3.920771100  |
| 8  | 8.114555081  | 7.470203809  | 5.691407336  |
| 6  | 8.131709207  | 7.434133003  | 7.095164449  |
| 1  | 8.833820077  | 8.057528603  | 7.641598814  |
| 6  | 5.362264765  | 4.898393351  | 4.939540228  |
| 1  | 5.847081538  | 4.416267879  | 4.082749224  |
| 1  | 4.516736640  | 5.479358509  | 5.547358888  |
| 1  | 4.954637299  | 4.114042030  | 5.584245951  |
| 6  | 9.035319453  | 8.397268067  | 4.925901894  |
| 1  | 9.884191388  | 8.714809782  | 5.540029322  |
| 1  | 8.506636090  | 9.303831241  | 4.601380465  |
| 1  | 9.430885706  | 7.913632954  | 4.025338576  |
| 6  | 2.384925447  | 6.233785860  | 12.607898614 |
| 6  | 1.805690449  | 5.343326464  | 11.685426057 |
| 1  | 2.448410374  | 4.745693980  | 11.047735987 |
| 6  | 0.413410199  | 5.195126502  | 11.600238796 |
| 6  | -0.397527092 | 5.969192650  | 12.445993115 |
| 1  | -1.478671700 | 5.862948934  | 12.392478469 |
| 14 | 16.367482253 | 6.868325193  | 11.99792171  |
| 6  | 12.968959533 | 6.985849472  | 11.930642227 |
| 12 | 15.19516377  | 7.667748401  | 11.214557908 |
| 6  | -0.204504305 | 4.207668390  | 10.632630562 |
| 1  | 0.550749838  | 3.770806603  | 9.972923111  |
| 1  | -0.968850700 | 4.684973245  | 10.006548937 |
| 1  | -0.693959622 | 3.382896573  | 11.167039639 |
| 6  | 15.257632034 | 7.1079592047 | 11.107047442 |
| 16 | 16.197732913 | 7.194605483  | 10.881388291 |
| 1  | 15.515038214 | 8.663460627  | 11.586851330 |
| 1  | 14.764449611 | 7.945628721  | 10.158159965 |
| 8  | 6.434341008  | 14.83210038  | 10.572801883 |

|    |              |              |              |
|----|--------------|--------------|--------------|
| 6  | 5.383720259  | 1.822025313  | 9.747118113  |
| 6  | 4.797835364  | 3.100853704  | 9.735363996  |
| 1  | 5.164718365  | 3.867719808  | 10.409911431 |
| 6  | 3.749541681  | 3.371194700  | 8.844020752  |
| 1  | 3.308971119  | 4.364572294  | 8.829630159  |
| 6  | 3.274464119  | 2.381593294  | 7.972658159  |
| 1  | 2.460792233  | 2.596586433  | 7.286961355  |
| 6  | 3.861978892  | 1.107029274  | 7.999799782  |
| 1  | 3.501307184  | 0.329568457  | 7.332729543  |
| 6  | 4.910159555  | 0.825529802  | 7.87691421   |
| 1  | 5.378226964  | -0.151454975 | 8.911728317  |
| 6  | 6.90723905   | 2.207449093  | 11.194997209 |
| 26 | 7.261340235  | 6.202144701  | 12.693895443 |
| 17 | 7.262031108  | 3.691013200  | 12.692214066 |
| 7  | 8.619690328  | 6.639125690  | 14.056657577 |
| 7  | 5.880902833  | 6.291790392  | 14.072026259 |
| 6  | 8.356674474  | 7.037745646  | 15.371451532 |
| 6  | 9.498055891  | 7.790819560  | 15.869777708 |
| 10 | 10.496983174 | 7.706474193  | 14.905340952 |
| 6  | 9.962652579  | 6.923209700  | 13.802057061 |
| 10 | 10.648226303 | 6.354245113  | 12.706536230 |
| 6  | 4.565223743  | 5.889698111  | 13.810952533 |
| 6  | 4.067773758  | 5.130392480  | 14.949582141 |
| 6  | 5.033451079  | 5.209839101  | 15.946878448 |
| 6  | 6.135053365  | 5.999587550  | 15.414871432 |
| 6  | 7.242403750  | 6.550414475  | 16.084627037 |
| 6  | 2.830434062  | 4.268048574  | 15.012963740 |
| 1  | 1.972034364  | 4.776088953  | 14.573637228 |
| 1  | 2.571678103  | 4.088356189  | 16.062831163 |
| 6  | 3.017656940  | 2.902709699  | 14.307317414 |
| 2  | 2.103919209  | 2.302381559  | 14.393069050 |
| 1  | 3.843353094  | 2.336979979  | 14.750523928 |
| 1  | 3.240215375  | 3.035382982  | 13.243785527 |
| 6  | 4.980303796  | 4.465082469  | 17.258939563 |
| 1  | 3.940946252  | 4.185425191  | 17.465444551 |
| 1  | 5.289567547  | 5.105893688  | 18.086313730 |
| 6  | 5.848246459  | 3.184062272  | 17.266808171 |
| 1  | 5.273803264  | 2.649108433  | 18.215802436 |
| 6  | 6.909295424  | 3.426394843  | 17.152674082 |
| 1  | 5.575408035  | 2.505983995  | 16.452055156 |
| 6  | 9.560555261  | 8.644155190  | 17.113195889 |
| 1  | 10.606404676 | 8.891224932  | 17.327114804 |
| 1  | 9.194680089  | 8.097659240  | 17.983490168 |
| 6  | 8.760085282  | 9.960735719  | 16.977213672 |
| 1  | 8.851934489  | 10.561112116 | 17.890176862 |
| 1  | 7.697053190  | 9.756964466  | 16.810222863 |
| 1  | 9.124733920  | 10.595535001 | 16.134944617 |
| 1  | 11.818846725 | 8.432973708  | 14.958868817 |
| 1  | 12.613752553 | 7.787269665  | 14.623826219 |
| 1  | 12.045318327 | 6.888824614  | 16.000186208 |
| 1  | 11.830390974 | 9.730890366  | 16.117216639 |
| 1  | 12.803083208 | 10.231307841 | 14.195911762 |
| 1  | 11.057696301 | 10.429558992 | 14.457862315 |
| 1  | 11.644365888 | 9.513766519  | 13.059890425 |
| 6  | 7.254446766  | 6.589547688  | 17.581275042 |
| 6  | 8.148929114  | 5.780100237  | 18.302952582 |
| 1  | 8.825039125  | 5.123373242  | 17.764815636 |
| 6  | 8.163209381  | 5.790634414  | 19.706620976 |
| 6  | 7.269674720  | 6.639909398  | 20.380746125 |
| 1  | 7.269092604  | 6.653351345  | 21.468663213 |
| 6  | 6.369686468  | 7.465719868  | 19.680666437 |
| 6  | 6.366751552  | 7.423924515  | 18.282523427 |
| 1  | 5.666312878  | 8.041074540  | 17.726873785 |
| 6  | 9.129059181  | 4.914072273  | 20.475941112 |
| 1  | 8.642181932  | 4.445238851  | 21.338873185 |
| 1  | 9.975564452  | 5.499096665  | 20.861212060 |
| 1  | 9.536085522  | 4.120480487  | 19.842751772 |
| 6  | 5.435629884  | 8.389768806  | 20.439074108 |
| 1  | 4.594580984  | 8.705152808  | 19.813359571 |
| 1  | 5.957024887  | 9.297697034  | 20.771709926 |
| 1  | 5.028740200  | 7.904484755  | 21.333690687 |
| 6  | 12.139195013 | 6.229125405  | 12.779075993 |
| 6  | 12.722283161 | 5.335595358  | 13.690175735 |
| 1  | 12.082436066 | 4.735795949  | 14.328768382 |
| 6  | 14.114820628 | 5.187146507  | 13.768342392 |
| 6  | 14.921717581 | 5.965187200  | 12.919200295 |
| 1  | 16.003061791 | 5.859289031  | 12.971656812 |
| 6  | 0.152657881  | 6.868537936  | 13.377415197 |
| 6  | 1.550964800  | 6.986453679  | 13.450793796 |
| 1  | 1.996967853  | 7.665149071  | 14.172306809 |
| 6  | 14.736916992 | 4.193078001  | 14.726180099 |
| 1  | 13.993353662 | 3.787981565  | 15.418819617 |
| 1  | 15.538537734 | 4.653308162  | 15.316442742 |
| 1  | 15.179274689 | 3.346013135  | 14.185294750 |
| 6  | -0.741438090 | 7.704740657  | 14.269104423 |
| 1  | -1.676394041 | 7.182726970  | 14.499417536 |
| 1  | -1.008411907 | 8.655046188  | 13.787767838 |
| 1  | -0.247158771 | 7.947306484  | 15.215644883 |
| 8  | 8.082516807  | 1.491040834  | 14.822981916 |
| 6  | 9.128151884  | 1.831159895  | 15.653512651 |
| 6  | 9.722427681  | 3.106214210  | 15.657099033 |
| 1  | 9.365331810  | 3.868848674  | 14.972621652 |
| 6  | 10.765373831 | 3.378727942  | 16.553758513 |
| 1  | 11.212270347 | 4.569310855  | 16.561380366 |
| 1  | 11.226681364 | 2.395006810  | 17.439055119 |
| 1  | 12.036073496 | 2.611630310  | 18.192110307 |
| 6  | 10.630824848 | 1.124140157  | 17.420294997 |
| 1  | 10.980546378 | 0.351319484  | 18.098524951 |
| 6  | 9.588045826  | 0.840420962  | 16.536768714 |
| 1  | 9.113367744  | -0.133662205 | 16.509422889 |
| 1  | 7.830838     |              |              |

|    |              |              |              |    |              |              |              |   |              |              |              |
|----|--------------|--------------|--------------|----|--------------|--------------|--------------|---|--------------|--------------|--------------|
| 6  | 5.571312033  | 4.33654197   | 17.381513818 | 1  | 2.534663907  | 8.762921785  | 9.270146060  | 1 | 9.652791256  | 3.799927214  | 19.570767360 |
| 1  | 4.562015744  | 4.117958473  | 17.748631527 | 6  | 2.787583826  | 9.842271233  | 11.126571923 | 6 | 5.611406726  | 8.050276904  | 20.65698142  |
| 6  | 6.079190315  | 4.855678572  | 18.192055502 | 1  | 1.839093315  | 10.383957779 | 11.027866858 | 1 | 4.751443502  | 8.424409389  | 20.092110584 |
| 6  | 6.293440492  | 2.995634834  | 17.119085691 | 1  | 3.593444028  | 10.495706887 | 10.773396215 | 1 | 6.170575739  | 8.922975823  | 21.021159840 |
| 1  | 6.332599118  | 2.399607855  | 18.039288088 | 1  | 2.957554944  | 9.645399603  | 12.190539661 | 1 | 5.232865251  | 7.518074565  | 21.536956559 |
| 1  | 7.320073688  | 3.154614065  | 16.775513383 | 6  | 7.249251762  | 6.425483094  | 7.792884717  | 6 | 12.170326860 | 6.449436306  | 12.795063761 |
| 1  | 5.776715299  | 2.407088956  | 16.353526015 | 6  | 6.355618434  | 5.540796417  | 7.149303964  | 6 | 12.783170392 | 5.543971115  | 13.680118801 |
| 6  | 10.174456074 | 8.380251422  | 17.012502429 | 1  | 5.713549754  | 4.911167051  | 7.565804488  | 1 | 12.162513317 | 4.897097809  | 14.291458571 |
| 1  | 11.244364421 | 8.596390506  | 17.102204810 | 6  | 6.298531007  | 5.442277659  | 5.970773303  | 6 | 14.179157275 | 5.444753038  | 13.763891291 |
| 1  | 9.937427140  | 7.700578063  | 17.831006776 | 6  | 7.144867507  | 6.263292139  | 4.985123059  | 6 | 14.961135684 | 6.284465092  | 12.950249042 |
| 6  | 9.387438857  | 9.691981501  | 17.202019460 | 1  | 7.110107489  | 6.195943586  | 3.899147738  | 1 | 16.045442026 | 6.217585344  | 13.006144568 |
| 1  | 9.612239745  | 10.139596986 | 18.178006613 | 6  | 8.041602295  | 7.162549909  | 5.586570190  | 6 | 0.125716075  | 7.152835062  | 13.285548693 |
| 1  | 8.307429160  | 9.514324710  | 17.151838270 | 6  | 8.091121488  | 7.226606827  | 6.989134160  | 6 | 1.525669472  | 7.236618749  | 13.378290696 |
| 1  | 9.641710830  | 10.422954022 | 16.425474869 | 1  | 8.788955103  | 7.903873906  | 7.473210218  | 1 | 1.978663038  | 7.930610752  | 14.086485777 |
| 6  | 12.012684485 | 8.646508897  | 14.508752623 | 6  | 5.344763000  | 4.474812173  | 5.080610289  | 6 | 14.832122225 | 4.444963946  | 14.695024375 |
| 1  | 12.814849041 | 8.082893695  | 14.031942483 | 1  | 5.866729171  | 3.841185628  | 4.353637004  | 1 | 14.087428355 | 3.917206628  | 15.298684057 |
| 1  | 12.353403027 | 8.851798077  | 15.528899249 | 1  | 4.555245865  | 5.007943449  | 4.535150106  | 1 | 15.537044025 | 4.935245298  | 15.278223840 |
| 6  | 11.832549115 | 9.987199692  | 13.769763016 | 1  | 4.861682831  | 3.819882623  | 4.511531755  | 1 | 15.398324410 | 3.690816324  | 14.133270955 |
| 1  | 12.771275215 | 10.553811577 | 13.766377584 | 6  | 8.921934718  | 8.055175481  | 4.736737101  | 6 | -0.759054612 | 8.046500425  | 14.129713476 |
| 1  | 11.063717015 | 10.604317637 | 14.249173798 | 1  | 9.786004476  | 8.419871836  | 5.301542373  | 6 | -1.717671975 | 7.505661656  | 14.351108232 |
| 1  | 11.531022579 | 9.826418913  | 12.729264980 | 1  | 8.368744552  | 8.934137757  | 4.379771804  | 1 | -0.979352116 | 8.991146327  | 13.614580361 |
| 6  | 8.017923008  | 6.216977093  | 17.496967049 | 1  | 9.294664235  | 7.524561181  | 3.853108147  | 1 | -0.279385957 | 8.299553544  | 15.081147171 |
| 6  | 8.970845064  | 5.260813768  | 17.874623819 | 6  | 2.351151735  | 6.430311735  | 12.578763265 | 8 | 8.126065262  | 1.464692163  | 14.805732050 |
| 1  | 9.486016993  | 6.948697499  | 17.101662867 | 6  | 1.761729233  | 5.520706073  | 13.681194276 | 6 | 0.125716075  | 7.854735555  | 15.592900943 |
| 6  | 9.252626359  | 5.017043004  | 19.223679341 | 1  | 2.398531400  | 4.883253275  | 11.077072167 | 6 | 9.813664813  | 3.056470961  | 15.590809713 |
| 6  | 8.569699090  | 5.762845833  | 20.192497310 | 6  | 0.368262502  | 5.404549840  | 11.579061136 | 1 | 9.432838812  | 3.834264446  | 14.936776868 |
| 1  | 8.776417213  | 5.578855973  | 21.246569813 | 6  | -0.434342002 | 6.232030962  | 12.385245269 | 6 | 10.898703666 | 3.307335699  | 16.442692762 |
| 6  | 7.623355734  | 6.735506313  | 19.844929950 | 1  | -1.516929654 | 6.131614704  | 12.316141704 | 1 | 11.348921264 | 4.296320460  | 16.450436189 |
| 6  | 7.350795120  | 6.947771863  | 18.488729310 | 6  | 14.377750083 | 7.200311780  | 12.060128311 | 6 | 11.393681270 | 2.305298652  | 17.288270319 |
| 1  | 6.603926082  | 7.682915106  | 18.196037274 | 6  | 12.975770441 | 7.267243016  | 11.986526726 | 1 | 12.235340202 | 2.505144790  | 17.943939989 |
| 6  | 10.277710174 | 3.979870641  | 19.625862683 | 1  | 12.505092152 | 7.957723242  | 11.292595775 | 6 | 10.789399434 | 1.038152774  | 17.275145431 |
| 1  | 9.909481782  | 3.350765584  | 20.445250156 | 6  | -0.260949853 | 4.402503551  | 10.633491540 | 1 | 11.165227905 | 0.251460044  | 17.922787394 |
| 1  | 11.204440818 | 4.453976509  | 19.976306647 | 1  | 0.499820582  | 3.846058053  | 10.077771716 | 6 | 9.705031314  | 0.776292817  | 16.464116351 |
| 1  | 10.536290380 | 3.326678451  | 18.786423949 | 1  | -0.917406236 | 4.896767932  | 9.905960840  | 1 | 9.223023243  | -0.194232075 | 16.413037400 |
| 6  | 6.919794462  | 7.539830826  | 20.915098187 | 1  | -0.873967117 | 3.673522100  | 11.178429815 | 1 | 7.857240843  | 2.327271555  | 14.196438236 |
| 1  | 6.027505261  | 8.037234126  | 20.520955005 | 6  | 15.240067509 | 8.108203654  | 11.208088891 |   |              |              |              |
| 1  | 7.577650294  | 8.317978292  | 21.32846093  | 1  | 16.201359072 | 7.639302856  | 10.917772351 |   |              |              |              |
| 1  | 6.610772962  | 6.906229108  | 21.754817526 | 1  | 15.455838306 | 9.053247151  | 11.724788784 |   |              |              |              |
| 6  | 12.094994944 | 6.685259466  | 12.113910757 | 1  | 14.744427191 | 8.359636005  | 10.264297250 |   |              |              |              |
| 12 | 8.432463637  | 5.783236463  | 12.880586613 | 8  | 6.343509548  | 1.433503550  | 10.658226674 |   |              |              |              |
| 1  | 12.319782417 | 5.119978381  | 13.464188911 | 6  | 5.275064623  | 1.766794727  | 9.847363294  |   |              |              |              |
| 6  | 14.234769540 | 5.715454016  | 12.753886939 | 6  | 4.711526296  | 3.054495989  | 9.811824201  |   |              |              |              |
| 6  | 14.867435389 | 6.587016815  | 11.858406336 | 1  | 5.109063423  | 3.837099891  | 10.449946559 |   |              |              |              |
| 1  | 15.951297191 | 6.546668717  | 11.756170305 | 6  | 3.641973894  | 3.315611606  | 8.943389808  |   |              |              |              |
| 6  | 0.277642103  | 7.070222130  | 14.211358879 | 1  | 3.220814036  | 4.316682764  | 8.907470451  |   |              |              |              |
| 6  | 1.669996519  | 7.207563145  | 14.123440411 | 6  | 3.124786261  | 2.307540740  | 8.118647597  |   |              |              |              |
| 1  | 2.180993254  | 7.935131196  | 14.751818088 | 6  | 2.295351520  | 2.515616247  | 7.450085309  |   |              |              |              |
| 15 | 0.528857777  | 4.699254540  | 13.544140057 | 6  | 3.690889422  | 1.023799924  | 8.169567450  |   |              |              |              |
| 1  | 14.625740646 | 4.574801391  | 13.554487083 | 3  | 3.297425901  | 0.232285204  | 7.658554610  |   |              |              |              |
| 1  | 16.081442708 | 4.989323210  | 13.630854905 | 6  | 4.759460680  | 0.751466742  | 9.025259765  |   |              |              |              |
| 1  | 14.968709133 | 3.712467491  | 13.063287606 | 1  | 5.211977195  | -0.232046068 | 9.02726107   |   |              |              |              |
| 6  | -0.525406442 | 7.956400875  | 15.138042571 | 1  | 6.631826503  | 2.170046371  | 11.243244592 |   |              |              |              |
| 1  | -1.492820147 | 7.506180034  | 15.384815222 | 26 | 7.260774792  | 6.107134122  | 12.696348290 |   |              |              |              |
| 1  | -0.726295277 | 8.934064215  | 14.679053095 | 17 | 7.268386316  | 3.668962819  | 12.698234426 |   |              |              |              |
| 1  | 0.009323399  | 8.145091928  | 16.070666392 | 7  | 6.640347847  | 6.665000254  | 14.102334517 |   |              |              |              |
| 8  | 5.031101845  | 3.841699187  | 10.434441392 | 7  | 5.805261113  | 6.397445490  | 15.12399175  |   |              |              |              |
| 6  | 4.341458064  | 2.670776229  | 10.75254476  | 6  | 8.365173197  | 6.988406882  | 14.433095742 |   |              |              |              |
| 6  | 4.692342386  | 1.538482941  | 11.115562737 | 6  | 9.499927096  | 7.728475523  | 15.973006273 |   |              |              |              |
| 1  | 5.547257604  | 1.583580602  | 11.547871326 | 6  | 10.490244845 | 7.736256456  | 14.996469405 |   |              |              |              |
| 6  | 3.939246303  | 0.370740351  | 10.992735712 | 6  | 9.970674062  | 7.000045789  | 13.848569833 |   |              |              |              |
| 1  | 4.217738971  | -0.502790144 | 11.078934249 | 6  | 10.675747725 | 6.514933226  | 12.717460802 |   |              |              |              |
| 6  | 2.841479877  | 0.312598990  | 10.132023024 | 6  | 4.484390632  | 6.052944113  | 13.844299669 |   |              |              |              |
| 1  | 2.260904588  | -0.601736548 | 10.041591194 | 6  | 3.945933288  | 5.295317122  | 14.374988245 |   |              |              |              |
| 6  | 2.498729004  | 1.444772850  | 9.388067423  | 6  | 4.925375808  | 5.280194939  | 15.960381701 |   |              |              |              |
| 1  | 1.646614792  | 1.414030358  | 8.712164216  | 6  | 6.065412803  | 6.038484529  | 15.446369014 |   |              |              |              |
| 3  | 2.328631519  | 2.620884080  | 9.502244812  | 6  | 7.224738371  | 6.492944101  | 16.113896204 |   |              |              |              |
| 1  | 2.976198808  | 3.509565755  | 8.934542411  | 6  | 2.653911710  | 4.515283830  | 15.037118592 |   |              |              |              |
| 1  | 5.755058402  | 3.794346869  | 11.100745960 | 1  | 1.829713013  | 5.082902570  | 14.604628240 |   |              |              |              |

**6<sub>2</sub>{B3LYP}<sub>optBS1</sub>**

|   |              |             |              |   |             |             |              |   |              |             |              |
|---|--------------|-------------|--------------|---|-------------|-------------|--------------|---|--------------|-------------|--------------|
| 7 | 5.882052255  | 6.664799118 | 11.288647352 | 1 | 2.387463076 | 4.350081797 | 16.087662867 | 1 | 9.652791256  | 3.799927214 | 19.570767360 |
| 7 | 8.714570642  | 6.399877826 | 11.265274794 | 1 | 2.741548927 | 3.141676570 | 14.328876857 | 1 | 5.611406726  | 8.050276904 | 20.65698142  |
| 6 | 6.157767857  | 6.992642325 | 9.960518393  | 1 | 1.785539882 | 2.610572000 | 14.408952272 | 1 | 4.751443502  | 8.424409389 | 20.092110584 |
| 6 | 5.024732491  | 7.73401329  | 9.422313828  | 1 | 3.159946628 | 2.514452708 | 14.775216699 | 1 | 6.170575739  | 8.922975823 | 21.021159840 |
| 6 | 4.034318883  | 7.742523421 | 10.398876407 | 1 | 2.976966492 | 3.258973805 | 13.266341229 | 1 | 5.232865251  | 7.518074565 | 21.536956559 |
| 6 | 4.552783911  | 7.000898356 | 11.543180627 | 1 | 3.807078913 | 4.223083417 | 14.440203066 | 1 | 12.170326860 | 6.449436306 | 12.795063761 |
| 3 | 8.844868638  | 6.510725824 | 12.671661409 | 1 | 5.210150732 | 5.038622442 | 18.086958723 | 1 | 12.783170392 | 5.543971115 | 13.680118801 |
| 6 | 10.034287434 | 6.053495065 | 11.546361447 | 6 | 5.658328666 | 3.144382698 | 17.143724370 | 1 | 12.162513317 | 4.897097809 | 14.291458571 |
| 6 | 10.570943175 | 5.291259434 | 10.419236113 | 1 | 5.540728217 | 2.568131574 | 18.069179437 | 6 | 14.179157275 | 5.444753038 | 13.763891291 |
| 6 | 9.590129097  | 5.273856229 | 9.434027027  | 1 | 6.725559922 | 3.336399964 | 17.002022124 | 6 | 14.961135684 | 6.284465092 | 12.950249042 |
| 6 | 8.453413300  | 6.037713433 | 9.945115559  | 1 | 5.322094289 | 2.522742107 | 16.307948840 | 6 | 16.045442026 | 6.217585344 | 13.006144568 |
| 6 | 7.296525967  | 6.495995136 | 9.275986856  | 1 | 9.195691145 | 7.889707607 | 18.101745050 | 6 | 0.125716075  | 7.152835062 | 13.285548693 |
| 1 |              |             |              |   |             |             |              |   |              |             |              |



|   |              |              |              |
|---|--------------|--------------|--------------|
| 1 | 8.535891649  | 14.607617759 | 20.662705917 |
| 1 | 8.376328669  | 13.837181337 | 22.216314407 |
| 6 | 7.078947610  | 11.522660724 | 22.860834652 |
| 1 | 7.718474244  | 12.313107414 | 23.267055172 |
| 1 | 6.201155437  | 11.479232203 | 23.506545836 |
| 6 | 7.838523374  | 10.182155955 | 22.949937779 |
| 1 | 8.145280446  | 9.988546231  | 23.985149489 |
| 1 | 7.209832255  | 9.348972355  | 22.620328687 |
| 1 | 8.734392646  | 10.191748386 | 22.319323769 |
| 6 | 1.46042713   | 9.611245568  | 21.315164408 |
| 1 | 0.698246620  | 8.824777882  | 21.345262262 |
| 1 | 1.948638977  | 9.589810390  | 22.288432478 |
| 6 | 0.758302070  | 10.970655540 | 21.133677659 |
| 1 | 0.051108651  | 11.150787778 | 21.952270018 |
| 1 | 1.484131274  | 11.790729150 | 21.127888564 |
| 1 | 0.203007304  | 11.008799754 | 20.189482273 |
| 6 | 0.797948364  | 7.934273613  | 18.783551772 |
| 1 | 0.879879609  | 6.896780314  | 18.456736879 |
| 1 | 0.197726475  | 7.914443851  | 19.689999471 |
| 6 | 0.031989552  | 8.738759418  | 17.174674607 |
| 1 | -0.953251055 | 8.292700662  | 17.530555757 |
| 1 | -0.117973279 | 9.777360967  | 18.031857148 |
| 1 | 0.577934575  | 8.765700055  | 16.765465422 |
| 6 | 5.203921362  | 5.412196053  | 15.361325936 |
| 1 | 1.450335544  | 5.166495091  | 15.476734982 |
| 1 | 5.467850716  | 5.109991869  | 14.340675116 |
| 6 | 0.029217383  | 4.567886477  | 13.572887255 |
| 1 | 5.813777660  | 3.510049109  | 16.215686361 |
| 1 | 7.104463273  | 4.717738250  | 16.207657827 |
| 1 | 5.795857872  | 4.829026606  | 17.390040942 |
| 6 | 7.494284129  | 6.928756261  | 13.980813746 |
| 1 | 7.153445250  | 5.925766030  | 13.703309272 |
| 1 | 7.652188803  | 7.463781040  | 13.043235990 |
| 6 | 8.844956039  | 6.800903163  | 14.715954507 |
| 1 | 9.575131051  | 6.285052383  | 14.080147503 |
| 1 | 9.253631544  | 7.782323605  | 14.973846418 |
| 1 | 8.738256530  | 6.235772652  | 15.646614649 |
| 6 | 7.084884141  | 12.979097510 | 13.106970237 |
| 1 | 7.523999255  | 13.971217911 | 12.957256732 |
| 1 | 7.731651475  | 12.284074631 | 12.572096897 |
| 6 | 5.683138498  | 12.961221786 | 12.466818362 |
| 1 | 5.744510074  | 13.195896774 | 11.397029668 |
| 1 | 5.212175706  | 11.977670118 | 12.571146617 |
| 1 | 5.022331849  | 13.697651801 | 12.938624996 |
| 6 | 7.118126444  | 15.113648317 | 15.369827949 |
| 1 | 7.833625950  | 15.604703137 | 16.029939742 |
| 1 | 7.460593595  | 15.317454460 | 14.350005817 |
| 6 | 5.732755532  | 15.761729642 | 15.560286023 |
| 1 | 5.782715414  | 16.840151247 | 15.369387200 |
| 1 | 4.993697564  | 15.327018583 | 14.874326991 |
| 1 | 5.367053106  | 15.618339188 | 16.582767531 |
| 4 | 4.223274349  | 10.451661957 | 22.394572232 |
| 6 | 3.728666569  | 11.588372822 | 23.049112812 |
| 1 | 3.622278229  | 12.518523323 | 22.494573296 |
| 6 | 3.374686818  | 11.542806293 | 24.401485718 |
| 4 | 4.046822620  | 9.191544455  | 24.472145468 |
| 4 | 4.377307620  | 9.259456607  | 23.112820033 |
| 1 | 4.775887786  | 8.386063862  | 22.601265114 |
| 6 | 2.849066588  | 6.424952401  | 17.064148981 |
| 6 | 2.998635233  | 5.416263819  | 18.004367953 |
| 1 | 3.709500160  | 5.594080062  | 18.858080166 |
| 6 | 2.265407577  | 4.229715193  | 17.968579597 |
| 6 | 1.357230445  | 4.074419288  | 16.910323500 |
| 1 | 0.772247302  | 3.157510374  | 16.845473663 |
| 6 | 1.185021935  | 5.060939742  | 15.934907997 |
| 6 | 1.946774555  | 6.235495718  | 16.026313227 |
| 1 | 1.833447299  | 7.012428266  | 15.273111577 |
| 6 | 7.702455765  | 9.966333367  | 13.382143104 |
| 6 | 7.097859321  | 9.673662228  | 12.156286883 |
| 1 | 6.021684055  | 9.517974685  | 12.115943810 |
| 6 | 7.859043423  | 9.583120951  | 10.981634519 |
| 6 | 9.241121251  | 9.777105653  | 11.065329036 |
| 1 | 9.841385532  | 9.702383133  | 10.159323899 |
| 6 | 9.877590348  | 10.063683763 | 12.283042558 |
| 6 | 9.092492227  | 10.164513660 | 13.433507565 |
| 1 | 9.560223951  | 10.383911542 | 14.389520922 |
| 6 | 7.984224483  | 14.643567339 | 18.28354914  |
| 6 | 9.334500205  | 14.649491214 | 17.910458167 |
| 1 | 9.815886693  | 13.796022158 | 17.535370999 |
| 6 | 9.427022741  | 17.020622587 | 18.510309921 |
| 6 | 8.079616501  | 17.00782495  | 18.910075914 |
| 6 | 7.367750801  | 15.800426282 | 18.770677700 |
| 1 | 6.321123065  | 15.763710406 | 19.070215768 |
| 4 | 4.229951139  | 7.034638318  | 24.598526564 |
| 6 | 2.437469900  | 3.138198333  | 19.002180372 |
| 2 | 6.895859663  | 2.180207213  | 18.529449627 |
| 1 | 3.232085379  | 3.380280097  | 17.14809284  |
| 1 | 1.511352187  | 2.980191959  | 19.570879969 |
| 6 | 0.215777767  | 4.863107987  | 14.790840333 |
| 1 | -0.474065896 | 4.036249775  | 14.989065825 |
| 1 | -0.380889951 | 5.765004398  | 14.610889678 |
| 1 | 0.744865080  | 4.634940840  | 13.856056142 |
| 6 | 7.191070479  | 9.282472768  | 6.657596209  |
| 1 | 7.923781433  | 9.207107025  | 8.847498774  |
| 1 | 6.635206140  | 8.337039713  | 9.694494373  |
| 1 | 6.472224470  | 10.066106257 | 9.385324865  |
| 1 | 11.376605970 | 10.259358855 | 12.341030035 |
| 1 | 11.693483258 | 11.104059530 | 11.715508734 |
| 1 | 11.715889598 | 10.451075173 | 13.363772126 |
| 1 | 11.907442086 | 9.371774078  | 11.477008827 |
| 6 | 7.418475241  | 18.244776916 | 19.44623978  |
| 1 | 7.698195936  | 19.135784968 | 18.867783696 |
| 1 | 6.327206897  | 18.160008497 | 19.423380416 |
| 1 | 7.717551531  | 18.425038065 | 20.482929460 |
| 1 | 10.239614943 | 9.471294791  | 19.700299924 |
| 1 | 9.263311738  | 9.288267165  | 19.455138800 |

**44[B3LYP]<sub>optB51</sub>**

|    |              |              |              |
|----|--------------|--------------|--------------|
| 26 | 5.532763739  | 10.203700677 | 17.922876271 |
| 17 | 7.323085749  | 8.749069527  | 18.810933863 |
| 6  | 5.714689799  | 11.490478081 | 19.391770231 |
| 7  | 8.52426017   | 9.555802810  | 18.746802559 |
| 6  | 5.203868934  | 9.021857087  | 16.395648133 |
| 6  | 6.597398646  | 11.397368374 | 16.759223704 |
| 6  | 6.835158609  | 12.314136835 | 19.515119042 |
| 6  | 7.197529673  | 12.391341688 | 20.924907258 |
| 6  | 6.223974111  | 11.701401695 | 21.636622477 |
| 6  | 5.248059965  | 11.221591090 | 20.670121356 |
| 6  | 3.948409940  | 10.734089091 | 20.890186048 |
| 6  | 3.216516368  | 10.118071751 | 19.855843882 |
| 6  | 1.804654285  | 9.764208519  | 18.824144951 |
| 6  | 1.633278865  | 8.872805658  | 18.770487654 |
| 6  | 2.937204674  | 6.686729080  | 15.815285866 |
| 6  | 3.346778893  | 7.681530586  | 17.251669738 |
| 6  | 4.556839350  | 7.788798961  | 16.546012127 |
| 6  | 5.257172423  | 6.787934018  | 15.752868239 |
| 6  | 6.237970740  | 7.450267040  | 15.027566577 |
| 6  | 6.150874353  | 8.863158952  | 15.378288961 |
| 6  | 6.759906411  | 9.972793425  | 14.764133998 |
| 6  | 6.777493442  | 11.240882957 | 15.383350043 |
| 6  | 7.163642740  | 12.522369335 | 14.809314124 |
| 6  | 7.335329731  | 13.409656339 | 15.865664790 |
| 6  | 7.053299118  | 12.676436574 | 17.093214292 |
| 6  | 7.348046088  | 13.039855635 | 18.424021724 |
| 6  | 8.457357535  | 12.961137354 | 21.530745645 |
| 1  | 8.723100503  | 13.907637685 | 21.061866070 |
| 1  | 8.274000283  | 13.189488539 | 22.587553389 |
| 6  | 6.294772522  | 11.379967480 | 23.110644009 |
| 1  | 7.022124856  | 12.047424830 | 23.586235134 |
| 1  | 5.340848403  | 11.570210360 | 23.606215436 |
| 6  | 7.618874400  | 9.916640604  | 23.384881304 |
| 1  | 6.801113819  | 9.739716532  | 24.464173665 |
| 1  | 5.987309159  | 9.211225709  | 22.978292294 |
| 1  | 7.686148908  | 9.691639904  | 22.924151453 |
| 6  | 0.692646062  | 10.364942923 | 20.650932599 |
| 1  | -0.199042068 | 9.732496080  | 20.568528625 |
| 1  | 0.954217897  | 10.381447798 | 21.710548387 |
| 6  | 0.323407135  | 11.800695695 | 20.207389150 |
| 1  | -0.500194547 | 12.191527190 | 20.817471334 |
| 1  | 1.178506910  | 12.476255183 | 20.317455544 |
| 1  | 0.011362062  | 11.821297337 | 19.156916367 |
| 6  | 0.308022890  | 8.339738560  | 18.280005267 |
| 1  | 0.369052408  | 7.270369873  | 18.066672011 |
| 1  | -0.438499837 | 8.446539014  | 19.075126835 |
| 6  | -0.206227216 | 9.071105105  | 17.017282130 |
| 1  | -1.175710813 | 8.664299041  | 16.704959913 |
| 1  | -0.329585637 | 10.143854977 | 17.205263946 |
| 1  | 0.495910454  | 8.955384677  | 16.184373024 |
| 6  | 0.598214244  | 5.287455662  | 15.808172616 |
| 1  | 0.405008387  | 4.996185366  | 15.717602883 |
| 1  | 5.612667735  | 4.84652121   | 14.948333333 |
| 6  | 5.681552293  | 4.665987651  | 17.100158994 |
| 6  | 5.592266005  | 3.573219682  | 17.069870575 |
| 1  | 6.737028878  | 4.924061581  | 17.229296262 |
| 1  | 5.143057911  | 5.025884889  | 17.982569786 |
| 6  | 7.284918006  | 6.765574672  | 14.182439582 |

|     |              |              |              |
|-----|--------------|--------------|--------------|
| 1   | 6.896385841  | 5.796615429  | 13.846567869 |
| 1   | 7.493471689  | 7.334802468  | 13.277397408 |
| 6   | 8.610898898  | 6.529254040  | 14.946198949 |
| 1   | 9.340678466  | 6.031647767  | 14.296118573 |
| 1   | 9.044684241  | 7.474885550  | 15.286466210 |
| 1   | 8.453365367  | 5.901452894  | 15.829808987 |
| 6   | 7.222924794  | 12.890529351 | 13.345687269 |
| 1   | 7.783910482  | 13.825149934 | 13.239425337 |
| 1   | 7.770694569  | 12.139723072 | 12.773400557 |
| 6   | 5.823236918  | 13.076983811 | 12.713522882 |
| 1   | 5.913602500  | 13.357966515 | 11.657329053 |
| 1   | 5.240945495  | 12.151061678 | 12.770427759 |
| 1   | 5.258274207  | 13.861791632 | 13.229404422 |
| 6   | 7.615225253  | 14.886330693 | 15.712912506 |
| 1   | 8.356483002  | 15.219943651 | 16.446489123 |
| 1   | 8.05503761   | 15.072042617 | 14.732910257 |
| 6   | 6.345002649  | 15.577012738 | 15.86397286  |
| 1   | 6.590258180  | 16.817561156 | 15.73139262  |
| 1   | 5.592147382  | 15.484756027 | 15.115745427 |
| 1   | 5.896151342  | 16.632367361 | 16.854800723 |
| 6   | 3.305631320  | 10.863820149 | 22.246940150 |
| 6   | 3.151016353  | 12.131854833 | 22.768950904 |
| 1   | 3.230376038  | 13.015994846 | 22.176123587 |
| 6   | 2.432422407  | 12.267420584 | 22.674219159 |
| 6   | 2.485957207  | 9.827762006  | 24.295151837 |
| 6   | 3.058153331  | 9.712518396  | 23.015488396 |
| 1   | 3.298817252  | 8.742303222  | 22.612179795 |
| 6   | 2.483262552  | 6.464702149  | 17.11341763  |
| 6   | 3.29112719   | 5.602021895  | 18.216648075 |
| 1   | 2.846029600  | 5.835387815  | 19.142667844 |
| 6   | 5.524396414  | 4.458583142  | 18.138274654 |
| 6   | 0.852977337  | 4.193320447  | 16.929603803 |
| 1   | 2.186664080  | 3.312746898  | 16.857294484 |
| 6   | 0.980648193  | 5.036470751  | 15.816018390 |
| 6   | 1.8107009265 | 6.171136603  | 15.920001509 |
| 1   | 1.920690250  | 6.835144865  | 15.067662533 |
| 6   | 7.428267748  | 9.810173976  | 14.318668161 |
| 6   | 6.668867276  | 9.564473629  | 12.275692571 |
| 1</ |              |              |              |



|   |              |              |              |
|---|--------------|--------------|--------------|
| 1 | 7.093590501  | 9.118467559  | 8.899665149  |
| 1 | 5.957735754  | 8.177241226  | 9.878164949  |
| 1 | 5.692106414  | 9.906155579  | 9.641162001  |
| 1 | 10.959454639 | 10.069281479 | 11.982949728 |
| 1 | 11.221888733 | 11.132944680 | 11.899220588 |
| 1 | 11.474704267 | 9.682894577  | 9.862868481  |
| 1 | 11.361948360 | 9.560881787  | 11.100773948 |
| 1 | 7.986456817  | 17.727279797 | 20.217184629 |
| 1 | 8.205091131  | 18.607657429 | 19.600539216 |
| 1 | 6.900029464  | 17.657624775 | 20.327611563 |
| 1 | 8.411301088  | 17.916470697 | 21.215161627 |
| 1 | 10.430324638 | 9.255834661  | 18.583854705 |
| 1 | 9.410405850  | 9.209570624  | 18.565020005 |
| 1 | 11.249050618 | 11.665434207 | 15.895826528 |
| 1 | 10.720860989 | 12.290228798 | 15.180669172 |
| 1 | 10.506725311 | 10.857907788 | 16.763328352 |
| 1 | 9.421948194  | 10.855427200 | 16.722139120 |
| 1 | 7.536851134  | 5.704588791  | 20.305918094 |
| 1 | 7.485493828  | 6.118085327  | 19.870816072 |
| 1 | 6.674048877  | 5.212358846  | 20.458053583 |
| 1 | 8.789645485  | 8.262374755  | 21.216461802 |
| 1 | 7.860812026  | 3.295037337  | 21.409350895 |
| 1 | 8.741611603  | 5.114126955  | 20.623238516 |
| 1 | 6.919504661  | 11.929800154 | 21.542110068 |
| 1 | 10.520727399 | 12.367750990 | 21.969393435 |
| 1 | 9.395405383  | 10.996475994 | 22.051650089 |
| 1 | 9.840131848  | 11.675672577 | 20.483182550 |
| 1 | 10.486232308 | 15.228133556 | 18.721764351 |
| 1 | 10.569711227 | 17.241281538 | 19.484181875 |
| 1 | 11.969586282 | 15.140557089 | 18.431758871 |
| 1 | 12.171211867 | 14.490029825 | 17.574537897 |
| 1 | 12.395583029 | 16.128776372 | 18.226723504 |
| 1 | 12.513708341 | 14.719652081 | 19.288666400 |
| 1 | 10.899593201 | 8.664424649  | 19.248425153 |
| 1 | 11.158176507 | 10.036741091 | 17.716760915 |
| 1 | 12.574427267 | 10.058005935 | 17.756035724 |
| 1 | 13.00471245  | 10.868738979 | 16.882838984 |
| 1 | 14.386018983 | 10.864685504 | 16.936673909 |
| 1 | 12.650818431 | 11.683632768 | 15.943582325 |
| 1 | 13.221224866 | 12.309898190 | 15.265149174 |
| 1 | 10.101227465 | 3.237013237  | 21.544788618 |
| 1 | 11.220304809 | 3.904095387  | 21.303028095 |
| 1 | 12.168311438 | 3.441175691  | 21.557486784 |
| 1 | 11.179694626 | 5.180329812  | 20.722914500 |
| 1 | 12.105754333 | 5.713893128  | 20.525477890 |
| 1 | 9.964988461  | 5.782676686  | 20.393347214 |
| 1 | 1.983327708  | 11.191619117 | 24.701653421 |
| 1 | 1.497438641  | 11.294236898 | 25.669476776 |
| 1 | 2.017124061  | 13.722261630 | 24.540131354 |
| 1 | 0.935704511  | 13.912704992 | 24.546811173 |
| 1 | 2.368485809  | 13.821859694 | 25.574569496 |
| 1 | 2.489223496  | 14.511930606 | 23.947174185 |
| 1 | 1.900242271  | 8.671442667  | 25.005872060 |
| 1 | 1.150515943  | 8.890617302  | 25.773081759 |
| 1 | 2.785225992  | 8.266795487  | 25.515317905 |
| 1 | 10.019758703 | 2.246543907  | 19.992892542 |
| 1 | 9.945020569  | 6.769531265  | 19.940295102 |
| 1 | 13.094187303 | 9.435282037  | 18.479388831 |

#### 64{B3LYP}optBS2

|    |              |              |               |
|----|--------------|--------------|---------------|
| 26 | 5.838458260  | 10.133745803 | 17.81373744   |
| 17 | 7.518120827  | 8.710443595  | 18.171033376  |
| 7  | 5.837446985  | 11.622130497 | 19.176326594  |
| 7  | 4.132966558  | 9.392183056  | 18.769315420  |
| 7  | 5.334137485  | 9.027465831  | 16.188244707  |
| 7  | 6.735076324  | 11.498335534 | 16.605254776  |
| 6  | 6.863510927  | 12.539077898 | 19.739717349  |
| 6  | 7.300090036  | 12.689878236 | 20.376797443  |
| 6  | 6.474706108  | 11.889137565 | 21.530540772  |
| 6  | 5.515981511  | 11.278439843 | 21.601781589  |
| 6  | 4.343648837  | 10.554942219 | 20.922110152  |
| 6  | 3.595832079  | 9.825134830  | 19.962857449  |
| 6  | 2.246077545  | 9.295972525  | 20.099330529  |
| 6  | 2.024305996  | 8.476616280  | 19.007459117  |
| 6  | 3.248821520  | 8.485381957  | 18.2117475143 |
| 6  | 3.605601729  | 7.608933932  | 17.162687608  |
| 6  | 4.726805100  | 7.797790703  | 16.322707130  |
| 6  | 5.383458625  | 6.832014117  | 15.443916079  |
| 6  | 6.361349458  | 7.523710163  | 14.754291665  |
| 6  | 6.273714902  | 8.915357508  | 15.252371643  |
| 6  | 6.906333835  | 10.048837269 | 14.630803004  |
| 6  | 6.923211615  | 11.324713759 | 15.252371788  |
| 6  | 7.244727287  | 12.608582652 | 14.642849988  |
| 6  | 7.323489091  | 13.530749344 | 15.670910886  |
| 6  | 7.077271267  | 12.803064340 | 16.909110738  |
| 6  | 7.304889383  | 13.242631432 | 18.234281182  |
| 6  | 8.506469512  | 13.426297210 | 21.298742973  |
| 6  | 8.602910641  | 14.409196514 | 20.839202207  |
| 1  | 8.357857169  | 13.611610918 | 22.368179929  |
| 6  | 6.689174326  | 11.598139604 | 22.997494368  |
| 1  | 7.293456073  | 12.400643431 | 23.433821721  |
| 1  | 5.748274500  | 11.600541631 | 23.546139884  |
| 6  | 7.409137605  | 10.254927806 | 23.240124764  |
| 1  | 7.556178320  | 10.090737027 | 23.414872914  |
| 1  | 6.829454938  | 9.414286012  | 22.8486161224 |
| 1  | 8.391540745  | 10.238499351 | 22.755732637  |
| 1  | 6.194876155  | 9.658590789  | 21.121639545  |
| 1  | 0.421415634  | 8.883243980  | 21.125823810  |
| 1  | 1.611548040  | 9.666907177  | 22.127613206  |
| 6  | 0.525511953  | 11.018720487 | 20.842797390  |
| 1  | -0.234121462 | 11.235832753 | 21.603776787  |
| 1  | 1.260189009  | 11.830629645 | 20.857607330  |
| 1  | 0.036617733  | 11.028627451 | 19.861215157  |
| 6  | 0.690232574  | 7.859829552  | 18.657375697  |
| 1  | 0.799208885  | 6.822445038  | 18.342656691  |

|   |              |              |               |
|---|--------------|--------------|---------------|
| 1 | 0.063237717  | 7.835228826  | 19.554660946  |
| 6 | -0.058478228 | 8.641291797  | 17.559170130  |
| 1 | -1.026625839 | 8.171629402  | 17.345702384  |
| 1 | -0.242701130 | 9.677606461  | 17.864559973  |
| 1 | 0.518112877  | 8.666346104  | 16.628270631  |
| 6 | 5.190528353  | 5.335983155  | 15.366534550  |
| 4 | 4.136327106  | 5.069607277  | 15.425230334  |
| 1 | 5.527525763  | 4.990496784  | 14.380526527  |
| 6 | 5.967223226  | 4.561865883  | 16.448952815  |
| 1 | 5.780770754  | 3.484733113  | 16.356899675  |
| 1 | 7.046051406  | 4.727903662  | 16.362945661  |
| 1 | 5.665594062  | 4.873110244  | 17.454156547  |
| 6 | 7.411205227  | 6.873448747  | 13.883893258  |
| 1 | 7.050103189  | 5.888621848  | 13.568809253  |
| 1 | 7.577723856  | 7.439264782  | 12.967663471  |
| 6 | 8.760315582  | 6.690721068  | 14.690675215  |
| 1 | 9.483001194  | 6.196638063  | 13.948698435  |
| 1 | 9.182651177  | 7.653259901  | 14.913189400  |
| 1 | 8.648499898  | 6.079964007  | 15.511729374  |
| 1 | 7.317060148  | 12.955488140 | 15.717935050  |
| 1 | 7.840819838  | 13.910638355 | 13.060920288  |
| 1 | 7.909373560  | 12.225270278 | 12.622799920  |
| 6 | 5.928228020  | 13.076275958 | 12.515814801  |
| 1 | 6.026589922  | 13.337029628 | 11.454724667  |
| 1 | 5.374868845  | 12.133812766 | 12.582899084  |
| 1 | 5.324554149  | 13.852146088 | 13.001166630  |
| 6 | 7.455220378  | 15.023350222 | 15.477009669  |
| 1 | 8.165601962  | 15.457290013 | 16.180409135  |
| 1 | 7.862594269  | 15.218703775 | 14.479628463  |
| 6 | 6.107310028  | 15.759841584 | 15.608356271  |
| 1 | 6.240408180  | 16.835146157 | 15.439559004  |
| 1 | 5.377523095  | 15.388532282 | 16.487912656  |
| 1 | 5.680369000  | 15.625572582 | 16.607606010  |
| 6 | 3.871819535  | 10.527662673 | 22.340529691  |
| 6 | 3.331858230  | 11.672628395 | 22.942801921  |
| 1 | 3.260881512  | 12.599403884 | 22.367626510  |
| 6 | 2.88326193   | 11.645156144 | 24.66218377   |
| 6 | 3.555419528  | 9.296439786  | 24.418724323  |
| 6 | 3.974335479  | 9.348062021  | 20.082180061  |
| 1 | 4.402925452  | 8.462307970  | 22.607947993  |
| 6 | 2.779639527  | 6.375116284  | 19.672437441  |
| 6 | 2.837118606  | 5.342419641  | 17.920660165  |
| 1 | 3.487380836  | 5.45393556   | 18.785363797  |
| 6 | 2.089010439  | 4.173211212  | 17.766306259  |
| 6 | 1.252281097  | 4.062132060  | 16.646202088  |
| 1 | 0.653008838  | 3.161131929  | 16.552102810  |
| 6 | 1.169885131  | 5.073917621  | 15.684282479  |
| 6 | 1.947771915  | 6.227139874  | 15.857633739  |
| 1 | 1.905543618  | 7.023381566  | 15.117301769  |
| 6 | 7.645563821  | 9.908994810  | 13.338767677  |
| 6 | 6.978051465  | 6.968585278  | 12.130147526  |
| 1 | 5.893052255  | 6.602488834  | 10.1227110296 |
| 6 | 7.686755362  | 9.574483549  | 12.925611676  |
| 6 | 9.081387297  | 9.672068209  | 10.959535353  |
| 1 | 9.641268823  | 5.980635234  | 10.029537051  |
| 6 | 9.779226791  | 9.886569226  | 12.157583064  |
| 6 | 9.045606510  | 10.012114183 | 13.339196215  |
| 1 | 9.563140625  | 10.188353438 | 14.479201874  |
| 6 | 8.075378075  | 14.508491074 | 18.441130386  |
| 6 | 9.443266849  | 14.572472557 | 18.140848262  |
| 1 | 9.945667750  | 13.693136038 | 17.748626502  |
| 6 | 9.498924790  | 16.872481868 | 18.850231912  |
| 6 | 8.132484440  | 16.839075374 | 19.155473505  |
| 6 | 7.433300734  | 15.645279209 | 18.950037566  |
| 6 | 6.373093962  | 15.593391815 | 19.188146140  |
| 6 | 3.602665157  | 7.136970803  | 16.602606313  |
| 6 | 2.191509449  | 3.041938107  | 18.764959848  |
| 1 | 2.826539684  | 2.232162302  | 18.380787673  |
| 1 | 2.629727993  | 3.378607727  | 17.910339214  |
| 1 | 1.208953837  | 2.606632471  | 18.981730264  |
| 6 | 0.279967126  | 4.924235241  | 14.4717071397 |
| 1 | -0.439995621 | 4.109643530  | 14.600002001  |
| 1 | -0.282045154 | 5.843802446  | 14.270000167  |
| 1 | 0.869888024  | 4.704158210  | 13.570998401  |
| 6 | 6.950841199  | 9.369318195  | 9.620077380   |
| 1 | 7.640002047  | 9.121319872  | 8.806543158   |
| 6 | 6.215180477  | 8.559996635  | 9.697139366   |
| 1 | 6.403126846  | 10.274001904 | 9.325658721   |
| 6 | 11.289482513 | 9.969150610  | 11.875878741  |
| 1 | 11.658080532 | 10.659065229 | 11.399883229  |
| 1 | 11.663831375 | 10.309054533 | 13.139327980  |
| 6 | 11.740931129 | 8.989667269  | 11.964433904  |
| 6 | 7.439288154  | 18.059028580 | 19.719881245  |
| 1 | 7.728070897  | 18.970219938 | 19.183161703  |
| 1 | 6.350165993  | 17.963994685 | 19.660826302  |
| 1 | 7.700360015  | 18.01381320  | 20.775849583  |
| 7 | 10.611875572 | 9.219266549  | 19.231919808  |
| 1 | 9.612026794  | 9.050730923  | 19.104999884  |
| 6 | 11.06857442  | 11.533666535 | 16.383403199  |
| 1 | 10.501514012 | 12.177413361 | 15.74757626   |
| 6 | 10.475786654 | 10.775531520 | 17.368799980  |
| 6 | 9.397962500  | 10.827116119 | 17.493350988  |
| 7 | 5.525382200  | 7.068612643  | 20.882201683  |
| 1 | 6.041628550  | 7.669496927  | 20.241315023  |
| 1 | 4.643755840  | 6.774193999  | 20.47265057   |
| 6 | 5.670558404  | 4.838517150  | 21.806042512  |
| 1 | 4.600177551  | 4.703648934  | 21.708214336  |
| 6 | 6.280100401  | 6.033455123  | 21.439684635  |
| 6 | 9.826749184  | 12.652072632 | 21.111739472  |
| 1 | 10.662028767 | 13.219009593 | 21.541748288  |
| 1 | 9.792726023  | 11.672618597 | 21.599514335  |
| 1 | 10.045274189 | 12.479662388 | 20.053680883  |
| 1 | 10.17136839  |              |               |



1 9.53344855 27.070326115 31.503512731  
1 11.690709571 28.382433956 31.260080914  
1 10.384282060 27.504412323 37.040269468  
1 10.553488259 26.737562384 36.268332362  
1 11.050860989 27.241791264 37.883902110  
1 8.911385178 27.416937835 37.522698076  
1 8.685995897 26.402185480 37.89923456  
1 8.715325120 28.141606231 38.332380159  
1 8.214074633 27.642937494 36.697219180  
1 11.741842027 29.753878074 38.752679679  
1 11.774393807 28.682584493 39.027125089  
1 12.749783752 30.153031645 38.950615590  
1 10.727471962 30.475123636 39.681781906  
1 11.009094018 30.336097155 40.742079203  
1 10.700458178 31.557517576 39.468737733  
1 9.706235596 30.082170086 39.535570454  
1 14.443923110 34.566460116 35.926426040  
1 14.770586482 35.623367310 35.908962671  
1 14.627362673 34.207262895 36.951562828  
1 15.331502659 33.755219336 34.945209607  
1 16.398164059 33.842046528 35.221831178  
1 15.058788144 32.685468672 34.962211876  
1 15.210704564 34.118499139 33.909158322  
1 12.868418281 36.735378682 34.285144225  
1 12.220369628 37.605914391 34.474273400  
1 13.825369626 36.947053513 34.789216494  
1 13.133069606 36.632581296 32.759684460  
1 13.599535141 37.561098201 36.282242516  
1 13.806718017 35.787637552 32.530092281  
1 12.190074544 36.473515277 32.208044305  
1 4.992526750 30.494961734 32.333145946  
1 10.050906496 27.368155280 33.925428617  
1 8.886590504 26.566788032 33.908864237  
1 7.906598757 27.050965623 33.981563655  
1 8.972507554 25.160121876 33.803986246  
1 11.433909490 25.343602916 33.713885800  
1 11.318237536 26.745838630 33.829252107  
1 12.219666736 27.368221781 33.847799718  
1 13.536405898 25.337325558 33.139539798  
1 13.269710228 32.281495411 37.689007339  
1 13.132925906 33.171012274 38.777809944  
1 12.253531072 33.822429776 38.825490440  
1 14.109305248 33.227439393 39.79542479  
1 15.233997226 32.379132109 39.706049291  
1 15.998042520 32.416437214 40.492718674  
1 15.400134905 31.480766935 38.624617799  
1 14.406565389 31.439473357 37.624552759  
1 14.507796032 30.745646951 36.782927203  
1 16.611589915 30.567240609 38.561916477  
1 16.542701672 29.757347620 39.314016733  
1 16.706365263 30.092670652 37.570488818  
1 17.546782361 31.120563703 38.765882269  
1 13.958132761 34.199774415 40.956252600  
1 12.908753577 34.262402707 41.295030113  
1 14.578569161 33.900790638 41.818714671  
1 14.267377616 35.222142566 40.664035212  
1 9.761603578 37.148397954 34.234929019  
1 9.590710048 37.806227422 32.982423536  
1 9.455160255 37.206837901 32.096037931  
1 9.581819847 39.214590248 34.908374506  
1 9.733642225 39.963164085 34.093919112  
1 9.901117049 39.35312016 35.35445305  
1 9.918042385 37.922214166 35.40691489  
1 10.044513614 37.413436517 36.368791456  
1 6.980240548 24.65644130 34.52899839  
1 10.078839589 40.158907648 36.618432843  
1 11.150250898 40.344864426 36.828917594  
1 9.585876821 41.143492063 36.30716658  
1 9.657464625 39.64212665 37.499039059  
1 9.402759490 39.917328559 31.57325925  
1 8.505781857 40.564809558 31.573782049  
1 10.268836979 40.564569478 31.33852178  
1 9.292147425 39.192378141 30.749925135  
1 9.715931960 41.059231798 34.049746660

**2<sup>1</sup>{BP86}optBS3**

6 8.140465100 30.034336958 31.180570271  
6 7.663264979 29.989385323 29.746382097  
1 7.673351994 28.939848458 29.399144813  
1 6.619470084 30.327242084 29.659639705  
6 8.544815630 30.833341871 28.790752249  
1 8.181252392 30.755813452 27.755727558  
1 8.529138792 31.898979027 29.085924675  
1 9.596256880 30.494698989 28.820927206  
6 9.376941573 27.77273664 31.129198624  
1 8.70120879 27.546708737 30.580594922  
6 10.823381001 27.878221947 30.593032935  
1 11.122117507 26.93774457 30.094961337  
1 10.922813199 28.701084784 29.862453674  
6 6.028140701 32.231573710 31.110057762  
6 6.003435066 33.110969155 30.008914832  
6 6.833708808 33.814964594 29.870548593  
6 4.935929598 33.097223165 29.059423960  
6 3.882448061 32.186997572 29.310610560  
6 3.045636628 32.164259985 28.589678304  
6 3.871726941 31.302480217 30.399163289  
6 4.959537001 31.329007099 31.291233961  
6 4.910973132 34.057805464 27.917414689  
1 5.926549666 34.247776377 27.527040151  
1 4.293237960 33.669216949 27.088705722  
1 4.486959899 35.038129582 28.2110858437  
6 2.705893512 30.358359796 30.619081918  
1 1.877319587 30.862930279 31.153298885  
1 2.296755695 29.988733723 29.661605027  
1 3.001209600 29.484372490 31.625212781

6 9.932554948 24.569451359 34.078072777  
1 9.956870862 23.471181634 34.051589702  
1 12.462346186 24.553416126 33.812075520  
1 12.920685200 24.359923287 34.801134875  
1 12.333812948 23.575349247 33.315411400  
6 7.405120557 24.434992644 34.346420080  
1 7.596394662 23.381144768 34.613407033  
1 6.848474807 24.438446579 33.389418905  
26 9.592168677 32.249220012 34.457082056  
7 8.549049206 33.644723405 33.537589232  
7 8.874224159 30.903942124 33.221258551  
7 10.722180433 30.872947092 35.277180293  
7 10.855044591 33.634745982 35.062738608  
17 8.140297602 32.225473746 36.190849797  
6 8.475077257 34.961080839 33.986790699  
6 7.124245977 35.477966291 33.804277588  
6 6.409183633 34.487547566 33.135587979  
6 7.334784753 33.379896159 32.915364444  
6 7.171110205 32.253112173 32.076712114  
6 8.052306390 31.148624762 32.122448835  
6 8.909069562 29.052392492 31.794771474  
6 9.292508959 29.578525496 33.102257217  
6 9.842455389 28.866614267 34.193518124  
6 10.369282411 29.526568556 35.327304662  
6 10.785777185 28.948727079 36.598088281  
6 11.499483762 29.939031230 37.269273292  
6 11.508423909 31.110832962 36.400240504  
6 12.98477971 32.278225843 36.510762954  
6 12.066976197 33.423946856 35.715753947  
6 12.922533787 34.601261007 35.563588811  
6 12.155945223 35.57040964 34.927248491  
6 10.837404219 34.982153940 34.711300050  
6 9.637559308 35.655352940 34.348583324  
6 6.526953631 36.754731860 34.352080974  
1 5.602387319 36.986617685 33.791211679  
1 7.199532971 37.611439875 34.194156580  
6 6.184800862 36.650632985 35.857023707  
1 5.735738951 37.601109428 35.215339818  
1 5.470649200 35.836931952 36.052551319  
6 7.090302040 36.455870028 36.455655599  
6 4.922137214 34.530110960 32.865205887  
4 5.82340301 35.581678444 32.902173259  
1 4.687500362 34.169798579 31.851668051  
6 4.105940167 33.709252756 33.891208546  
1 3.023963926 33.786304969 33.675084957  
1 4.388269785 32.642772122 33.859286225  
1 4.281163331 34.068042833 34.920636762  
1 9.308973547 26.918715918 31.814613363  
1 11.536103179 28.071259728 31.414080578  
6 10.408160517 27.608286869 37.187534994  
1 10.517169582 26.800780899 36.448211713  
1 11.11098997 27.366975128 38.006474480  
6 8.967140062 27.587242696 37.747974764  
1 8.735997299 26.599357170 38.187918845  
1 8.830895800 28.355154277 38.529702375  
1 8.230137787 27.790964316 36.951864486  
6 12.000835139 29.825496169 38.690998496  
1 12.077255752 28.755421960 38.958387063  
1 13.016762224 30.236228356 38.791890603  
1 16.070541733 30.524708246 39.709674568  
1 11.460074206 30.402910137 40.737447855  
1 10.990579038 31.604732054 39.496811944  
6 12.000835139 29.825496169 38.690998496  
1 10.50316649 30.103917869 39.673356938  
1 14.399395125 34.730746541 35.862030446  
1 14.657521447 35.804384056 35.922023735  
1 16.48762998 34.303553700 36.845135697  
6 15.288246347 34.066370040 34.785600363  
1 16.359041713 34.201114703 35.025824457  
1 15.086389727 32.982743578 34.721274489  
1 15.01961715 34.50264244 33.787795106  
6 12.676500082 36.887828950 34.397460488  
1 11.993583868 37.717568572 34.638852879  
1 13.632122617 37.123217036 34.901265335  
6 12.915366691 36.863850047 32.870083125  
1 13.324073970 37.831088552 32.523711790  
1 13.628687172 36.068140433 32.589280213  
1 11.973602673 36.676577842 32.324913051  
1 4.986545595 30.637462544 32.142554611  
6 9.871077131 27.373086270 34.148478175  
6 8.679393205 26.63127536 34.263582500  
1 7.728224947 27.166374117 34.376094825  
6 8.695261391 25.223146306 34.235392701  
6 11.141342544 25.283743010 33.953876019  
6 11.094860284 26.688938969 33.996317890  
1 12.022580148 27.269144052 33.915573002  
1 13.189842112 25.141961216 33.225826031  
6 13.440548689 32.276522104 37.479428464  
6 13.401445720 33.047891247 38.65569892  
1 12.521565604 33.672015118 38.855773954  
6 14.470666694 33.022812704 39.575132637  
6 5.588752339 32.220595887 39.283732241  
1 16.428049913 32.197348015 39.992728095  
6 15.661756076 31.444117841 38.107982380  
6 14.577509279 31.477772381 37.218399384  
1 14.597406757 30.870352668 36.305054075  
6 6.874610977 30.578376227 37.830164476  
1 16.909595922 29.705399549 38.509757718  
1 16.867997705 30.194171827 36.795723391  
6 17.815647753 31.139666028 37.978273756  
6 14.417428428 33.857637868 40.839185577  
1 13.442837211 33.755559362 41.349693311  
1 15.207478737 33.564039993 41.551779982  
6 14.553320246 34.932818149 40.615630667  
6 9.603967375 37.148055406 34.478899545  
6 9.500874720 37.933687132 33.10672839  
1 9.442646463 37.432341560 32.336542521

**4<sup>1</sup>{BP86}optBS1**

6 8.257779351 30.126080291 31.091185422  
6 7.830356595 30.139983391 31.091073070  
1 7.918782119 29.117325704 29.228015998  
1 6.768717799 30.418973526 29.542644646  
6 6.86274622 31.104223888 27.717488259  
1 8.363176939 31.060817348 28.774025385  
1 8.574218828 32.146164756 29.121068904  
1 7.954311995 30.840520815 28.821394404  
6 9.589260790 27.906681925 31.06037548  
1 8.987389321 27.701817067 30.101130994  
6 11.077836897 28.065681012 30.593398232  
1 11.436171657 27.160158905 30.069562731  
1 11.212429333 28.932621880 29.922095154  
6 5.992422861 32.205189391 31.132858616  
6 5.823335636 33.150672632 30.095415718  
1 6.562967709 33.951391710 29.977410823  
6 4.719388912 30.075245349 29.213095828  
6 3.781980606 32.032918837 29.390169851  
1 9.236313751 31.964883536 28.708616730  
6 3.921762630 31.074270782 30.423602917  
6 5.034964507 31.170774807 31.284869725  
6 4.536682850 34.111698673 28.116643780  
1 5.509663250 34.016057427 27.677802609  
1 3.895124795 33.730602022 27.302681505  
1 4.059867362 35.030630281 28.510054694  
6 2.894933603 29.966038129 30.590965354  
1 1.882073379 30.377009005 30.769452181  
1 2.836022264 29.331765840 29.685866229  
1 1.343737916 29.313129174 31.445341096  
6 9.943158410 24.558729274 34.008647616  
1 9.964978383 23.462050992 33.976228543  
6 12.491763042 24.532505045 34.084600254  
1 12.810286526 12.810230707 35.124282769  
1 12.425997510 23.562887557 33.560833394  
6 7.395063467 24.439964606 30.949312284  
1 7.566553361 23.361163885 34.108064417  
1 6.964609616 25.959032025 32.969060712  
26 9.570371669 32.262096501 34.482715113  
6 7.559825622 33.648400103 33.541226293  
7 8.886412646 30.923712133 33.197433948  
7 10.717471664 30.883864125 35.261672634  
7 10.862327058 33.639148296 35.076506340  
17 7.996050802 32.155744623 36.289858946  
6 8.494035995 34.970515746 34.034167917  
6 7.121350736 35.458559497 33.894543614  
6 6.389834954 34.465758065 33.227964775  
6 7.320427915 33.376759356 33.94979816  
6 7.166406057 32.273180487 32.063922688  
6 8.093688331 31.199012519 32.078201774  
6 9.040575197 29.135142419 31.69777555  
6 9.353879486 29.606583427 33.048982655  
6 8.959427356 28.872700458 34.149005477  
6 10.336574055 29.531286488 35.305939555  
6 10.677463037 28.975767744 36.615100060  
6 11.388812291 29.966346130 36.63038026  
6 11.480750493 31.122782998 36.417556532  
6 12.307479028 32.264591416 36.519226715  
6 12.104119581 33.393726500 35.68087364  
6 12.986868703 34.539803157 35.461430654  
6 12.18656184 35.530223227 34.836223587  
6 10.868427351 34.986774274 34.680327364  
6 9.665813342 35.673639739 34.376606556  
6 6.527411265 36.700162509 34.52832809  
1 5.57812721 36.921841494 34.037962172  
1 7.166106085 37.580367327 34.347113098  
6 6.297721068 36.543074396 36.051082848  
1 5.837761139 27.458021459 36.468429861  
1 5.634614633 35.687390000 36.26684988  
1 7.25231807 36.36499048 36.575058949  
6 4.890214212 34.475440841 33.029339349  
1 4.519414360 35.512472511 33.134834657  
1 4.620899377 34.155070859 32.009726979  
6 4.144891523 33.572714046 34.050489071  
1 3.051698016 33.630005633 33.896792965  
1 4.448672366 32.517753773 33.937226435  
1 4.372439064 37.88443391 35.087612428  
1 9.492606437 27.015706998 31.646573939  
1 11.715257551 28.223612634 31.480980543  
6 10.210332726 26.66447396 37.207657148  
6 10.348532985 26.834583999 36.496277924  
6 10.835205576 27.423025519 38.088245385  
6 8.721116560 27.707035929 37.647009746  
1 8.423784784 26.742543926 38.099114589  
1 8.547928631 28.500906324 38.385579934  
1 8.

6 10.850729740 30.684954113 39.692860970
11.166515718 30.578718092 40.747360953
10.852387394 31.758298031 39.435765425
1 9.811962144 30.323796188 39.599278738
14.482106452 34.604048610 35.683847250
1 14.809902575 35.659501690 35.632036694
14.749375252 34.249343147 36.692202681
1 15.281041287 33.781316051 34.636393896
1 16.368186052 33.874789896 34.814983142
1 15.014221123 32.711087113 34.692416085
1 15.066246878 34.130580138 33.610435522
1 12.754794292 36.830184746 34.276370096
1 12.089586228 37.673605601 34.522951310
1 13.727102887 37.055384534 34.754333388
1 12.953574423 36.782881037 32.736145585
1 13.371064765 37.738478595 32.367806014
1 13.644304851 35.969461537 32.449631400
1 11.991615151 36.606450570 32.222182110
1 15.170443610 30.436645200 32.082142163
1 9.886155513 27.374198633 34.09550771
1 6.882079744 26.635542780 34.04216828
1 7.727768819 27.17398041 34.003352343
1 6.895876797 25.22225200 34.004288468
1 11.164711428 25.271080379 34.054706455
1 11.120743786 26.680873262 34.099055711
1 12.052748930 27.255408059 34.143379322
1 13.293851012 25.124960732 33.610573350
1 13.425309019 32.276785894 37.51829834
1 13.421365311 33.194203986 38.592697822
1 12.582795101 33.891911759 38.694396882
1 14.477250297 33.219212634 39.532972478
1 15.543941506 32.307396913 37.375908832
1 16.368167182 32.319519742 40.099700869
1 15.573649006 31.374450495 38.310492496
1 14.503255442 31.366574081 37.392600241
1 14.497427874 30.646347795 36.566981670
1 16.733826761 30.404200865 38.165757980
1 16.877238180 29.809492684 39.089220418
1 16.568409384 29.700359412 37.334268604
1 17.684266533 30.937009650 37.974238053
1 14.470442808 34.223706800 40.616785740
1 13.448699137 34.387563968 41.059335035
1 15.103389665 33.886724875 41.511982775
1 14.856066486 35.208145659 40.342219370
1 9.639154629 37.170050607 34.560690939
1 9.398835394 37.948903724 33.29901925
1 9.223396003 37.442134532 34.34234630
1 9.378523609 39.359291813 33.60709673
1 9.602364107 39.985003725 34.60393754
1 9.841396904 39.234500102 35.783016709
1 9.857970955 37.824760746 35.782512101
1 10.043376620 37.221735791 36.586919095
1 6.683774519 24.788196062 34.28011071
1 10.103446868 39.930736219 37.107946899
1 11.176952539 40.178254543 37.225387066
1 9.539450330 40.877209670 37.185278092
1 9.818274622 39.292159822 37.961983623
1 9.091771330 40.189171631 37.122165138
1 8.034428077 40.517847048 32.09608367
1 9.716603421 41.100092690 32.09370210
1 9.280539630 39.613902993 31.198409937
1 9.588160161 41.080669495 34.669274730

41{BP86}optB33

6 8.186602437 30.092281522 31.115266266
7 7.70055421 30.069734768 29.684427060
1 7.753522067 29.033507553 29.60210629
1 6.641498149 30.366283920 29.318317002
1 8.536421073 30.982403894 28.758063422
1 8.173630622 30.916138212 27.715865853
1 8.468704718 32.036806799 29.07852850
1 9.603057188 30.694642296 28.775141510
1 9.463779106 27.853310580 31.035988803
1 8.825857551 27.643017151 30.115779409
1 10.932713892 27.969713403 30.565848935
1 11.252273634 27.04467359 30.068059923
1 11.063168917 28.815757552 29.80162798
1 5.994367535 32.203604478 31.151020221
1 8.584318125 33.071459852 30.052974605
1 6.609897420 33.833373194 29.864054007
1 4.728079521 32.97009876 29.19694784
1 3.760042418 31.985975818 29.46644483
1 2.888235027 31.89609397 28.803174290
1 3.878490242 31.107435775 30.563290887
1 5.005428288 31.225570930 31.393036701
1 4.566757028 33.921789159 28.027012555
1 5.538124894 34.148025483 27.552174168
1 3.898119852 33.503252593 27.24557856
1 4.131488980 34.886882371 28.351613465
1 2.816714265 30.058343727 30.830383955
1 1.823996033 30.519972602 30.988938814
1 2.715262160 29.360377804 29.977900856
1 3.056502744 29.461668563 31.727116112
1 9.971146959 24.594057579 34.021277098
1 10.000276858 23.495945463 33.999223011
1 12.510049699 24.584428058 33.879036505
1 12.916153073 24.387298949 34.889965000
1 12.408945339 23.608368895 33.127183523
1 7.435680547 24.450944748 34.80668459
1 7.629387988 23.375961308 34.239253035
1 6.853469232 24.551003653 33.448470568
1 9.594222902 32.272308721 34.449299698
1 7.593392656 33.664392390 33.4971345585
1 7.885781102 30.923859403 33.177649961
1 10.745067707 30.889796123 35.26706926

61{BP86}optB51

1 9.945091542 41.127132987 32.187051822
1 9.604865220 39.657288391 31.229220566
1 9.563240353 41.057668243 34.733618314
1 8.192455633 30.065308499 31.116458167
1 7.776428691 30.063766504 29.661526707
1 7.838992135 29.031304409 29.268769763
1 6.723855923 30.369170568 29.550001151
1 8.662135683 30.986142587 28.780867734
1 8.339323759 30.939696582 27.724103667
1 8.589439282 32.035685672 28.116458544
1 9.723136138 30.686470328 28.833603531
1 9.510748588 27.842512485 31.043467324
1 8.88664861 27.622443027 30.155181833
1 10.986010746 28.007503607 30.589282709
1 11.337441457 27.096694607 30.070829056
1 11.096283646 28.863834143 29.900687968
1 6.001221826 32.215478105 31.071252224
1 6.884000618 33.134882790 30.00407217
1 6.650343493 33.908225986 29.860405957
1 4.801516078 33.063855848 29.990209448
1 8.828181928 32.957340119 29.282297196
1 2.985598232 31.993514448 28.82013850
1 9.312582387 31.128752453 30.348121650
1 5.00849689 21.6481328 31.210886489
1 4.679275623 34.067047577 27.961835367
1 5.665388373 34.302317614 27.526207005
1 4.027803805 33.687239387 27.155389421
1 4.244228654 35.021945959 28.316077371
1 2.846742494 30.060745003 30.526779820
1 1.843611097 30.509509112 30.65463360
1 2.792933645 29.393107198 29.649591628
1 3.050181199 29.434327186 31.412120635
1 9.955601188 24.529114361 34.000918312
1 9.979720497 24.33362119 33.54748522
1 12.50584400 23.53032521 31.08007006
1 12.862830232 24.316681822 35.048250618
1 12.424672261 23.533943586 33.509299574
1 7.407477850 24.402749514 34.003257232
1 7.584434492 23.325203584 31.61545826
1 6.891254207 24.517091779 33.030912353
1 9.426097150 32.257020087 33.445295644
1 8.550931295 33.714589144 33.445293885
1 8.806055126 30.869434132 33.225195928
1 7.810310730 30.831516693 35.254235386
1 7.10849472648 33.690737325 35.150528465
1 7.901065492 32.159846648 36.402690533
1 8.482441959 35.026481435 33.933148987
1 7.108277544 35.524550340 33.780136717
1 6.386965955 34.532854487 33.102975456
1 7.319779504 33.428115378 32.839792137
1 7.156206601 32.275639159 32.095195165
1 6.037465836 31.156540302 32.086614436
1 9.686572678 29.076019701 31.732959999
1 9.289434269 29.560366143 33.081562971
1 9.864053160 28.841680465 34.168314729
1 10.416354454 29.487884778 35.307475543
1 10.791307059 28.927403973 36.167204226
1 11.507034166 29.920734440 37.292823462
1 11.571410896 31.087050993 36.40283590
1 12.352193539 32.269294011 36.513579432
1 12.101015396 33.433139812 35.732411278
1 12.977488767 34.58945966 35.506923259
1 12.200961848 35.577504456 34.888329752
1 10.848401253 35.026813066 34.734154443
1 9.651082279 35.708693745 34.367157348
1 6.502420534 36.766710935 34.396852915
1 5.536906949 36.981429247 33.99075336
1 7.139131349 37.648711639 34.222430494
1 6.257348638 36.641942915 35.922673189
1 5.789188483 37.534866561 36.329279136
1 5.94870203 35.762871172 36.137731964
1 7.206952099 36.445928377 36.458711353
1 4.890888846 34.581001271 32.87525236
1 4.527348577 35.593548454 32.956746268
1 4.639343972 34.21797822 31.855822082
1 4.161001011 33.743679715 33.894059465
1 3.021776834 33.673695857 33.715172467
1 4.413074559 32.614559448 33.806442976
1 4.321230421 33.993477821 33.90454217
1 9.436317985 26.957638626 31.695631592
1 11.645218127 28.185249887 31.457814248
1 10.339226711 27.616799307 37.219254570
1 10.475434866 26.783914689 36.511265343
1 10.977393352 27.384690667 38.093034407
1 8.85646545 27.648247476 37.678576888
1 8.574125784 26.684256596 38.140920313
1 8.685720574 28.452525913 38.415535976
1 8.183662951 27.832243310 36.82306110
1 11.943272793 29.841048805 38.739651112
1 11.967472119 28.779489433 39.050860542
1 12.969619542 30.222183724 38.867701840
1 10.997332747 30.618179654 39.694299263
1 11.330160760 30.507837109 40.743005333
1 10.985116745 31.693646995 40.494000576
1 9.960675016 30.246487061 39.615751785
1 14.475562151 36.661586167 35.710929724
1 14.794892301 35.720118278 35.671880895
1 14.758617614 34.293647178 36.710931935
1 15.267351256 33.862426884 34.641283643
1 16.355780097 33.961125267 34.801002043
1 15.090071146 32.78971833 34.682209933
1 15.038921060 34.226614382 33.629195765
1 12.735217537 36.876182186 34.323020451
1 12.063930341 37.717789631 34.588034217

|   |               |              |              |   |              |              |              |   |              |              |              |
|---|---------------|--------------|--------------|---|--------------|--------------|--------------|---|--------------|--------------|--------------|
| 1 | 13.702005445  | 37.110676459 | 34.808243131 | 6 | 11.537252159 | 29.898242409 | 37.238057976 | 6 | 9.970922000  | 5.886587000  | 11.590634000 |
| 6 | 12.948476477  | 36.820073896 | 32.786615280 | 6 | 11.571186089 | 31.073256919 | 36.365075235 | 6 | 10.487839000 | 5.151260000  | 10.436740000 |
| 1 | 13.359926776  | 37.777087961 | 32.415908176 | 6 | 12.330999247 | 32.265193557 | 36.508223346 | 6 | 9.515963000  | 5.234384000  | 9.429752000  |
| 1 | 13.649870265  | 36.011869331 | 32.511952456 | 6 | 12.080926176 | 34.442203183 | 35.750809668 | 6 | 8.399087000  | 5.999423000  | 9.979386000  |
| 1 | 11.993604946  | 36.630592173 | 32.65018265  | 6 | 12.953738956 | 34.604832806 | 35.583251659 | 6 | 7.283244000  | 6.556381000  | 9.314531000  |
| 1 | 5.101890032   | 30.503825477 | 32.057506672 | 6 | 12.190200329 | 35.589718395 | 34.961317246 | 6 | 11.747662000 | 4.318081000  | 10.359227000 |
| 6 | 8.982784693   | 27.343784219 | 34.114651930 | 6 | 10.857715414 | 35.019102863 | 34.756705049 | 1 | 12.606549000 | 4.852806000  | 10.793590000 |
| 6 | 8.689802175   | 26.601059447 | 34.08656078  | 6 | 9.673952000  | 35.697686492 | 34.351570257 | 1 | 11.998799000 | 4.143018000  | 9.296187000  |
| 1 | 7.734290012   | 27.136477286 | 34.106625096 | 6 | 6.569637729  | 36.828212690 | 34.274958596 | 6 | 11.600114000 | 2.944385000  | 11.069308000 |
| 6 | 8.706650233   | 25.188612573 | 34.034685819 | 1 | 5.624349970  | 37.054333510 | 33.747532403 | 1 | 12.532005000 | 2.358417000  | 10.969845000 |
| 1 | 11.175917889  | 25.244565510 | 34.026074776 | 1 | 7.231275139  | 37.690487236 | 34.099167574 | 1 | 10.772902000 | 2.357612000  | 10.633583000 |
| 1 | 11.128939315  | 26.653403575 | 34.087636170 | 6 | 6.277547856  | 36.720526170 | 35.790131951 | 1 | 11.388677000 | 3.075083000  | 12.144572000 |
| 1 | 12.059789192  | 27.230508378 | 34.114133821 | 1 | 5.822966273  | 37.656649277 | 36.163798765 | 6 | 9.921000000  | 4.527916000  | 8.094689000  |
| 1 | 13.287956381  | 25.099243443 | 33.507144007 | 1 | 5.584915541  | 35.888157807 | 36.005441199 | 1 | 10.649858000 | 4.285656000  | 7.879344000  |
| 1 | 13.489213190  | 32.280528271 | 37.489386424 | 1 | 7.204613642  | 36.536953135 | 36.359938376 | 1 | 9.257603000  | 5.188595000  | 7.279340000  |
| 6 | 13.494471191  | 33.176514126 | 38.582447421 | 6 | 4.942932981  | 34.629974407 | 32.778338043 | 6 | 8.761078000  | 3.217586000  | 8.052280000  |
| 1 | 12.652305574  | 33.865197653 | 38.710220639 | 1 | 4.611424303  | 35.684239932 | 32.815593578 | 1 | 8.901529000  | 2.706672000  | 7.082360000  |
| 6 | 14.559957317  | 33.185924452 | 39.511766610 | 1 | 4.699047630  | 34.268168023 | 31.767561349 | 1 | 7.684770000  | 3.425938000  | 7.172476000  |
| 1 | 15.629213280  | 32.282712994 | 39.322891796 | 6 | 4.126551251  | 33.818858886 | 33.812160910 | 1 | 9.056643000  | 2.523036000  | 8.856928000  |
| 1 | 16.4559601968 | 32.281048725 | 40.039992048 | 1 | 3.043850881  | 33.910134875 | 33.607157020 | 6 | 9.465605000  | 8.656479000  | 8.270020000  |
| 1 | 15.653170375  | 31.375122967 | 38.236653295 | 1 | 4.393962735  | 32.748920469 | 33.777177325 | 1 | 9.310457000  | 8.915193000  | 8.063183000  |
| 6 | 14.572638490  | 31.381551050 | 37.331155966 | 1 | 4.316381742  | 34.175703540 | 34.839563453 | 1 | 9.320414000  | 8.092362000  | 7.393154000  |
| 1 | 14.561422632  | 30.679700942 | 36.490365890 | 1 | 9.31898597   | 26.937365906 | 31.714735283 | 6 | 5.785978000  | 9.968708000  | 8.389102000  |
| 6 | 16.818450893  | 30.417160332 | 35.057396194 | 1 | 11.536116358 | 28.123359747 | 31.387638956 | 1 | 5.689649000  | 10.571663000 | 7.467670000  |
| 1 | 16.984988926  | 29.809924772 | 38.966782704 | 6 | 10.421552107 | 27.97964202  | 37.131866448 | 1 | 6.856997000  | 9.750016000  | 8.540523000  |
| 1 | 16.643118315  | 29.724703261 | 37.216748096 | 1 | 10.550020931 | 26.765551844 | 36.400158660 | 1 | 5.437437000  | 10.580072000 | 9.250960000  |
| 1 | 17.760388757  | 30.961461736 | 37.853401932 | 1 | 11.088239940 | 27.336645112 | 37.980025961 | 6 | 2.695145000  | 8.446493000  | 10.434543000 |
| 6 | 14.560491387  | 34.163290662 | 40.674379351 | 6 | 8.958137052  | 27.876930404 | 37.623133300 | 1 | 1.875646000  | 7.790766000  | 10.367703000 |
| 1 | 13.539868629  | 34.327955227 | 41.062589002 | 1 | 8.702536435  | 26.596328246 | 38.074798234 | 1 | 2.472055000  | 8.706104000  | 9.382692000  |
| 1 | 15.188508749  | 33.800424728 | 41.506608411 | 1 | 8.795503995  | 28.355728480 | 38.397850428 | 6 | 2.678226000  | 9.746667000  | 11.282283000 |
| 1 | 14.956518984  | 35.151308621 | 40.568161277 | 1 | 8.525895644  | 27.775015933 | 36.804040036 | 1 | 1.698569000  | 10.252173500 | 11.193219000 |
| 6 | 9.624053679   | 37.204453872 | 34.460636723 | 1 | 11.990860604 | 29.791947068 | 38.676810040 | 1 | 3.460488000  | 10.450612000 | 10.945494000 |
| 6 | 9.409834983   | 37.999730185 | 33.309087264 | 1 | 12.044977314 | 28.723535011 | 38.957082296 | 1 | 2.860737000  | 9.523723000  | 12.348379000 |
| 1 | 9.255327912   | 37.506199731 | 32.343116508 | 1 | 13.007951168 | 30.193328903 | 38.806772434 | 6 | 7.227948000  | 6.565782000  | 7.814192000  |
| 6 | 9.391177725   | 39.409211176 | 33.38934129  | 1 | 11.036884479 | 30.514156752 | 39.657499618 | 6 | 6.009593000  | 5.725357000  | 7.140092000  |
| 6 | 9.585243889   | 40.017572297 | 34.621842606 | 1 | 11.385400371 | 30.388947400 | 40.699490925 | 1 | 5.660273000  | 5.063480000  | 7.722210000  |
| 6 | 9.794147125   | 39.251028385 | 35.820937434 | 1 | 10.987742687 | 31.594737561 | 39.438360378 | 6 | 6.238722000  | 5.711056000  | 5.729970000  |
| 6 | 9.812762967   | 37.842903057 | 35.709951008 | 1 | 10.103617171 | 30.114186663 | 39.584550771 | 6 | 7.093831000  | 6.571402000  | 5.001596000  |
| 1 | 9.971867486   | 37.227192217 | 36.601959793 | 6 | 14.441349904 | 34.696534407 | 35.840597186 | 1 | 7.047056000  | 6.569479000  | 3.905201000  |
| 1 | 6.707423941   | 24.750884194 | 34.784448740 | 1 | 14.741728221 | 35.760591127 | 35.839032881 | 6 | 8.013613000  | 7.427667000  | 5.648388000  |
| 6 | 10.023100263  | 39.928128165 | 37.166111788 | 1 | 14.699529130 | 34.308418030 | 36.837979964 | 6 | 8.078582000  | 7.406798000  | 7.060748000  |
| 1 | 11.090123824  | 40.191954497 | 37.300675552 | 6 | 15.277543438 | 33.944290583 | 34.779040913 | 1 | 8.796150000  | 8.050001000  | 7.582369000  |
| 1 | 9.442056731   | 40.863826079 | 37.246494181 | 1 | 16.358286432 | 34.055246771 | 34.984470522 | 6 | 5.268419000  | 4.970623000  | 5.009506000  |
| 1 | 9.734941120   | 39.269777235 | 37.999713144 | 1 | 15.038420992 | 32.866442850 | 34.778853048 | 1 | 5.791976000  | 4.157496000  | 4.268080000  |
| 6 | 9.137256715   | 40.257332051 | 35.15346254  | 1 | 15.077989432 | 34.332905648 | 33.764282939 | 1 | 4.500577000  | 5.367301000  | 4.759394000  |
| 1 | 8.081324881   | 40.588361312 | 32.107197705 | 1 | 12.728835283 | 36.905539340 | 34.445613095 | 1 | 4.749558000  | 4.122068000  | 5.175310000  |
| 1 | 9.764014816   | 41.167698458 | 32.153726636 | 1 | 12.043332719 | 37.736357511 | 34.673645290 | 6 | 8.897920000  | 8.364253000  | 4.842970000  |
| 1 | 9.349198824   | 39.695168774 | 31.229357373 | 1 | 13.674348895 | 37.137030372 | 34.969828862 | 1 | 9.808010000  | 8.641476000  | 4.502896000  |
| 1 | 9.571499923   | 41.112396185 | 34.725778721 | 6 | 12.998564570 | 36.882665467 | 32.922812139 | 1 | 8.365654000  | 9.303055000  | 5.493670000  |
|   |               |              |              | 1 | 13.414857075 | 37.850113055 | 32.586281876 | 1 | 9.210440000  | 7.903796000  | 3.888674000  |
|   |               |              |              | 1 | 13.716766937 | 36.086729438 | 32.655819237 | 6 | 2.386938000  | 6.230230000  | 12.601959000 |
|   |               |              |              | 1 | 12.067295926 | 36.696548261 | 32.359563475 | 6 | 1.831672000  | 5.317938000  | 11.673480000 |
|   |               |              |              | 1 | 5.052991456  | 30.618832359 | 32.243458056 | 1 | 2.499636000  | 4.706789000  | 11.057790000 |
|   |               |              |              | 6 | 9.920994218  | 27.365745153 | 34.074451297 | 6 | 0.433265000  | 5.159696000  | 11.356146500 |
|   |               |              |              | 6 | 8.741436085  | 26.597234844 | 34.138122597 | 6 | -0.405937000 | 5.969711000  | 12.165165000 |
|   |               |              |              | 1 | 7.776245906  | 27.110913131 | 34.223618048 | 1 | -1.494480000 | 5.852210000  | 12.276819000 |
|   |               |              |              | 6 | 8.787163757  | 25.189752985 | 34.101063127 | 6 | 14.401809000 | 8.962005000  | 12.055300000 |
|   |               |              |              | 6 | 11.239901668 | 25.301955310 | 33.907515930 | 6 | 12.994255000 | 7.020481000  | 11.965179000 |
|   |               |              |              | 1 | 11.162973191 | 26.704914649 | 33.959347693 | 1 | 12.540467000 | 7.070835200  | 11.414037000 |
|   |               |              |              | 1 | 12.080627142 | 27.304135459 | 33.915338863 | 6 | -0.157461000 | 4.158631000  | 10.580856000 |
|   |               |              |              | 1 | 13.310353483 | 25.198997050 | 33.237060345 | 1 | 0.624562000  | 3.700730000  | 9.915150000  |
|   |               |              |              | 6 | 13.449555784 | 32.277374790 | 37.500758622 | 1 | -0.903543000 | 4.629157000  | 9.913959000  |
|   |               |              |              | 6 | 13.400894347 | 33.118526757 | 38.629585889 | 1 | -0.672154000 | 3.340347000  | 11.118972000 |
|   |               |              |              | 1 | 12.531798589 | 37.733596372 | 38.769044892 | 6 | 15.300280000 | 7.786979000  | 11.187928000 |
|   |               |              |              | 6 | 14.440957943 | 33.121069120 | 39.580912378 | 1 | 16.215988000 | 7.245821000  | 10.890438000 |
|   |               |              |              | 6 | 15.541092727 | 32.267852610 | 39.374473519 | 1 | 15.621094000 | 8.699360000  | 11.277609000 |
|   |               |              |              | 1 | 16.355384371 | 32.258490357 | 39.12497859  | 1 | 14.782666000 | 8.113229000  | 10.626950000 |
|   |               |              |              | 6 | 15.625199336 | 31.420645614 | 38.249190405 | 8 | 6.543618000  | 1.547697000  | 10.491033000 |
|   |               |              |              | 6 | 14.567318969 | 31.432345272 | 37.324245900 | 6 | 4.455746000  | 1.823451000  | 10.676230000 |
|   |               |              |              | 1 | 14.599424444 | 30.770883090 | 36.449529745 | 6 | 4.795886000  | 3.076496000  | 9.665080000  |
|   |               |              |              | 6 | 16.828263495 | 30.518698813 | 38.052638612 | 1 | 5.133723000  | 3.874283000  | 10.348450000 |
|   |               |              |              | 1 | 17.001231401 | 29.877493367 | 38.937142393 | 6 | 3.712326000  | 3.281330000  | 8.786188000  |
|   |               |              |              | 1 | 16.698888461 | 29.858324026 | 37.177963844 | 6 | 2.124331000  | 4.257709000  | 7.779132000  |
|   |               |              |              | 1 | 17.752383939 | 31.106643267 | 37.894894917 | 6 | 3.274988000  | 2.252730000  | 7.926245000  |
|   |               |              |              | 6 | 14.380693034 | 34.039312707 | 40.786342248 | 1 | 2.431212000  | 2.417525000  | 7.248710000  |
|   |               |              |              | 1 | 13.347369040 | 34.147009877 | 41.161270205 | 6 | 3.936480000  | 1.006257000  | 7.953351000  |
|   |               |              |              | 1 | 15.007078883 | 33.633580988 | 41.614054913 | 1 | 3.605166000  | 1.965750000  | 7.293340000  |
|   |               |              |              | 1 | 14.742217965 | 35.055608504 | 40.535422219 | 6 | 5.020440000  | 0.787307000  | 8.818790000  |
|   |               |              |              | 1 | 9.657916492  |              |              |   |              |              |              |

1 6.856309000 3.450098000 17.217099000  
 1 5.496495000 2.542495000 16.569060000  
 6 9.584789000 8.657862000 17.151649000  
 1 10.641732000 8.909057000 17.358930000  
 1 9.224977000 8.098072000 18.029283000  
 6 8.774035000 9.975834000 17.029364000  
 1 8.873132000 10.578914000 17.950440000  
 1 7.701776000 9.764553000 16.871089000  
 1 9.128793000 10.583767000 16.177687000  
 1 11.844161000 8.450790000 14.978546000  
 1 12.664602000 7.797412000 14.642958000  
 1 12.070798000 8.712543000 16.029111000  
 1 11.853849000 9.749492000 14.128640000  
 1 12.832439000 10.257757000 14.207361000  
 1 11.070980000 10.451912000 14.466995000  
 1 11.668432000 9.524080000 13.063643000  
 6 7.306682000 6.583458000 17.623389000  
 6 8.222324000 5.748210000 18.307126000  
 1 8.875199000 5.083765000 17.731642000  
 6 8.282764000 5.739517000 17.917836000  
 6 7.420075000 6.599133000 20.436525000  
 1 7.457455000 6.599696000 21.529810000  
 6 6.503051000 7.450929000 17.799490000  
 6 6.448769000 7.425186000 18.368139000  
 1 5.732528000 8.063254000 17.838929000  
 6 9.258906000 4.831438000 20.444916000  
 1 8.772615000 4.314826000 21.292330000  
 1 10.109762000 5.406599000 20.859759000  
 1 9.671449000 4.064374000 19.768015000  
 6 5.609427000 8.385149000 20.576300000  
 1 4.711781000 8.672398000 20.002626000  
 6 1.642407000 9.183646000 20.844725000  
 1 5.276686000 7.917638000 21.520413000  
 12 1.158159000 6.245296000 12.802250000  
 6 12.743596000 5.349753000 13.728671000  
 1 12.095362000 4.736016000 14.362555000  
 6 14.145757000 5.216932000 13.825202000  
 6 14.958380000 6.015104000 12.986216000  
 1 16.049788000 5.924322000 13.054858000  
 6 1.020683000 6.884468000 13.298777000  
 6 1.524590000 7.002134000 13.413852000  
 1 1.955320000 7.701095000 14.139192000  
 6 14.768325000 4.230103000 14.797109000  
 1 13.999456000 3.736966000 15.414983000  
 1 15.485473000 4.728731000 15.476215000  
 1 15.324250000 3.437414000 14.261740000  
 6 -0.804249000 7.746700000 14.140328000  
 1 -1.718839000 7.196999000 14.426560000  
 1 -1.126107000 8.649712000 13.855174000  
 1 -0.307258000 8.088701000 15.064919000  
 8 7.842907000 1.592757000 14.780571000  
 6 8.932559000 1.853312000 15.597437000  
 6 9.599160000 3.102596000 15.632422000  
 1 9.267380000 3.911079000 14.963346000  
 6 10.682914000 3.291069000 16.505464000  
 1 11.186391000 4.264455000 16.531819000  
 6 11.114086000 2.250359000 17.354193000  
 1 11.958076000 2.402637000 18.034248000  
 6 10.446502000 1.006660000 17.311830000  
 1 10.773425000 0.188129000 19.962074000  
 6 9.362305000 0.804776000 16.440305000  
 1 8.831514000 -0.149699000 16.398217000  
 1 7.623700000 2.37624000 14.188834000

**2<sup>2</sup>{BP86}optBS2**

7 5.875440948 6.964390575 11.408659903  
 7 8.607449599 6.590537369 11.293980617  
 6 6.053770440 7.187390279 10.046914748  
 4 4.898522021 7.896792209 9.504131057  
 6 3.969631605 7.992054840 10.534576760  
 6 4.555328926 7.313320714 11.689649836  
 6 3.891005259 6.869899509 12.856679824  
 6 9.963844152 6.356852424 11.480415223  
 6 10.510473065 5.635243814 10.345447656  
 6 9.483128288 5.538103713 9.401736803  
 6 8.328004523 6.213953018 9.979341401  
 6 7.150369023 6.643299725 9.333225797  
 1 11.863940669 4.972971645 10.214242383  
 1 12.674671781 5.676144993 10.462716797  
 1 12.019643677 4.691627529 9.157096586  
 6 12.005988477 3.704053514 11.086878630  
 1 12.981285984 3.219095459 10.895227888  
 1 11.202778877 2.974937281 10.885348271  
 1 11.958339101 3.953877072 12.161365710  
 6 9.560473639 4.742701744 8.118256292  
 1 10.623789703 4.603271906 7.805309244  
 1 9.106774829 5.290209399 7.279005412  
 6 8.893555830 3.353035110 8.239327887  
 1 9.016304274 2.782914255 7.300381828  
 7 8.121818163 3.446801956 8.440642606  
 1 9.334814210 2.765875789 9.062088351  
 6 4.758303429 8.561941464 8.153592311  
 1 3.686808043 8.753933296 7.961208109  
 1 5.095012820 7.896154718 7.345357034  
 6 5.526220251 9.899814277 8.099304400  
 1 5.381782040 10.362986391 7.065922081  
 1 6.609155729 9.746429643 7.214045972  
 1 5.178738164 10.615553031 8.825777456  
 6 2.699437517 8.810339503 10.476434343  
 1 1.846828421 8.265662845 10.907975333  
 2 2.440508257 8.991767748 9.417487660  
 2 8.839295862 10.173565725 11.196492066  
 1 1.906116415 10.759112521 11.092905271  
 1 3.664250997 10.769760869 10.762923110  
 1 3.049375678 10.035581348 12.267801387

6 7.045701690 6.529169777 7.843995549  
 6 6.186391406 5.571506151 7.267983343  
 1 5.600787120 4.917299772 7.925686218  
 6 6.080697314 5.438300131 5.870863517  
 6 6.849366550 6.293878106 5.056335786  
 1 6.780309582 6.194361789 3.964177720  
 6 7.708295925 7.267929834 5.601470549  
 6 7.804223453 7.367109365 7.002837587  
 1 4.846222425 8.099348490 7.452841974  
 6 5.149700119 4.411854839 5.253549477  
 1 5.563245681 4.000592777 4.316945197  
 1 4.165859885 4.858119512 5.010213492  
 1 4.965114486 3.569049372 5.944249383  
 6 8.502861118 8.194665793 4.702485310  
 1 9.483508140 8.445423466 5.144121488  
 1 7.967267446 9.149490196 4.536405303  
 1 8.680187302 7.742391857 3.710948916  
 6 2.396527310 6.941471159 12.004921500  
 6 1.612477615 6.089936592 11.101998720  
 1 2.113851387 5.379131694 11.433442571  
 6 0.207016833 6.137601326 12.148181340  
 6 -0.404316269 7.079192810 13.000872530  
 1 -1.501389278 7.131018093 13.039289314  
 6 14.131758200 8.063615360 11.484818421  
 1 12.732591816 7.940247360 11.584478998  
 1 12.082264894 8.549160846 10.944545722  
 6 -0.633760124 5.184181611 11.321986585  
 1 -0.058668377 4.763479720 10.478951607  
 1 -1.529715869 5.683898399 10.910868661  
 1 -0.988940670 4.332566805 11.934339672  
 6 14.759820509 9.063596629 10.533917650  
 1 15.692972072 8.670947860 10.091873274  
 1 15.018245816 10.006084287 11.054778100  
 1 14.074186858 9.322533168 9.708485372  
 6 9.162338018 1.797623198 11.589983152  
 6 8.495156952 7.068659680 10.971145777  
 6 7.103926157 0.784735596 10.571525311  
 6 6.506711055 1.636205836 11.095675880  
 6 6.492716777 -0.304780567 10.111343261  
 1 5.407674935 -0.288695388 9.958093152  
 6 7.250706721 -1.408242669 6.688830222  
 1 6.766363385 -2.256951732 9.193282162  
 6 8.637354271 -1.415450075 9.917515992  
 1 9.241594688 -2.272834779 9.596412135  
 6 9.262778794 -0.336471166 10.554560759  
 1 10.342022032 -0.328924121 10.739776756  
 1 8.539677769 2.551660157 11.761134874  
 26 7.277506138 6.531140499 12.729988244  
 17 7.163757806 4.161837874 12.614581224  
 7 8.680511968 6.957344866 14.036166980  
 7 5.945711051 6.601330603 14.156051301  
 6 8.498099782 7.206209771 15.395135092  
 6 9.632391375 7.957008662 15.921181569  
 6 10.552943140 8.069722476 14.884223335  
 6 9.988539934 7.352772209 13.744559961  
 6 10.659507832 6.913407856 12.583525838  
 6 4.589076789 6.345708987 13.969845914  
 6 4.053550430 5.630468044 15.121411589  
 6 5.094846184 5.523808376 16.045714535  
 6 6.236669925 6.215281360 16.467059792  
 6 7.412290118 6.653209967 15.114654527  
 6 2.690783261 4.995557483 15.285178453  
 1 1.892471129 5.702387961 15.011015034  
 1 2.538024088 4.769100018 16.356191563  
 6 2.513433754 3.690204510 14.476189800  
 1 1.529643746 3.237627568 14.699463517  
 1 3.302198935 2.954895228 13.066416193  
 1 2.556968605 3.886154428 13.316220466  
 6 5.041158889 4.705408613 17.316324947  
 1 3.982280040 4.522282561 17.576295630  
 1 5.473189841 5.251827882 18.168335621  
 6 5.756454271 3.342146629 17.171812542  
 1 5.637083063 2.744439772 18.093610396  
 1 6.837935342 3.477963917 16.993330681  
 1 5.347791632 2.763571556 16.326977582  
 6 9.756648093 8.639837640 17.264202198  
 1 10.822251011 8.868490737 15.400225504  
 1 9.444290246 7.969942481 18.079270893  
 6 8.944217454 9.952223146 17.348521821  
 1 9.079077900 10.431565479 18.335684192  
 1 7.866072090 9.759938325 17.206490016  
 1 9.262475334 10.670387370 16.571579453  
 6 11.795950156 8.929278717 14.921149627  
 1 12.662772799 8.402791327 14.494489648  
 1 12.053723119 9.139922818 15.975103255  
 1 6.160948439 10.012776332 14.177649758  
 1 12.522783158 10.889497508 14.256331225  
 1 10.766031849 10.846687173 14.597657596  
 1 11.402269980 10.103791612 13.106179924  
 6 7.521970328 6.537926865 17.602166010  
 6 8.415039893 5.605835909 18.169502953  
 1 9.023241495 4.979321025 17.505230018  
 6 8.522395130 5.458865231 15.564923251  
 6 7.720761328 6.275276630 20.387621117  
 1 7.888205452 6.163338082 21.478750033  
 6 6.826982076 7.223011540 19.851486226  
 6 6.732250645 7.338303096 18.4051221883  
 1 6.023644731 8.049483144 18.008333122  
 6 9.485407435 4.456758284 20.170273140  
 1 9.064968627 3.988753477 21.078382292  
 1 10.346840136 4.941235778 20.465149451  
 1 9.733118035 3.652606225 19.456324360  
 6 5.990359943 8.100946542 20.761116269  
 1 5.018272973 8.351077636 19.350883393  
 1 6.503786480 9.057108075 20.979087906  
 1 5.793322736 7.620807254 21.279574282

6 12.147955082 7.037013594 12.496915848  
 12 12.982027654 6.242629797 13.309641515  
 1 12.523257169 5.545656973 14.022010214  
 6 14.383159886 6.324445087 13.211781416  
 6 14.937600374 7.243781315 12.299016614  
 1 16.030762788 7.320972299 12.217570149  
 6 0.350277910 7.954080424 13.805826911  
 6 1.755341647 7.864331284 13.757644906  
 1 2.366036510 8.520728625 14.390557592  
 6 15.276129549 5.425989121 14.044635050  
 1 14.735941220 5.012050460 14.913740695  
 1 16.164179751 9.967579615 14.418897630  
 1 15.645527772 4.568833581 13.448891243  
 6 -0.331080191 8.982287570 14.669759242  
 1 -1.340340992 8.651213331 14.990174910  
 1 -0.447576139 9.949582511 14.160945028  
 1 0.252696766 9.179805990 15.604395461  
 8 5.272735923 1.787156638 13.897908006  
 6 9.907928310 0.688064118 14.400552731  
 6 7.310351798 0.584702362 14.490863589  
 1 7.944650430 1.391896487 14.105513850  
 6 7.884051343 -0.572838630 15.073279957  
 1 8.976560014 -0.650714998 15.093024388  
 6 7.077994317 -1.625454932 15.499141396  
 1 7.533580202 -2.527474625 15.923423202  
 6 5.680120247 -1.513931059 15.401187830  
 1 0.037710416 -2.330712800 15.753112501  
 6 5.091578204 -0.365488945 14.856689992  
 1 4.003716377 -0.264414060 14.772499308  
 1 5.93658864 2.492700101 13.658572590

**4<sup>2</sup>{BP86}optBS1**

7 5.91541221 6.652517469 11.337060120  
 7 8.63989439 6.265985013 11.318347249  
 6 6.172157061 7.042824810 10.006742130  
 6 7.8009101692 5.600937232 9.500513672  
 6 4.024759782 7.727345646 10.475662290  
 6 4.59503592 9.942323031 11.584192476  
 6 3.861280204 6.866167281 12.674804285  
 6 9.971608836 5.878580292 11.573304146  
 6 10.485378147 5.135663388 10.424823626  
 6 5.10096215 5.210795190 9.418489413  
 6 8.394847052 5.983704998 9.960461376  
 6 7.283451111 6.539883705 10.799495320  
 1 11.741267490 4.296078231 10.353815967  
 1 12.598775969 4.823532519 11.999494671  
 1 12.001820598 4.125830997 11.925617682  
 6 11.577170094 2.919706738 10.056346000  
 1 12.507771053 2.329835951 10.965990335  
 1 10.075288005 2.338726723 10.670285011  
 1 11.350845646 3.046975252 12.128344410  
 6 9.574752377 4.483424626 10.894953255  
 1 10.627038362 4.212173337 7.888010524  
 1 9.258744747 5.139865473 7.268449039  
 6 8.711603279 3.193501689 8.069313433  
 1 8.842281692 2.665965696 7.107911071  
 1 7.640442927 3.430160298 8.184324935  
 1 8.987929165 2.503188541 8.884375041  
 6 4.967707112 8.641726831 8.245570846  
 1 3.910661896 8.879504881 8.023270727  
 1 5.346547161 8.082470123 7.375874463  
 6 5.762047675 9.969458993 8.776261130  
 1 5.666193025 10.567900605 7.448289708  
 1 6.834655520 9.770222007 8.543197724  
 1 5.391084123 10.576350492 9.218113628  
 6 2.705082358 8.463711479 10.565212924  
 1 1.879668744 7.815889954 10.754682507  
 1 2.482772645 8.727260428 9.369492247  
 6 2.702540810 9.762165911 11.271168606  
 1 11.87012875 10.278903665 11.817012875  
 1 3.493373020 10.458038357 10.937932619  
 1 2.563785009 9.533993860 12.336998910  
 6 7.254678983 6.566483464 7.78631117  
 6 6.342689426 5.747115098 7.080103871  
 6

Table with 4 columns of numerical data. The first column contains a range of numbers from 1 to 26. The second, third, and fourth columns contain corresponding numerical values. The data is organized into two main sections: the first section covers rows 1-26, and the second section covers rows 27-908. The values in the second and third columns are generally in the range of 14.7 to 15.1, while the fourth column values range from 6.2 to 12.2.

42{BP86}optBS2

62{BP86}optBS1

Table with 4 columns of numerical data. The first column contains a range of numbers from 7 to 17. The second, third, and fourth columns contain corresponding numerical values. The data is organized into two main sections: the first section covers rows 7-17, and the second section covers rows 18-908. The values in the second and third columns are generally in the range of 5.7 to 6.2, while the fourth column values range from 5.7 to 12.2.

|    |              |              |              |   |              |              |              |    |              |              |               |
|----|--------------|--------------|--------------|---|--------------|--------------|--------------|----|--------------|--------------|---------------|
| 6  | 2.634785590  | 8.436949236  | 10.336864534 | 1 | 8.835900380  | 4.131153363  | 21.210173291 | 6  | -0.704106090 | 5.166114920  | 10.608157716  |
| 1  | 1.817956327  | 7.780116131  | 10.675058340 | 1 | 10.173160113 | 5.218208794  | 20.767598073 | 1  | -0.073161361 | 4.934758768  | 9.732276453   |
| 2  | 2.415326901  | 8.680206769  | 9.280531849  | 1 | 9.687551919  | 3.910551636  | 19.655027898 | 1  | -1.624372157 | 5.260973640  | 10.246535870  |
| 6  | 2.603168108  | 9.748216360  | 11.166822457 | 6 | 5.659153626  | 8.208824943  | 20.698467138 | 1  | -1.006400363 | 4.00016964   | 11.057940013  |
| 1  | 1.620225762  | 10.244737367 | 11.069993796 | 1 | 4.790156351  | 8.577651884  | 20.127080774 | 6  | 14.897166651 | 8.313345275  | 11.012122822  |
| 1  | 3.382305581  | 10.453307827 | 10.285892663 | 1 | 6.217111631  | 9.093944388  | 21.061495988 | 1  | 15.736991701 | 7.806975637  | 10.502054222  |
| 2  | 2.779952408  | 9.540903378  | 12.236888802 | 1 | 5.280971952  | 7.675363382  | 21.589292997 | 1  | 15.334235752 | 9.122310664  | 11.626897771  |
| 6  | 7.245672544  | 6.575412158  | 7.764508975  | 6 | 12.188038209 | 6.370432423  | 12.787174130 | 1  | 14.267077943 | 8.788450955  | 10.240673401  |
| 6  | 6.341652953  | 5.713798386  | 7.098228910  | 6 | 12.771541554 | 5.478710111  | 13.718972617 | 8  | 8.506831062  | 1.560491130  | 10.1061370909 |
| 1  | 5.681001582  | 5.070195169  | 7.688564333  | 1 | 12.121027238 | 4.884419300  | 14.369244128 | 6  | 7.747496529  | 1.056956000  | 10.513131164  |
| 6  | 6.299743501  | 5.651256300  | 5.688573333  | 6 | 14.172246029 | 5.320170096  | 13.795345740 | 6  | 6.340032877  | 0.606733617  | 10.452151156  |
| 6  | 7.172195041  | 6.485200101  | 5.009550470  | 6 | 14.985601823 | 6.088672514  | 12.930012983 | 1  | 5.811542898  | 1.471788437  | 10.871106789  |
| 1  | 7.149673750  | 6.445730207  | 3.854097632  | 1 | 16.075867621 | 5.974516082  | 12.980167819 | 6  | 5.631706367  | -0.452796599 | 9.863007551   |
| 6  | 8.079888099  | 7.361997194  | 5.588367984  | 6 | 6.050566645  | 6.884855319  | 13.256708800 | 1  | 4.536758078  | -0.404221320 | 9.826168975   |
| 6  | 8.115827757  | 7.389014868  | 7.001231243  | 6 | 1.450158459  | 7.061468275  | 13.372456422 | 6  | 6.306271964  | -1.564348521 | 9.331506502   |
| 1  | 8.824265380  | 8.046705503  | 7.516798125  | 1 | 1.851655658  | 7.787745938  | 14.088021765 | 1  | 5.746635984  | -2.387720340 | 8.872962805   |
| 6  | 5.335368078  | 4.713841875  | 4.982222774  | 6 | 14.792316819 | 4.338741753  | 14.774847617 | 6  | 7.710675648  | -1.606144467 | 9.901000542   |
| 1  | 5.845499904  | 4.130471596  | 4.193575688  | 1 | 14.019376986 | 3.816507084  | 15.363308922 | 1  | 8.254697597  | -2.467384769 | 8.934928877   |
| 1  | 4.516772100  | 5.275525109  | 4.492034266  | 1 | 15.472837354 | 4.849158256  | 15.482510541 | 6  | 8.432329090  | -0.557100685 | 9.986050868   |
| 1  | 4.877716353  | 4.001829261  | 5.688984856  | 1 | 15.388569943 | 3.569734495  | 14.248619887 | 1  | 9.525266779  | -0.579897746 | 10.045398905  |
| 6  | 9.882860119  | 8.267303180  | 4.768609614  | 6 | -0.902438993 | 7.714107013  | 14.089929226 | 1  | 7.922285691  | 2.292427502  | 11.401412992  |
| 1  | 9.862747688  | 8.593002289  | 5.534953155  | 1 | -1.926033492 | 7.304161599  | 14.069819655 | 26 | 7.019264384  | 6.10208644   | 12.657976616  |
| 1  | 8.466287675  | 9.179487844  | 4.442190878  | 1 | -0.952099928 | 8.760519833  | 13.739125020 | 17 | 6.901906869  | 3.816508815  | 12.582310362  |
| 1  | 9.344109665  | 7.758554922  | 3.857083525  | 1 | -0.580171237 | 7.751030924  | 15.155570574 | 7  | 8.451601723  | 6.655132084  | 10.473939853  |
| 2  | 3.242831039  | 6.306225670  | 12.580803192 | 8 | 7.831201644  | 1.447818719  | 14.804824843 | 7  | 5.591630572  | 6.562327985  | 14.123358360  |
| 6  | 1.824384032  | 5.357425240  | 11.664326495 | 6 | 8.925784788  | 1.692505231  | 15.622057652 | 6  | 8.197945391  | 6.988114076  | 15.396027637  |
| 2  | 2.518384962  | 4.759223198  | 11.065231073 | 6 | 9.626539334  | 2.923266698  | 15.628836779 | 6  | 9.350322612  | 7.697060424  | 15.948961555  |
| 6  | 0.435234809  | 5.150231115  | 11.539073726 | 1 | 9.317766045  | 3.729738662  | 14.955676088 | 6  | 10.343123812 | 7.674609986  | 14.969149902  |
| 6  | -0.436704227 | 5.926590119  | 12.340804058 | 6 | 10.715717905 | 3.094879081  | 16.507118516 | 6  | 9.781533124  | 6.967128080  | 13.820966663  |
| 1  | -1.520001285 | 5.775342590  | 12.254119265 | 1 | 11.248568087 | 4.052965985  | 16.517034072 | 6  | 10.454606008 | 6.525440103  | 12.648580609  |
| 6  | 14.430971535 | 6.992579921  | 11.993926386 | 6 | 11.116875541 | 2.056501899  | 17.373020869 | 6  | 4.866075822  | 6.262877776  | 13.847488526  |
| 1  | 13.025520567 | 7.118430209  | 11.926604414 | 1 | 11.966829153 | 2.194719409  | 18.048848022 | 6  | 6.388090510  | 5.517656177  | 14.966583928  |
| 1  | 12.572088694 | 7.799479038  | 11.827501983 | 6 | 10.413221500 | 0.832265801  | 17.351938241 | 6  | 4.620026699  | 5.473787640  | 15.964461625  |
| 6  | -0.115183060 | 4.112558536  | 10.576064391 | 1 | 10.716782649 | 0.015764904  | 18.015937207 | 6  | 5.833942560  | 6.171710190  | 15.435001843  |
| 1  | 0.696546975  | 3.571686867  | 10.062105131 | 6 | 9.324062919  | 0.646557474  | 16.485359787 | 6  | 7.033747054  | 6.547118860  | 16.092456742  |
| 1  | -0.756455956 | 4.578678572  | 9.804183188  | 1 | 8.766817476  | -0.293370896 | 16.455144197 | 6  | 2.328243130  | 4.764634809  | 15.017139819  |
| 1  | -0.739867485 | 3.364718625  | 11.104027005 | 1 | 7.646438668  | 2.219232277  | 14.192771557 | 1  | 1.532597488  | 5.408851760  | 14.728492686  |
| 6  | 15.331449787 | 7.811359272  | 11.085279970 | 1 | 1.189760514  | 7.192562719  | 14.366298429 | 1  | 2.190767282  | 4.358834554  | 16.106618820  |
| 1  | 16.109613696 | 7.181976310  | 10.616286906 | 6 | 2.377277564  | 4.554050664  | 14.120493083 | 6  | 2.377277564  | 4.554050664  | 14.120493083  |
| 1  | 15.854213159 | 8.608399896  | 11.648612318 | 1 | 1.424084483  | 2.95459789   | 14.229475388 | 1  | 1.424084483  | 2.95459789   | 14.229475388  |
| 1  | 14.755759703 | 8.297203630  | 10.789451533 | 7 | 5.634133337  | 6.864229884  | 11.272026680 | 1  | 3.203400474  | 2.822674780  | 14.387896584  |
| 8  | 6.454343013  | 1.423253005  | 10.660319101 | 7 | 8.472730772  | 6.543426592  | 11.218847896 | 1  | 2.497160152  | 3.773273068  | 13.057248892  |
| 5  | 5.392972624  | 1.743901023  | 9.827415105  | 6 | 5.909722742  | 7.256612584  | 9.971163877  | 6  | 4.513463900  | 4.714279610  | 17.264231252  |
| 6  | 4.832849190  | 3.042438219  | 9.750972249  | 6 | 4.809646009  | 8.074457228  | 9.464976477  | 1  | 3.459101847  | 4.777662145  | 17.988043808  |
| 1  | 5.231146889  | 3.846284614  | 10.379200857 | 6 | 3.822635055  | 8.070899092  | 10.450664272 | 1  | 5.111013494  | 5.181927937  | 18.058515446  |
| 6  | 3.767404839  | 3.286201085  | 8.859932716  | 6 | 4.331235299  | 7.250199592  | 11.549220209 | 6  | 4.923273802  | 3.227785298  | 17.139717647  |
| 1  | 3.344418580  | 4.295496569  | 8.797283195  | 6 | 3.621980558  | 6.770151656  | 12.686039188 | 1  | 4.840265551  | 2.724131954  | 18.120392613  |
| 6  | 3.250344436  | 2.252355893  | 8.051362243  | 6 | 9.777817028  | 6.143359284  | 11.459697678 | 1  | 5.963817489  | 3.317420618  | 16.782687946  |
| 1  | 2.421279428  | 2.447773543  | 7.363837361  | 6 | 10.303996587 | 5.442482681  | 10.286720990 | 1  | 4.27535812   | 6.689191355  | 16.424847460  |
| 6  | 3.812832768  | 0.960155705  | 8.142962908  | 6 | 9.315753294  | 5.511489012  | 9.305408174  | 6  | 9.428414852  | 8.487674158  | 17.235424044  |
| 1  | 3.418231882  | 0.146974833  | 7.524145161  | 6 | 8.200453788  | 6.259273217  | 8.98909089   | 1  | 10.485807638 | 7.834099089  | 17.441305889  |
| 6  | 4.877176281  | 0.702719855  | 9.021698578  | 6 | 7.041746444  | 6.777657878  | 9.254860943  | 1  | 9.081986410  | 7.892981618  | 18.093878499  |
| 1  | 5.326367106  | -0.290322340 | 9.150440242  | 6 | 11.590472315 | 4.656291748  | 10.170166754 | 6  | 6.15519294   | 8.902020168  | 17.110169674  |
| 1  | 6.733470311  | 2.202322655  | 11.225528182 | 1 | 12.449564906 | 5.255337519  | 10.515928240 | 1  | 8.720576142  | 10.369316526 | 18.110528223  |
| 26 | 7.266001904  | 6.176251381  | 12.702023222 | 1 | 11.776770701 | 4.439378098  | 9.102558289  | 1  | 7.542067303  | 9.596774890  | 17.015143077  |
| 17 | 7.337096229  | 3.743046265  | 12.646908426 | 6 | 11.563673587 | 3.319354264  | 10.947742336 | 1  | 8.958858689  | 10.446123391 | 16.352995140  |
| 6  | 8.658905424  | 6.697940667  | 14.109929396 | 1 | 12.501602358 | 2.759994239  | 10.773706562 | 6  | 11.661684405 | 8.408242608  | 15.064893830  |
| 7  | 8.515108789  | 6.438447774  | 14.474786172 | 1 | 10.715224128 | 2.684783316  | 10.641411536 | 1  | 12.484081003 | 7.804051929  | 14.656312428  |
| 6  | 8.394843217  | 7.059381459  | 15.441142128 | 1 | 11.471980123 | 3.492598199  | 12.033940848 | 1  | 11.904726587 | 8.568385829  | 16.162993500  |
| 6  | 9.548349379  | 7.793767804  | 15.968416965 | 6 | 9.367481225  | 4.792143760  | 7.974748838  | 6  | 11.637895096 | 9.777968811  | 14.348836885  |
| 6  | 10.548246123 | 7.753014234  | 14.894301241 | 1 | 10.420440979 | 4.546186514  | 7.74420512   | 1  | 12.610211395 | 10.292092151 | 14.4661410943 |
| 10 | 10.005906058 | 7.004816172  | 13.848988541 | 1 | 9.022466528  | 5.440935495  | 7.157537631  | 1  | 10.851873379 | 10.434573583 | 14.769202079  |
| 6  | 10.695722249 | 6.492924736  | 12.712389200 | 6 | 8.539974838  | 3.485405357  | 9.272800015  | 1  | 11.439029876 | 10.655042045 | 13.269938015  |
| 6  | 4.492701016  | 6.050121278  | 13.874816634 | 1 | 8.666059029  | 2.953206477  | 7.011432554  | 6  | 7.129192681  | 4.661320082  | 17.581843775  |
| 6  | 3.970295737  | 5.298680672  | 15.024833453 | 1 | 7.464204198  | 3.698254136  | 8.100176911  | 6  | 8.055254878  | 5.573262920  | 18.171416565  |
| 6  | 4.954361939  | 5.338556261  | 16.023068820 | 1 | 8.848108263  | 2.810777057  | 8.788507118  | 1  | 8.653334431  | 4.927055235  | 17.519120970  |
| 6  | 6.082509556  | 6.110353873  | 15.485852029 | 6 | 4.781951672  | 8.922828668  | 8.213994799  | 6  | 8.189812740  | 5.496134833  | 19.570838393  |
| 6  | 7.249316585  | 6.584143712  | 16.144603590 | 1 | 3.739599191  | 9.230365644  | 8.011016092  | 6  | 7.385481411  | 6.330003115  | 20.374539100  |
| 6  | 2.701082270  | 4.478564055  | 15.105210032 | 1 | 5.105437994  | 8.345447019  | 7.334582724  | 1  | 7.483364553  | 6.276225462  | 21.467731608  |
| 1  | 1.852218711  | 5.015012098  | 14.654745238 | 6 | 5.659946635  | 10.190905201 | 8.334145396  | 6  | 6.456211092  | 7.228462119  | 15.499298506  |
| 1  | 2.438611606  | 4.325882031  | 16.162884102 | 1 | 5.594003965  | 10.798455155 | 7.412575990  | 6  | 6.332780688  | 7.277372692  | 18.411497692  |
| 6  | 2.836471659  | 3.090291984  | 14.422524406 | 1 | 6.719996050  | 9.925090200  | 8.493091744  | 1  | 5.607661966  | 7.960955086  | 17.2051735496 |
| 1  | 1.894858459  | 5.250148546  | 14.521874836 | 1 | 5.340551822  | 10.820201865 | 9.184        |    |              |              |               |

|   |              |             |              |
|---|--------------|-------------|--------------|
| 1 | 10.262959876 | 0.419851127 | 18.234393740 |
| 6 | 9.168022334  | 1.792367095 | 16.972808263 |
| 1 | 8.718333054  | 2.349961939 | 17.801791144 |
| 1 | 7.783332170  | 3.380990303 | 14.542108289 |

**24{BP86}optB51**

|    |              |              |               |
|----|--------------|--------------|---------------|
| 26 | 5.530647676  | 10.223990390 | 17.861361071  |
| 17 | 7.193514054  | 8.743390673  | 18.679056898  |
| 7  | 5.753077887  | 11.452525880 | 19.350288447  |
| 3  | 8.79496937   | 9.560763990  | 18.682510640  |
| 7  | 5.214874075  | 9.036000265  | 16.337958291  |
| 7  | 6.587361567  | 11.410839645 | 16.729527488  |
| 6  | 6.882461824  | 12.280283704 | 19.504448515  |
| 7  | 6.259629269  | 12.332940459 | 20.914123023  |
| 6  | 6.280411628  | 11.622570060 | 16.25224054   |
| 5  | 5.297613034  | 11.162295994 | 20.650930543  |
| 3  | 3.98855926   | 10.677604709 | 20.71125868   |
| 3  | 3.245614480  | 10.084323404 | 19.825886682  |
| 6  | 1.828488154  | 9.714622504  | 19.808938430  |
| 6  | 1.654609062  | 8.824682924  | 18.744330923  |
| 6  | 2.961891931  | 8.664497792  | 18.606395761  |
| 3  | 3.820119985  | 7.65206397   | 17.206254230  |
| 4  | 4.586960380  | 7.779702310  | 16.481079582  |
| 5  | 5.288109893  | 6.788758611  | 15.671040668  |
| 6  | 6.262887090  | 7.47883715   | 14.935862449  |
| 6  | 6.159266952  | 8.889757845  | 15.306125356  |
| 6  | 6.763572105  | 10.015916160 | 14.699266788  |
| 6  | 6.780283459  | 11.278317577 | 15.339627543  |
| 7  | 6.168125897  | 12.576316110 | 14.780249522  |
| 6  | 7.347313211  | 13.450428584 | 15.857340481  |
| 7  | 6.069057769  | 12.690430193 | 17.078838394  |
| 7  | 7.384451622  | 13.038060580 | 18.415528878  |
| 8  | 8.520573948  | 12.902339961 | 21.525206845  |
| 1  | 8.784766197  | 13.861661267 | 21.056856808  |
| 1  | 8.333726228  | 13.123897352 | 22.593791769  |
| 6  | 6.353747041  | 11.273334356 | 23.995373046  |
| 7  | 7.079172492  | 11.946883690 | 23.588994719  |
| 1  | 5.386059260  | 11.444282482 | 23.594761326  |
| 6  | 6.791945627  | 9.803807609  | 23.341962453  |
| 1  | 6.856994717  | 9.598076434  | 24.46234776   |
| 1  | 6.071002096  | 9.095269154  | 22.899874668  |
| 1  | 7.777964138  | 9.599221578  | 22.890711133  |
| 6  | 6.718862184  | 10.303506039 | 20.652074236  |
| 1  | -0.186016973 | 9.67416515   | 20.545598876  |
| 1  | 0.980326613  | 10.285921576 | 21.727696625  |
| 6  | 0.366305282  | 11.759683092 | 20.240400061  |
| 1  | -0.467568714 | 12.143119650 | 20.862986625  |
| 1  | 1.233677516  | 12.427781216 | 20.389475772  |
| 1  | 0.066541346  | 11.814684196 | 19.185127400  |
| 6  | 0.328618331  | 8.284334034  | 18.256548199  |
| 1  | 0.397584340  | 7.206013528  | 18.040136634  |
| 1  | -0.421590257 | 8.387797915  | 19.063138050  |
| 6  | -0.193010377 | 9.017231348  | 16.991260346  |
| 1  | -1.170589031 | 8.606601421  | 16.678246766  |
| 1  | -0.316902614 | 10.098625296 | 17.181535202  |
| 1  | 0.514005151  | 8.901821373  | 16.150285681  |
| 5  | 5.135640235  | 5.283794243  | 15.708507263  |
| 1  | 4.074253285  | 4.990178027  | 15.61727652   |
| 1  | 5.605942942  | 4.852405389  | 14.804601953  |
| 1  | 5.790293251  | 4.642762560  | 16.962189939  |
| 1  | 5.685528959  | 3.542982485  | 16.932541244  |
| 1  | 6.864072664  | 4.888579553  | 17.022275777  |
| 1  | 5.314243721  | 5.009560626  | 17.887595833  |
| 6  | 7.311639305  | 6.822195073  | 14.065828952  |
| 1  | 6.935751074  | 5.836776066  | 13.730507051  |
| 1  | 7.491688944  | 7.408382580  | 13.51847026   |
| 8  | 6.862658935  | 6.615920038  | 14.804382173  |
| 1  | 9.393906774  | 6.123301919  | 14.1371728565 |
| 1  | 9.087632005  | 7.581044781  | 15.129494921  |
| 1  | 8.534048283  | 5.987925858  | 15.703186132  |
| 7  | 7.211187726  | 12.971728230 | 13.220292707  |
| 1  | 7.768206426  | 13.922307309 | 13.2021788766 |
| 1  | 7.765025256  | 12.228949504 | 12.704230237  |
| 5  | 5.798553016  | 13.156988383 | 12.742733658  |
| 1  | 5.874324287  | 13.469078252 | 11.646938904  |
| 1  | 5.225596577  | 12.213844958 | 12.744634807  |
| 1  | 5.224232330  | 13.925770537 | 13.252415922  |
| 7  | 6.718996065  | 14.934066300 | 15.739427351  |
| 1  | 8.388437698  | 15.254398883 | 16.459511915  |
| 1  | 8.031494366  | 15.145704560 | 14.735025267  |
| 6  | 6.345509198  | 15.796391723 | 15.946207012  |
| 1  | 6.581120540  | 16.869890128 | 15.829313474  |
| 1  | 5.562631444  | 15.531400675 | 15.213020609  |
| 1  | 5.928967295  | 15.645193218 | 16.957502580  |
| 3  | 3.378393323  | 10.798398483 | 12.235384449  |
| 6  | 3.08923903   | 12.073515990 | 22.784717235  |
| 1  | 3.339833829  | 12.969356738 | 22.202966679  |
| 6  | 2.522927384  | 12.204591655 | 24.065172018  |
| 6  | 2.514598755  | 9.744805294  | 24.284674042  |
| 3  | 3.079408803  | 9.643555807  | 22.991990719  |
| 1  | 3.294286538  | 8.657249986  | 22.566548034  |
| 6  | 2.541801996  | 6.616961455  | 17.101548854  |
| 6  | 2.416176063  | 5.575649209  | 18.234946839  |
| 1  | 2.943076558  | 5.846766611  | 19.155772639  |
| 6  | 1.626705893  | 4.409382790  | 18.195147135  |
| 6  | 0.943133732  | 4.099966612  | 16.994364435  |
| 1  | 0.318025352  | 3.199553351  | 16.951099953  |
| 6  | 1.043886569  | 4.920264890  | 15.850244437  |
| 6  | 1.855213781  | 6.078805118  | 15.915323896  |
| 1  | 1.949241126  | 6.729436504  | 15.038760792  |
| 7  | 7.420282831  | 9.862847441  | 13.357133712  |
| 6  | 6.645682491  | 9.599841410  | 12.304326142  |
| 1  | 5.557621177  | 9.509688653  | 12.299434815  |
| 6  | 7.256947608  | 9.446881365  | 10.937230867  |
| 6  | 8.663891267  | 9.549428653  | 10.850989532  |

|   |              |              |              |
|---|--------------|--------------|--------------|
| 1 | 9.148448721  | 9.421702748  | 9.875157430  |
| 6 | 9.464458712  | 9.805424493  | 11.989392597 |
| 6 | 8.827616850  | 9.964596599  | 13.240013015 |
| 1 | 9.429485216  | 10.152787393 | 14.135945810 |
| 6 | 8.255991028  | 14.217874698 | 18.704147423 |
| 6 | 9.632387129  | 14.200978808 | 18.387803578 |
| 1 | 10.066890541 | 13.312611841 | 17.916135391 |
| 6 | 9.869118888  | 16.450036275 | 19.283178919 |
| 6 | 8.491719843  | 16.494195189 | 19.066553404 |
| 7 | 7.697353920  | 15.365497674 | 19.283178919 |
| 1 | 6.631472857  | 15.370394114 | 19.570742823 |
| 1 | 1.825011421  | 7.685515435  | 24.478052722 |
| 6 | 1.503378791  | 3.504240261  | 19.408330607 |
| 1 | 1.880012667  | 2.486979989  | 19.191458358 |
| 1 | 2.076229833  | 3.899138223  | 20.264338515 |
| 1 | 0.449319600  | 3.398151520  | 19.727385589 |
| 6 | 0.303815679  | 4.570169664  | 14.570991188 |
| 1 | -0.373011391 | 3.711732311  | 14.719890259 |
| 1 | -0.302419945 | 5.421007029  | 14.209825591 |
| 1 | 1.007112815  | 4.305615171  | 13.758633529 |
| 1 | 6.417062424  | 9.166239423  | 9.702209779  |
| 1 | 7.043185374  | 9.106903913  | 8.795308927  |
| 1 | 5.868912113  | 8.209716607  | 9.795554720  |
| 1 | 5.661240331  | 9.957487131  | 9.539673590  |
| 6 | 10.974003136 | 9.932001217  | 11.871175959 |
| 1 | 11.287994600 | 10.981834956 | 11.788486426 |
| 1 | 11.480036446 | 9.507866281  | 12.759764001 |
| 1 | 11.351651614 | 9.395011524  | 10.977945201 |
| 6 | 7.891089599  | 17.726774454 | 20.260782160 |
| 1 | 8.096411814  | 18.638639953 | 19.669286311 |
| 1 | 6.796986214  | 17.632858662 | 16.37480273  |
| 1 | 8.313403236  | 17.893227668 | 21.270112297 |
| 7 | 10.315542986 | 9.244436592  | 18.537460315 |
| 1 | 9.286959940  | 9.215956848  | 18.469035947 |
| 6 | 11.287576424 | 11.661455439 | 15.879595417 |
| 1 | 10.794685524 | 12.310966870 | 15.146273724 |
| 6 | 10.491017290 | 10.866446250 | 16.732027323 |
| 1 | 9.398042075  | 10.900011035 | 16.650436256 |
| 7 | 7.276705239  | 6.024078909  | 20.694165127 |
| 1 | 7.266269645  | 6.854245280  | 20.096663634 |
| 1 | 6.387029473  | 5.583492285  | 20.909066260 |
| 8 | 8.443451072  | 4.279678958  | 21.949782948 |
| 1 | 7.482623556  | 3.815895935  | 22.206259202 |
| 6 | 8.456175833  | 5.457420597  | 21.148744704 |
| 6 | 9.732686566  | 11.938630517 | 21.419007227 |
| 1 | 10.631433101 | 12.401805221 | 21.865678961 |
| 1 | 9.533759232  | 10.990192386 | 21.948773745 |
| 1 | 9.955218651  | 11.692565274 | 20.366634872 |
| 1 | 10.455251652 | 15.313096376 | 18.683487135 |
| 1 | 10.498686970 | 17.320533802 | 19.506468285 |
| 1 | 11.944151502 | 15.263488881 | 18.390363388 |
| 1 | 12.159665257 | 14.641599998 | 17.503730581 |
| 1 | 12.356290662 | 16.273898889 | 18.219422132 |
| 1 | 12.500589146 | 14.817554132 | 19.238644479 |
| 1 | 10.745692663 | 8.654557604  | 19.244518771 |
| 6 | 11.095017271 | 10.013576968 | 17.695683303 |
| 6 | 12.519593334 | 9.992397698  | 17.778367231 |
| 6 | 13.299058016 | 10.792763724 | 16.923972425 |
| 1 | 14.391578560 | 10.755446083 | 17.017464300 |
| 6 | 12.697102327 | 11.637560546 | 15.970983757 |
| 1 | 13.311437086 | 12.256158926 | 15.308877179 |
| 6 | 9.642520001  | 7.314872524  | 22.412421630 |
| 6 | 10.889088579 | 4.295420295  | 22.093395337 |
| 1 | 11.821234466 | 3.805620332  | 22.454967607 |
| 6 | 10.90930622  | 5.460707715  | 21.982929636 |
| 1 | 11.867479544 | 5.926058519  | 21.037356813 |
| 6 | 9.718374749  | 6.039020907  | 20.832083585 |
| 6 | 2.239601422  | 11.029398456 | 24.801899351 |
| 1 | 1.796332768  | 11.118452812 | 25.801719820 |
| 6 | 2.206226143  | 13.572496513 | 24.643990811 |
| 1 | 1.113973862  | 13.739503780 | 24.708604805 |
| 1 | 2.611453978  | 13.680659933 | 25.667042675 |
| 1 | 2.631507849  | 14.379851507 | 24.024138676 |
| 6 | 2.237970593  | 8.496654159  | 25.104120637 |
| 1 | 1.520704914  | 8.698737152  | 25.918033388 |
| 1 | 3.165667043  | 8.109359497  | 25.567741980 |
| 1 | 9.601482047  | 2.809511340  | 23.029048274 |
| 1 | 9.746612574  | 6.947579542  | 20.219873031 |
| 1 | 13.003636807 | 9.341768747  | 18.512762758 |

**24{BP86}optB52**

|    |             |              |              |
|----|-------------|--------------|--------------|
| 26 | 5.763347793 | 10.315010378 | 17.758424178 |
| 17 | 7.310912730 | 8.772064987  | 18.559179946 |
| 7  | 6.015135505 | 11.594318783 | 19.221125512 |
| 7  | 4.246192268 | 9.164494385  | 18.731983514 |
| 7  | 5.411612069 | 9.102457715  | 16.238698372 |
| 7  | 6.652639539 | 11.563162700 | 16.536689976 |
| 6  | 6.998035168 | 12.586174419 | 19.261369474 |
| 7  | 7.485984446 | 12.759235313 | 20.623155986 |
| 6  | 6.749400321 | 11.886570513 | 21.422509826 |
| 6  | 5.771713183 | 11.245663101 | 20.552810467 |
| 6  | 4.609363307 | 10.553300494 | 20.934215147 |
| 1  | 3.781503735 | 9.882330688  | 19.992055774 |
| 6  | 2.453427854 | 9.307816234  | 20.213665360 |
| 6  | 2.176961161 | 8.499826227  | 19.112620110 |
| 6  | 3.350363045 | 8.563710864  | 18.243726450 |
| 6  | 4.831756341 | 7.842507550  | 16.390572674 |
| 6  | 5.495538106 | 6.876364657  | 15.524031802 |
| 6  | 6.441192651 | 7.588408176  | 14.787257063 |
| 6  | 6.          |              |              |

|    |              |              |               |
|----|--------------|--------------|---------------|
| 1  | 8.048501968  | 18.384272603 | 20.503433344  |
| 7  | 10.091280941 | 9.405283635  | 19.942947473  |
| 9  | 9.117357347  | 9.265400012  | 19.628434616  |
| 6  | 11.316754380 | 11.078688701 | 16.854032989  |
| 10 | 10.897333105 | 11.618758241 | 15.993569734  |
| 1  | 10.443109036 | 10.566172198 | 17.821297799  |
| 9  | 9.358296338  | 10.691770300 | 17.714665830  |
| 7  | 5.288621967  | 7.105005335  | 20.705980796  |
| 1  | 5.903686848  | 7.547017255  | 20.009265040  |
| 1  | 4.298096545  | 7.278691374  | 20.521098604  |
| 4  | 6.478194508  | 5.015934234  | 21.818348500  |
| 1  | 3.656119795  | 5.391105878  | 21.963956890  |
| 6  | 5.624282789  | 5.826003945  | 21.137026662  |
| 6  | 10.011177385 | 12.983941351 | 20.003966550  |
| 10 | 10.77969077  | 13.646853751 | 21.438659957  |
| 1  | 10.060722151 | 12.066049090 | 21.508909162  |
| 10 | 10.268148923 | 12.812309067 | 19.941348147  |
| 6  | 10.277406948 | 15.749430574 | 17.994264804  |
| 10 | 10.276455662 | 17.832022726 | 18.597641711  |
| 1  | 11.745008125 | 15.739214754 | 17.613997597  |
| 1  | 12.027753505 | 14.790941941 | 17.124622115  |
| 1  | 11.990591433 | 16.570266119 | 16.925640570  |
| 1  | 12.390137130 | 15.857223791 | 18.507532445  |
| 1  | 10.446939802 | 8.611124665  | 20.479261764  |
| 6  | 10.951722161 | 9.859954836  | 18.942088086  |
| 6  | 12.354159464 | 9.683186992  | 19.046549080  |
| 6  | 13.215789818 | 10.202788187 | 18.073486285  |
| 1  | 14.298687974 | 10.052053089 | 18.180961416  |
| 1  | 12.709952725 | 10.907682490 | 16.968408923  |
| 1  | 13.388532933 | 11.311553135 | 16.208037020  |
| 6  | 5.044840578  | 3.757389288  | 22.315892937  |
| 6  | 6.352169986  | 3.269726339  | 22.148080764  |
| 1  | 6.634772042  | 2.284989538  | 22.5372119922 |
| 7  | 7.290969753  | 4.067615727  | 21.470880113  |
| 1  | 8.315387828  | 3.702569715  | 21.32452092   |
| 6  | 6.940341910  | 5.326636167  | 20.969725375  |
| 6  | 3.568364232  | 10.433581198 | 25.112603779  |
| 1  | 3.313036326  | 10.402921520 | 26.182412830  |
| 6  | 2.813875825  | 12.861113583 | 25.805561215  |
| 1  | 1.714606485  | 12.784646867 | 25.196586596  |
| 1  | 3.232806792  | 12.986041231 | 26.101347653  |
| 1  | 3.024527020  | 13.782142806 | 26.512357929  |
| 6  | 4.300127070  | 8.001147581  | 25.294019953  |
| 1  | 3.447880763  | 7.783780885  | 25.965435197  |
| 1  | 5.199378184  | 8.087458648  | 25.932391416  |
| 1  | 4.296446474  | 3.151972363  | 22.843729353  |
| 1  | 7.679173549  | 5.942412454  | 20.441344511  |
| 1  | 12.763871220 | 9.137474020  | 19.907817201  |

#### 44{BP86}optBS1

|    |              |              |              |
|----|--------------|--------------|--------------|
| 26 | 5.444260446  | 10.248235186 | 17.199821650 |
| 7  | 7.175312389  | 8.744566786  | 18.84691295  |
| 7  | 5.632048250  | 11.507386670 | 19.397160296 |
| 7  | 3.787194676  | 9.567944157  | 18.726238121 |
| 5  | 5.181454663  | 9.053402714  | 16.400438737 |
| 7  | 6.497958578  | 11.445699388 | 16.782223221 |
| 6  | 6.777923266  | 12.311208737 | 19.560595688 |
| 6  | 7.130298275  | 12.364766474 | 20.978582332 |
| 6  | 6.111069520  | 11.702314403 | 20.678200498 |
| 6  | 5.139123708  | 11.244858939 | 20.688222442 |
| 6  | 3.827547054  | 10.754156612 | 20.885200007 |
| 6  | 3.118929856  | 10.119115171 | 19.836368504 |
| 6  | 1.713788475  | 9.717150967  | 19.799756494 |
| 6  | 1.579000429  | 8.795892089  | 18.515228197 |
| 2  | 2.898046371  | 8.649419626  | 18.138967744 |
| 6  | 3.350874072  | 7.649395201  | 17.242567673 |
| 6  | 4.571993411  | 7.795252390  | 16.546097511 |
| 6  | 5.301155475  | 6.808869898  | 15.748907148 |
| 6  | 6.259260296  | 7.513395722  | 15.005603052 |
| 6  | 6.126677110  | 8.923812017  | 15.165217719 |
| 6  | 6.693882971  | 10.061875311 | 14.749363967 |
| 6  | 6.670322729  | 11.326972802 | 15.388927399 |
| 6  | 7.036303152  | 12.629621424 | 14.938731196 |
| 6  | 7.230130583  | 13.494770960 | 15.525288281 |
| 6  | 6.973411864  | 12.722243914 | 17.138310366 |
| 6  | 7.312967501  | 13.043180874 | 18.477593927 |
| 6  | 8.410493292  | 12.881700661 | 21.196016984 |
| 6  | 8.712446175  | 13.834094879 | 21.53024323  |
| 6  | 8.233550809  | 13.100492195 | 22.66549365  |
| 6  | 6.136511951  | 11.392549384 | 23.158873498 |
| 6  | 6.871003701  | 12.056900904 | 23.651134772 |
| 1  | 5.162772211  | 11.607628509 | 23.628759355 |
| 6  | 6.522837690  | 9.918819807  | 23.460185057 |
| 1  | 6.583852831  | 9.752218480  | 24.551542867 |
| 1  | 5.768237863  | 9.22658237   | 23.047033612 |
| 1  | 7.498865326  | 9.667073295  | 23.010801009 |
| 6  | 6.573404989  | 10.290848137 | 20.611555055 |
| 1  | -0.309638134 | 9.632617624  | 20.509245710 |
| 1  | 0.819701417  | 10.309356481 | 21.685534714 |
| 6  | 0.181292472  | 11.724713917 | 20.163373335 |
| 1  | -0.673942858 | 12.096636095 | 20.756971374 |
| 1  | 1.025114971  | 12.423567489 | 20.301007138 |
| 1  | -0.103518534 | 11.743910747 | 19.096107861 |
| 6  | 0.272183757  | 8.205238695  | 18.269994917 |
| 1  | 0.381257011  | 7.130496547  | 18.052948333 |
| 1  | -0.478323512 | 8.280920764  | 19.072999322 |
| 6  | -0.281608488 | 8.918110126  | 17.007122752 |
| 1  | -1.246386802 | 8.473216869  | 16.701798694 |
| 1  | -0.440958281 | 9.995017830  | 17.195915613 |
| 1  | 0.423474140  | 8.823408633  | 16.162425248 |
| 6  | 5.193853393  | 5.301642247  | 15.519891213 |
| 1  | 4.144019405  | 4.972590484  | 15.752835660 |
| 1  | 5.711747937  | 4.863885678  | 14.945802897 |
| 6  | 5.821096204  | 4.715896037  | 17.114411838 |
| 1  | 5.760636158  | 3.612103354  | 17.106200192 |

|   |              |              |               |
|---|--------------|--------------|---------------|
| 1 | 6.881623367  | 5.005928589  | 17.210663101  |
| 5 | 5.293375399  | 5.084205813  | 18.010811018  |
| 6 | 7.319423289  | 6.875631418  | 14.134784180  |
| 1 | 6.958670761  | 5.886406294  | 13.793879794  |
| 1 | 7.492821191  | 7.469437159  | 13.224020306  |
| 6 | 8.671111187  | 6.687180016  | 14.876771104  |
| 1 | 9.412031096  | 6.208759922  | 14.210292248  |
| 1 | 9.080975470  | 7.656334075  | 15.208655207  |
| 1 | 8.548411135  | 6.052604449  | 15.771846095  |
| 6 | 7.062383671  | 13.075454579 | 13.382661711  |
| 1 | 7.595955780  | 14.001652271 | 13.287848753  |
| 1 | 7.631088733  | 12.311353644 | 12.780590200  |
| 6 | 5.642526995  | 13.191604812 | 12.775126650  |
| 1 | 5.705772426  | 13.514630153 | 11.719904543  |
| 1 | 5.094817024  | 12.233742707 | 12.809104282  |
| 1 | 5.050695948  | 13.940366643 | 13.331806629  |
| 6 | 7.500833672  | 14.978680051 | 15.821017438  |
| 1 | 8.270731143  | 15.288650255 | 16.544638706  |
| 1 | 7.9133114482 | 15.209900486 | 14.818894727  |
| 6 | 6.228250650  | 15.839815348 | 16.039556989  |
| 1 | 6.464877742  | 16.914000447 | 15.934539396  |
| 1 | 5.443588501  | 15.584434498 | 15.304789300  |
| 1 | 5.812548406  | 15.676520577 | 17.049476417  |
| 6 | 3.186739267  | 10.882785782 | 22.235444603  |
| 6 | 2.852739441  | 12.156073243 | 22.755364680  |
| 1 | 3.068981934  | 13.048679132 | 22.158116687  |
| 6 | 2.247572795  | 12.288742799 | 24.024100277  |
| 6 | 2.327315044  | 9.834600158  | 24.290734651  |
| 6 | 2.913502746  | 9.730671231  | 23.008822604  |
| 1 | 3.166163126  | 8.745016368  | 22.602825017  |
| 6 | 2.530660819  | 6.408432004  | 17.050853428  |
| 6 | 2.366595946  | 5.494803925  | 18.119482423  |
| 1 | 2.837433157  | 5.713862422  | 19.083937403  |
| 6 | 1.613319047  | 4.311594186  | 17.956884715  |
| 6 | 1.006206252  | 4.065190674  | 16.703226224  |
| 1 | 0.408453505  | 3.155116203  | 16.568840987  |
| 1 | 1.148323675  | 4.960991812  | 15.619092644  |
| 6 | 1.917927129  | 6.131296598  | 15.806932639  |
| 1 | 2.044977092  | 6.839108569  | 14.980292624  |
| 6 | 7.384114759  | 9.927344981  | 13.2423084527 |
| 6 | 6.653319171  | 9.649828673  | 12.464391100  |
| 1 | 5.565615487  | 9.530343419  | 12.305873705  |
| 6 | 7.308136965  | 9.525705281  | 10.998285846  |
| 6 | 8.171444745  | 9.679200878  | 10.952357211  |
| 1 | 9.227172311  | 9.585430037  | 9.988307722   |
| 6 | 9.469732626  | 9.947224407  | 12.117645247  |
| 6 | 8.790742936  | 10.075270216 | 13.347333397  |
| 1 | 9.360708351  | 10.277143737 | 14.260142639  |
| 6 | 8.281410470  | 14.161989921 | 18.731481781  |
| 6 | 9.639296228  | 14.013590773 | 18.361289249  |
| 1 | 9.974421874  | 13.076387059 | 17.904309318  |
| 6 | 10.112337587 | 16.251557355 | 19.183130912  |
| 6 | 8.760903152  | 16.426882478 | 19.560641968  |
| 6 | 7.853483846  | 15.368337430 | 19.332116100  |
| 6 | 6.802609089  | 15.480119695 | 19.622425930  |
| 1 | 1.838309935  | 7.72086189   | 20.58098164   |
| 6 | 1.477739594  | 3.312855041  | 19.093142720  |
| 1 | 2.241729200  | 2.514678201  | 19.015935794  |
| 1 | 1.610525804  | 3.798380209  | 20.075412000  |
| 1 | 0.488583983  | 2.820850320  | 19.084215517  |
| 6 | 0.512512704  | 4.660227144  | 14.272771740  |
| 1 | -0.364862212 | 3.998750633  | 14.379225227  |
| 1 | 0.185302212  | 5.584307371  | 13.764557860  |
| 1 | 1.228113706  | 4.151906595  | 13.975736343  |
| 6 | 6.517538018  | 9.206610679  | 9.741150689   |
| 1 | 7.084792983  | 9.468563351  | 8.831304065   |
| 1 | 6.277542027  | 8.127053548  | 9.682093405   |
| 1 | 5.558548516  | 9.754483091  | 9.715812161   |
| 6 | 10.980428812 | 10.043409037 | 12.047939356  |
| 1 | 11.284797138 | 10.822106133 | 11.283129689  |
| 1 | 11.399848124 | 10.398480347 | 13.017602480  |
| 1 | 11.455483543 | 9.121831127  | 11.776618033  |
| 6 | 8.304776591  | 17.719092885 | 20.215766106  |
| 1 | 8.706624386  | 18.603145970 | 19.688195461  |
| 1 | 7.204483235  | 17.799874609 | 20.225238771  |
| 1 | 8.652701898  | 17.781356293 | 21.265050292  |
| 7 | 10.339926289 | 8.768077402  | 18.556727974  |
| 1 | 9.313998797  | 8.866003418  | 18.597004452  |
| 1 | 11.294302071 | 11.359682644 | 16.065980474  |
| 1 | 10.803035811 | 12.121780139 | 15.449056879  |
| 6 | 10.503989896 | 10.549051828 | 16.900360891  |
| 1 | 9.143538028  | 10.672596308 | 16.930385148  |
| 7 | 7.969732988  | 6.888571076  | 21.544457353  |
| 1 | 7.584785988  | 7.395815321  | 20.743540163  |
| 1 | 7.646550682  | 7.150688379  | 22.469188137  |
| 6 | 9.650851198  | 5.413113902  | 22.531638381  |
| 1 | 9.272071991  | 5.644739589  | 23.534232906  |
| 6 | 9.036806704  | 6.018884279  | 21.398619109  |
| 6 | 9.585019704  | 11.871870343 | 21.477885576  |
| 1 | 10.497661069 | 12.289075306 | 21.941704650  |
| 1 | 9.344890142  | 10.918769246 | 21.981059094  |
| 1 | 9.808889269  | 11.642343989 | 20.422303069  |
| 1 | 10.570141717 | 15.051812763 | 18.590475819  |
| 1 | 10.825270007 | 17.067850684 | 19.356250822  |
| 6 | 12.032720031 | 14.878643912 | 18.22067261   |
| 1 | 12.196475007 | 13.947229807 | 17.652890726  |
| 1 | 12.396791126 | 15.724987957 | 17.608273930  |
| 1 | 12.670149057 | 14.834571222 | 19.123995566  |
| 1 | 10.764402502 | 8.050929588  | 19.138647197  |
| 6 | 11.108702263 | 9.553636238  | 17.726892128  |
| 6 | 12.527318665 | 9.406664519  | 17.668274719  |
| 6 | 13.299312031 | 10.221862758 | 16.827892879  |
| 1 | 14.3         |              |               |



6 2.883157000 5.388992000 17.936976000  
1 3.559842000 5.514884000 18.791778000  
6 2.121370000 4.216038000 17.796806000  
6 1.274213000 4.097037000 16.675030000  
1 0.662279000 3.191123000 16.561742000  
6 1.193397000 5.102840000 15.693873000  
6 1.978906000 6.263304000 15.852503000  
1 1.934593000 7.060178000 15.098996000  
6 7.726215000 9.900577000 13.379675000  
6 7.042644000 6.04740000 12.185193000  
1 5.952312000 9.480337000 12.207214000  
6 7.740686000 9.467260000 10.967406000  
6 9.139074000 9.623137000 10.972267000  
1 1.690639000 9.517922000 10.027428000  
6 9.852703000 9.908327000 12.155340000  
6 9.129786000 10.052112000 13.351703000  
1 9.661144000 10.284374000 14.282074000  
6 8.090974000 14.539250000 18.483345000  
6 9.456597000 14.602463000 18.090317000  
1 9.951472000 13.709789000 17.986116000  
6 9.527257000 16.925944000 18.769885000  
6 8.163959000 16.893039000 19.123746000  
6 7.457144000 15.686912000 18.956505000  
1 6.395955000 15.634865000 19.231473000  
1 4.207907000 6.911437000 24.626508000  
6 2.22075000 3.996804000 18.815066000  
1 2.846799000 2.266162000 18.433376000  
1 2.683482000 3.445737000 19.754827000  
1 1.229866000 2.671853000 19.052458000  
6 0.300537000 4.935982000 14.480155000  
1 -0.475631000 4.170138000 14.652197000  
1 -0.205407000 5.881534000 14.214461000  
1 0.883910000 4.620900000 13.593370000  
6 6.997763000 9.136217000 9.687929000  
1 7.634295000 9.292830000 8.799683000  
1 6.667469000 8.079269000 9.677603000  
1 6.091144000 9.758379000 9.571877000  
1 11.361883000 10.052776000 12.137613000  
1 11.688200000 10.786487000 11.376603000  
1 11.746352000 10.381632000 13.118379000  
1 11.852899000 9.092316000 11.889798000  
6 7.484107000 18.123597000 19.691222000  
1 7.731228000 19.029120000 19.107475000  
1 6.386104000 18.012652000 19.697651000  
1 7.805069000 18.314221000 20.733456000  
7 10.652563000 9.497380000 18.986728000  
1 9.634146000 9.317398000 18.924013000  
1 11.003658000 11.780797000 16.073272000  
1 10.356520000 12.416771000 15.455333000  
1 10.419544000 11.020217000 17.096148000  
1 9.336821000 11.054597000 17.265368000  
7 5.283003000 6.746812000 10.104483000  
1 6.052654000 7.315742000 19.720756000  
4 4.434037000 7.292425000 20.239066000  
6 4.568850000 5.317595000 21.953050000  
1 3.530289000 5.641039000 21.800254000  
6 5.591508000 5.862583000 21.134555000  
6 9.966066000 12.747609000 21.093587000  
1 10.773625000 13.378615000 21.505266000  
1 9.996008000 11.770064000 21.604371000  
1 10.185270000 12.565963000 20.027963000  
1 10.190978000 15.791710000 18.261617000  
1 10.089047000 17.862371000 18.895758000  
1 11.667653000 15.844589000 17.922067000  
1 11.973208000 14.972843000 17.318959000  
1 11.922677000 16.762177000 17.360477000  
1 12.287061000 15.844875000 18.389784000  
1 11.179442000 8.685682000 17.311362000  
6 11.218528000 10.187655000 19.923894000  
6 12.613106000 10.138186000 17.666259000  
6 13.182028000 10.89051000 16.638254000  
1 14.264700000 10.838505000 16.468781000  
6 12.389752000 11.734026000 15.829064000  
1 12.841193000 12.334435000 15.031345000  
6 4.874307000 4.368787000 22.939003000  
6 6.197645000 3.942747000 23.142417000  
1 6.433201000 3.202990000 23.915652000  
6 7.214639000 4.485283000 22.437280000  
1 8.255611000 4.170584000 22.484771000  
6 6.924156000 5.430969000 21.347228000  
6 3.425159000 10.21690000 25.136037000  
1 3.154946000 10.163612000 26.200066000  
6 2.659955000 12.639025000 25.145333000  
1 1.555449000 12.557467000 25.232722000  
1 3.05401000 12.744802000 26.170741000  
1 2.874932000 13.571325000 24.597243000  
6 4.187373000 7.795231000 25.088195000  
1 3.407841000 7.641258000 26.056354000  
1 5.161834000 7.828122000 25.814776000  
1 4.064545000 3.957009000 23.554235000  
1 7.724134000 5.848978000 20.724065000  
1 13.250809000 9.499807000 18.292476000

64{BP86}optB1

26 5.466089822 10.285221644 18.010071112  
17 7.257549321 8.899321238 19.086267636  
7 5.605980166 11.643708428 19.421284819  
3 8.08652915 9.625662862 18.830123462  
7 5.214644480 9.005899614 16.550303184  
6 6.597437839 11.382320009 16.837717178  
6 6.654451162 12.591920814 19.509651461  
6 7.059325169 12.72466695 19.31202489  
6 6.209787817 11.908851785 21.669775380  
6 5.230359061 11.334599208 20.747379474  
6 3.988287139 10.733178091 21.030554681

6 3.197471403 10.164501195 19.976499803  
6 1.780359885 9.915228737 19.935082986  
6 1.531889986 9.136384768 18.768689777  
6 2.810316773 8.885874775 18.158838253  
6 3.181228966 7.829002450 17.252000532  
6 4.444510092 7.820896816 16.647503248  
6 5.158924815 6.729714499 15.981492272  
6 6.292833622 7.286205674 15.376840987  
6 6.256574057 8.726513855 15.641278329  
6 6.946542179 9.768126008 14.989797712  
6 6.883456177 11.112852999 15.480305514  
6 7.191272729 12.348061423 14.802190802  
6 7.168130330 13.378048509 15.782987254  
6 6.888053012 12.747425191 17.045962024  
6 7.138305981 13.255985840 18.378340013  
6 8.252664798 13.464562668 21.477561261  
1 8.420040372 14.407937303 20.938352042  
1 8.037672156 12.744464415 22.526934716  
6 6.400527004 11.571668801 23.130932395  
1 7.138078833 12.861673880 23.564584866  
1 5.476284540 11.69522365 23.705063952  
6 6.935238162 10.125834861 23.343715737  
1 7.117985712 9.937168073 24.417764559  
6 6.203518829 9.383783317 22.981425518  
1 7.877569861 9.961457973 22.792620411  
6 7.71570461 10.456071897 20.461989740  
1 -0.193784608 9.830463780 20.774005958  
1 1.036426170 10.364165314 21.931511167  
6 0.335884141 11.931173044 20.562182329  
1 -0.459801804 12.27780110 21.247648891  
1 1.211576485 12.592438260 20.687681593  
1 -0.026676444 12.045460135 19.524847094  
6 0.162870142 8.774296687 18.235619242  
1 0.097207605 7.699332513 17.995183685  
1 -0.591179618 8.957831628 19.024235383  
6 -0.228427228 9.589092716 16.974277960  
1 -1.247485528 9.323740279 16.637488488  
1 -0.203092890 10.675140322 17.179153338  
1 0.472080910 9.387046190 16.144981185  
6 4.850939092 5.250018714 16.055183979  
1 3.787864120 5.056781270 15.833019889  
1 5.430259707 4.724774612 15.273255922  
6 5.195693491 4.624652543 17.433612782  
1 5.015195864 3.533817416 17.416479954  
1 6.25208316 4.800540852 17.009135821  
1 4.567261973 5.063120022 18.228288231  
6 7.414237157 5.604723597 14.729683423  
7 7.046637864 5.495804491 14.462893033  
1 7.730137350 6.975828107 13.785426667  
6 8.652816372 6.357650987 16.551368511  
1 9.442175413 5.770212496 15.15252076  
1 9.069915873 7.346155680 15.913898178  
1 8.390258530 5.847258629 16.597981396  
6 7.371210976 12.579469889 13.318229600  
1 7.947073723 13.512252481 13.164554405  
1 7.969317010 11.774506009 12.683696066  
6 6.023895643 12.695539612 12.555623236  
1 6.198687587 12.889302951 11.481106142  
1 5.442685365 11.760995988 12.647520310  
1 5.407052506 13.518001418 12.959976416  
6 7.291971238 14.858253011 15.494783053  
1 8.029208530 15.334398614 16.163433211  
1 7.677153991 14.994628639 14.466800736  
6 9.942290848 15.613421443 15.623507425  
1 6.067277031 16.682588320 15.370164781  
1 5.179714769 15.183561395 14.948887143  
1 5.554739394 15.547774122 16.655607509  
6 3.455413717 10.640352738 22.425115070  
6 3.124651939 11.791790545 23.180901490  
6 3.274686297 12.781874119 22.737265385  
6 2.594153075 11.680818019 24.484748464  
6 2.745652645 9.222927315 24.312863514  
6 3.249725091 9.363000023 23.001335006  
1 3.497850500 8.472268771 22.414063941  
6 2.232919190 6.692539204 20.041842254  
6 1.838264548 5.873526982 18.129652617  
1 2.232063900 6.092799060 19.127941581  
6 0.950623718 4.794297731 17.945372146  
6 0.435476639 4.555072781 16.647993934  
1 -0.267988823 3.726874707 16.496146888  
6 0.799301162 5.539343896 15.546576996  
6 1.705541265 6.425007006 15.757107134  
1 2.001559666 7.064208687 14.917838927  
6 7.173367100 9.480837970 13.735122763  
6 7.040130576 9.065163362 12.563149944  
1 5.950532650 8.951263607 12.586297900  
6 7.751444884 8.796217314 11.370820645  
6 9.156608200 8.936024541 11.376275873  
1 9.718263822 8.722022618 10.458271102  
6 9.858655528 9.340929513 12.537111075  
6 9.122842793 9.620404432 13.707570993  
1 9.648949274 9.930429459 14.615424604  
6 8.020044215 14.459022666 18.516825975  
6 9.385666649 14.391459425 18.147041332  
1 9.789799379 13.450810732 17.759950693  
6 9.686739621 16.714190556 18.795857654  
6 8.326196285 16.814017601 19.164152577  
6 7.501662367 15.674827020 19.021978753  
1 6.445407887 15.726725040 19.308669036  
1 2.379018202 7.078993873 24.181190855  
6 0.563147613 3.892941754 19.105499561  
1 1.104434483 2.927967247 19.060170856  
1 7.099368446 4.361051546 20.075393479  
1 -0.517046936 3.659614780 19.092112329  
6 0.248545000 5.079375060 14.159060337  
1 -0.656230626 4.448967995 14.204188399

64{BP86}optB2

26 5.457078061 10.310601103 17.963246387  
17 7.152582446 8.880413923 19.065652799  
7 6.508299221 11.655688100 19.394071812  
7 3.821783983 9.622422778 18.814116306  
7 5.194826381 9.052987260 16.471893039  
7 6.600591802 11.414309698 16.796223010  
6 6.659506775 12.580011962 19.482050991  
6 7.070317025 12.712729695 20.878397743  
6 6.230185665 11.893110340 21.628084809  
6 5.25622072 11.334907966 20.702226741  
6 4.017012763 10.74263293 20.998170892  
6 3.221970925 10.13892401 19.963311293  
6 1.814012614 9.856756041 19.952166625  
6 1.566606999 9.084115183 18.792420933  
6 2.839738516 8.878053516 18.637646949  
6 3.216919448 7.839241741 17.232914044  
6 4.451890215 7.867525950 16.578350039  
6 5.154635678 6.788258589 15.884498461  
6 6.270535563 7.356678941 15.27643210  
6 6.221877981 8.78691903 15.564528103  
6 6.930288191 9.831711129 14.937406194  
6 6.878361037 11.166923659 15.446378471  
6 7.199647016 12.401008670 14.781878733  
6 7.181036407 13.41205201 15.770488487  
6 6.894341723 12.758731587 17.017249069  
6 7.145318464 13.250560972 18.353154347  
6 8.251283539 13.467348733 21.445290781  
1 8.391416464 14.424869127 20.923742303  
1 8.034995309 13.723477446 22.499893561  
6 6.440105415 11.543093143 23.083545106  
1 7.165303182 12.25752328 23.517305286  
1 5.511556777 11.654399886 19.952166625  
6 6.981485362 10.106878188 23.276770233  
1 7.172110738 9.909221742 24.347891503  
1 6.258495493 9.357600551 22.91621916  
1 7.923878425 9.957471237 22.721135085  
6 0.752540348 10.361143733 20.901640566  
1 -0.134789101 9.703831643 20.803014639  
1 1.096549065 10.295535184 21.645771907  
6 0.191827600 11.81636291 20.609911239  
1 -0.472686659 12.139656678 21.307488113  
1 1.173913850 12.508905172 20.82038018

|   |              |              |              |   |              |              |              |
|---|--------------|--------------|--------------|---|--------------|--------------|--------------|
| 1 | -0.068870417 | 11.918444244 | 19.577645052 | 1 | 10.308801477 | 17.598514826 | 18.867409910 |
| 6 | 0.200283962  | 8.682892054  | 18.285057974 | 6 | 11.692525370 | 15.438794992 | 17.909307775 |
| 1 | 0.157013757  | 7.605565139  | 18.051903076 | 1 | 11.998147726 | 14.406168395 | 17.669204026 |
| 1 | -0.543100882 | 8.851394591  | 19.086194522 | 1 | 11.914715931 | 16.070289603 | 17.027570954 |
| 6 | -0.228971579 | 9.480452732  | 17.032374895 | 1 | 12.335003605 | 15.801673293 | 18.733471240 |
| 1 | -1.248161930 | 9.192907469  | 16.713434329 | 1 | 10.749258023 | 8.920540533  | 19.955725182 |
| 1 | -0.222455321 | 10.568032367 | 17.228551259 | 1 | 11.007716056 | 10.134752316 | 18.287592997 |
| 1 | 0.460121900  | 9.287717942  | 16.191264439 | 6 | 12.428764471 | 10.172157124 | 18.336445440 |
| 6 | 4.861284760  | 5.305919412  | 15.927548119 | 6 | 13.156570653 | 10.898520968 | 17.389871058 |
| 1 | 3.792900537  | 5.107816957  | 15.751471153 | 1 | 14.251721401 | 10.908770367 | 17.455020846 |
| 1 | 5.404890423  | 4.813657841  | 15.100391431 | 6 | 12.506790083 | 11.611574240 | 16.364015565 |
| 6 | 5.282312001  | 4.642785098  | 17.259128936 | 1 | 13.082901711 | 12.180401971 | 15.626071005 |
| 1 | 5.111112974  | 3.551211926  | 17.215079609 | 6 | 10.191753353 | 3.195529478  | 20.644374150 |
| 1 | 6.348847876  | 4.818249556  | 17.481573553 | 6 | 11.298658899 | 3.847942059  | 20.073010801 |
| 1 | 4.693654830  | 5.046293059  | 18.101428737 | 1 | 12.287365317 | 3.376340846  | 20.078862513 |
| 6 | 7.388699778  | 6.590215091  | 14.607981613 | 6 | 11.112818725 | 5.115757148  | 19.491450528 |
| 1 | 7.026062596  | 5.578996114  | 14.347044546 | 1 | 11.962862656 | 5.639393768  | 19.036725313 |
| 1 | 7.685322914  | 7.063708751  | 13.659045438 | 6 | 9.856197213  | 5.727206290  | 19.478836922 |
| 6 | 8.636613413  | 6.455087418  | 15.512482200 | 6 | 2.520636128  | 10.475535557 | 25.022335306 |
| 1 | 9.421705441  | 5.868697722  | 15.000443736 | 1 | 2.139587449  | 10.405103847 | 26.050719702 |
| 1 | 9.055709446  | 7.445663788  | 15.759896940 | 6 | 2.263892391  | 12.998287233 | 25.186602778 |
| 1 | 8.393276018  | 5.948319858  | 16.462617793 | 1 | 1.167724210  | 13.152072668 | 25.157481688 |
| 6 | 7.401406370  | 12.645318601 | 13.304066423 | 1 | 2.553368123  | 12.938051881 | 26.251427077 |
| 1 | 7.967555146  | 13.586273495 | 13.169192033 | 1 | 2.734119153  | 13.899177180 | 24.755882583 |
| 1 | 8.020000246  | 11.853455809 | 12.854587496 | 6 | 2.733089152  | 7.940725196  | 25.005808708 |
| 6 | 6.071452754  | 12.748937927 | 12.521680821 | 1 | 1.942430139  | 7.939555574  | 25.776965104 |
| 1 | 6.261843834  | 12.952858621 | 11.451432644 | 1 | 3.679358228  | 7.657805485  | 25.507273065 |
| 1 | 5.498718637  | 11.807281671 | 12.594485966 | 1 | 10.315141999 | 2.206379056  | 21.102298991 |
| 1 | 5.434728771  | 13.560447604 | 12.918030672 | 1 | 9.723032717  | 6.716867011  | 19.024921863 |
| 6 | 7.316985019  | 14.893859246 | 15.501387464 | 1 | 12.951279323 | 9.627717024  | 19.133900447 |
| 1 | 8.039144236  | 15.362874571 | 16.189691379 |   |              |              |              |
| 1 | 7.727061606  | 15.038234284 | 14.484678908 |   |              |              |              |
| 6 | 5.969656267  | 15.645732048 | 15.603358652 |   |              |              |              |
| 1 | 6.099869079  | 16.717289603 | 15.362916763 |   |              |              |              |
| 1 | 5.221874904  | 15.224517863 | 14.907026902 |   |              |              |              |
| 1 | 5.554545996  | 15.573004017 | 16.624371050 |   |              |              |              |
| 6 | 3.501589952  | 10.658910291 | 22.395217540 |   |              |              |              |
| 3 | 3.167494178  | 11.823899364 | 23.118804254 |   |              |              |              |
| 1 | 3.299435040  | 12.802818696 | 22.641930663 |   |              |              |              |
| 6 | 2.664246772  | 11.746834548 | 24.430102125 |   |              |              |              |
| 6 | 2.853017958  | 9.294039230  | 24.332160947 |   |              |              |              |
| 3 | 3.326487187  | 9.401406516  | 23.011011142 |   |              |              |              |
| 1 | 3.578831398  | 8.496077662  | 22.445035060 |   |              |              |              |
| 6 | 2.300384572  | 6.673149960  | 17.086873163 |   |              |              |              |
| 6 | 2.002301509  | 5.863461673  | 18.206234330 |   |              |              |              |
| 1 | 2.450693173  | 6.115211330  | 19.175420023 |   |              |              |              |
| 6 | 1.143284881  | 4.758403194  | 18.097974386 |   |              |              |              |
| 6 | 0.556332149  | 4.483786455  | 16.844093252 |   |              |              |              |
| 1 | -0.130554100 | 3.631137729  | 16.750896749 |   |              |              |              |
| 6 | 0.823047224  | 5.274871313  | 15.712452943 |   |              |              |              |
| 6 | 1.702918954  | 6.367991171  | 15.848271615 |   |              |              |              |
| 1 | 1.927124293  | 7.000781416  | 14.980721395 |   |              |              |              |
| 6 | 7.738000031  | 9.560465284  | 13.710721335 |   |              |              |              |
| 6 | 7.128506710  | 9.173750355  | 12.500770634 |   |              |              |              |
| 1 | 6.037483001  | 9.060383064  | 12.463486867 |   |              |              |              |
| 6 | 7.899643799  | 8.929751496  | 11.345612474 |   |              |              |              |
| 6 | 9.297430122  | 9.066417738  | 11.428162286 |   |              |              |              |
| 1 | 9.906654036  | 8.871029839  | 10.534551155 |   |              |              |              |
| 6 | 9.937911934  | 9.442402276  | 12.627445042 |   |              |              |              |
| 6 | 9.143001289  | 9.696745919  | 13.757192801 |   |              |              |              |
| 1 | 9.620431855  | 9.986862746  | 14.699349068 |   |              |              |              |
| 6 | 8.022157917  | 14.451494441 | 18.500003565 |   |              |              |              |
| 6 | 9.387418497  | 14.388513078 | 18.144222730 |   |              |              |              |
| 1 | 9.800357547  | 13.444829865 | 17.769265376 |   |              |              |              |
| 6 | 9.665250345  | 16.713387381 | 18.763366605 |   |              |              |              |
| 6 | 8.306215720  | 16.810230610 | 19.117517131 |   |              |              |              |
| 6 | 7.494479190  | 15.666912806 | 18.983684954 |   |              |              |              |
| 1 | 6.433131040  | 15.715796821 | 19.258797526 |   |              |              |              |
| 1 | 2.501542931  | 7.144031369  | 24.276810103 |   |              |              |              |
| 6 | 0.861258018  | 3.867113350  | 19.291342691 |   |              |              |              |
| 1 | 1.427143653  | 2.917658862  | 19.225358902 |   |              |              |              |
| 1 | 1.146857439  | 4.356764571  | 20.238405980 |   |              |              |              |
| 1 | -0.209445044 | 3.600544260  | 19.354876705 |   |              |              |              |
| 6 | 0.199573450  | 4.952586313  | 14.368637360 |   |              |              |              |
| 1 | -0.683757252 | 4.299737032  | 14.478104293 |   |              |              |              |
| 1 | -0.116066632 | 5.868837296  | 13.838062122 |   |              |              |              |
| 1 | 0.917907420  | 4.428279241  | 13.708862503 |   |              |              |              |
| 6 | 7.231156401  | 8.544019866  | 10.040755040 |   |              |              |              |
| 1 | 7.964364114  | 8.160767246  | 9.310131273  |   |              |              |              |
| 1 | 6.463627822  | 7.763602181  | 10.193924191 |   |              |              |              |
| 1 | 6.722151250  | 9.410822622  | 9.577406719  |   |              |              |              |
| 6 | 11.448294647 | 9.554123039  | 12.698290267 |   |              |              |              |
| 1 | 11.846633031 | 10.176871290 | 11.875587862 |   |              |              |              |
| 1 | 11.774843400 | 9.998560078  | 13.653899485 |   |              |              |              |
| 1 | 11.927871369 | 8.560458509  | 12.611190993 |   |              |              |              |
| 6 | 7.738055061  | 18.107170076 | 19.660230896 |   |              |              |              |
| 1 | 8.108628388  | 18.981394069 | 19.094730141 |   |              |              |              |
| 1 | 6.635271959  | 18.115410757 | 19.615255853 |   |              |              |              |
| 1 | 8.027162878  | 18.260733616 | 20.718044305 |   |              |              |              |
| 7 | 10.279158071 | 9.442029050  | 19.220333611 |   |              |              |              |
| 1 | 9.246902427  | 9.378646877  | 19.171209837 |   |              |              |              |
| 6 | 11.099325103 | 11.574185981 | 16.307546870 |   |              |              |              |
| 1 | 10.565142963 | 12.125604007 | 15.523700442 |   |              |              |              |
| 6 | 10.352506475 | 10.851715012 | 17.246200348 |   |              |              |              |
| 1 | 9.257035632  | 10.806046666 | 17.191595957 |   |              |              |              |
| 7 | 7.495215714  | 5.662982319  | 20.034673878 |   |              |              |              |
| 1 | 7.359125142  | 6.606896241  | 19.656759283 |   |              |              |              |
| 1 | 6.700448277  | 5.210612598  | 20.476455316 |   |              |              |              |
| 6 | 8.926144341  | 3.789343552  | 20.638638451 |   |              |              |              |
| 1 | 8.069264404  | 3.286844499  | 21.085545695 |   |              |              |              |
| 6 | 8.733266695  | 5.069617438  | 20.053171791 |   |              |              |              |
| 6 | 9.569906237  | 12.662173724 | 21.385229242 |   |              |              |              |
| 1 | 10.400542026 | 13.251427617 | 21.815773026 |   |              |              |              |
| 1 | 9.488033414  | 11.716977904 | 21.950492319 |   |              |              |              |
| 1 | 9.833114686  | 12.406980322 | 20.344877620 |   |              |              |              |
| 6 | 10.223770821 | 15.511576890 | 18.281408284 |   |              |              |              |
